# Supplementary material for: Theoretical explanations for socioeconomic inequalities in multimorbidity: a scoping review
Source: PubMed Central journal article supplement — BMJ Open. 2022 Feb 23;12(2):e055264. doi: 10.1136/bmjopen-2021-055264 (PMC8882654; doi:10.1136/bmjopen-2021-055264), 2022-02-23

# BMJ Open

BMJ Open is committed to open peer review. As part of this commitment we make the peer review history of every article we publish publicly available.

When an article is published we post the peer reviewers' comments and the authors' responses online. We also post the versions of the paper that were used during peer review. These are the versions that the peer review comments apply to.

The versions of the paper that follow are the versions that were submitted during the peer review process. They are not the versions of record or the final published versions. They should not be cited or distributed as the published version of this manuscript.

BMJ Open is an open access journal and the full, final, typeset and author-corrected version of record of the manuscript is available on our site with no access controls, subscription charges or pay-per-view fees (<http://bmjopen.bmj.com>).

If you have any questions on BMJ Open's open peer review process please email [info.bmjopen@bmj.com](mailto:info.bmjopen@bmj.com)

# BMJ Open

## Theoretical explanations for socioeconomic inequalities in multimorbidity – A Scoping Review

|                               |                                                                                                                                                                                                                                                                                                                                                                                                                                                                                                                                                                                                                                                                                 |
|-------------------------------|---------------------------------------------------------------------------------------------------------------------------------------------------------------------------------------------------------------------------------------------------------------------------------------------------------------------------------------------------------------------------------------------------------------------------------------------------------------------------------------------------------------------------------------------------------------------------------------------------------------------------------------------------------------------------------|
| Journal:                      | <i>BMJ Open</i>                                                                                                                                                                                                                                                                                                                                                                                                                                                                                                                                                                                                                                                                 |
| Manuscript ID                 | bmjopen-2021-055264                                                                                                                                                                                                                                                                                                                                                                                                                                                                                                                                                                                                                                                             |
| Article Type:                 | Original research                                                                                                                                                                                                                                                                                                                                                                                                                                                                                                                                                                                                                                                               |
| Date Submitted by the Author: | 09-Jul-2021                                                                                                                                                                                                                                                                                                                                                                                                                                                                                                                                                                                                                                                                     |
| Complete List of Authors:     | Fleitas Alfonzo, Ludmila; The University of Melbourne School of Population and Global Health, Centre for Health Equity<br>King, Tania ; The University of Melbourne School of Population and Global Health, Centre for Health Equity<br>You, Emily; The University of Melbourne Faculty of Medicine Dentistry and Health Sciences, Department of Psychiatry<br>Contreras-Suarez, Diana; University of Melbourne, Melbourne Institute: Applied Economic & Social Research<br>Zulkelfi, Syafiqah; The University of Melbourne School of Population and Global Health, Centre for Health Equity<br>Singh, Ankur; University of Melbourne, Centre of Epidemiology and Biostatistics |
| Keywords:                     | EPIDEMIOLOGY, PUBLIC HEALTH, SOCIAL MEDICINE                                                                                                                                                                                                                                                                                                                                                                                                                                                                                                                                                                                                                                    |
|                               |                                                                                                                                                                                                                                                                                                                                                                                                                                                                                                                                                                                                                                                                                 |

SCHOLARONE™  
Manuscripts

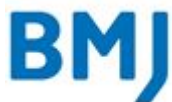

I, the Submitting Author has the right to grant and does grant on behalf of all authors of the Work (as defined in the below author licence), an exclusive licence and/or a non-exclusive licence for contributions from authors who are: i) UK Crown employees; ii) where BMJ has agreed a CC-BY licence shall apply, and/or iii) in accordance with the terms applicable for US Federal Government officers or employees acting as part of their official duties; on a worldwide, perpetual, irrevocable, royalty-free basis to BMJ Publishing Group Ltd ("BMJ") its licensees and where the relevant Journal is co-owned by BMJ to the co-owners of the Journal, to publish the Work in this journal and any other BMJ products and to exploit all rights, as set out in our [licence](#).

The Submitting Author accepts and understands that any supply made under these terms is made by BMJ to the Submitting Author unless you are acting as an employee on behalf of your employer or a postgraduate student of an affiliated institution which is paying any applicable article publishing charge ("APC") for Open Access articles. Where the Submitting Author wishes to make the Work available on an Open Access basis (and intends to pay the relevant APC), the terms of reuse of such Open Access shall be governed by a Creative Commons licence – details of these licences and which [Creative Commons](#) licence will apply to this Work are set out in our licence referred to above.

Other than as permitted in any relevant BMJ Author's Self Archiving Policies, I confirm this Work has not been accepted for publication elsewhere, is not being considered for publication elsewhere and does not duplicate material already published. I confirm all authors consent to publication of this Work and authorise the granting of this licence.

## Theoretical explanations for socioeconomic inequalities in multimorbidity – A Scoping Review

Ludmila Fleitas Alfonzo<sup>a</sup>, MPH, Tania King<sup>a</sup>, PhD, Emily You<sup>b</sup>, PhD, Diana Contreras Suárez<sup>c</sup>, PhD, Syafiqah Zulkelfi<sup>a</sup>, MSc, Ankur Singh<sup>d</sup>, PhD

- a. Centre for Health Equity, Melbourne School of Population & Global Health. The University of Melbourne. 207 Bouverie Street, Melbourne. Victoria 3004, Australia
- b. Department of Psychiatry, Medical School, University of Melbourne. 181 Grattan Street, Melbourne. Victoria 3010, Australia
- c. Melbourne Institute: Applied Economic & Social Research, University of Melbourne. 111 Barry Street, Melbourne. Victoria 3010, Australia
- d. Centre of Epidemiology and Biostatistics, Melbourne School of Population & Global Health. The University of Melbourne. 207 Bouverie Street, Melbourne. Victoria 3004, Australia

---

### Corresponding Author:

Ludmila Fleitas Alfonzo  
Disability and health unit | Centre for Health Equity  
Melbourne School Population and Global Health  
Level 4, 207, Bouverie Street  
The University of Melbourne, Victoria 3010 Australia  
E: ludmila.fleitasalfonzo@unimelb.edu.au

### Wordcount

Abstract: 235 words. Main text: 2361 words

**Figures and tables:** 1 figure and 3 tables.

### Authors contribution statement:

LFA contributed towards the development of search strategy, screening, data extraction and appraisal of included studies and manuscript preparation. AS contributed towards the design, development of search strategy, screening, data extraction and appraisal of included studies and manuscript preparation. EY contributed towards the development of search strategy, data extraction of included studies and manuscript preparation. TK and DCS contributed towards the development of search strategy and manuscript preparation. SZ contributed towards manuscript preparation.

### Funding

This project was conducted with seed funding provided by the Economic and Social Participation Research Initiative (ESPRIt) Hallmark Research Initiative by the University of Melbourne to AS, TK, EY and DCS.

### Acknowledgments

TK is also supported by an Australian Research Council Discovery Early Career Research Award (DE200100607).

### Competing interests

The authors have no competing interests to declare.

## ABSTRACT

**Objective:** To document socio-epidemiologic theories used to explain the causal relationship between socioeconomic disadvantage and multimorbidity.

**Design:** Scoping review

**Methods:** A search strategy was developed and then applied to multiple electronic databases including Medline, EMBASE, PsychInfo, Web of Science, Scielo, Applied Social Sciences, ERIC, Humanities Index and Sociological Abstracts. After the selection of studies, data was extracted using a data charting plan. Extracted data included: study design, country, population sub-groups, measures of socioeconomic inequality, assessment of multimorbidity and conclusion on the association between socioeconomic variables and multimorbidity. Included studies were furtherly assessed on their use of theory, type of theories used and context of application. Finally, we conducted a meta-narrative synthesis to summarise the results.

**Results:** A total of 36 studies were included in the review. Of these, 13 papers included theories as explanations for the association between socioeconomic inequalities and multimorbidity, and within this group, seven explicitly stated those theories. Behavioural theories were the most frequently used, followed by psychosocial and then materialist theories. Only four studies tested the explanatory potential of socio-epidemiologic theories and the remaining studies used them as post hoc explanations for their findings. Supportive evidence was found for the role of material, behavioural and life course theories.

**Conclusion:** Pathways from socioeconomic disadvantage to multimorbidity are mostly unexplored. Generating evidence of these pathways will guide the development of intervention and public policies to prevent multimorbidity among people living in social disadvantage.

**Keywords:** multimorbidity, socioeconomic inequalities, scoping review, theoretical explanations, epidemiology

### Strengths and limitations:

- First scoping review exploring the use of theories to explain the association between socioeconomic position.
- The identification of numerous gaps in the literature that future research should address to inform intervention design and public policies aiming at reducing socioeconomic inequalities in multimorbidity.
- The use of a robust methodology, including a comprehensive a search strategy, already piloted and verified in previous work.
- Non-English articles were excluded in our review. Which could have obstructed the inclusion of papers from developing countries, therefore limiting the generalisability of our findings.

## INTRODUCTION

Multimorbidity is a societal challenge and an increasingly recognised public health concern (1-3). It is described as the co-occurrence of two or more chronic conditions in an individual (4). Negative consequences of multimorbidity include: reduced quality of life; functional decline; increased healthcare utilisation; polypharmacy; higher treatment burdens; psychological distress; and increased risk of pre-mature death (5). There is an emerging threat of increased multimorbidity worldwide, primarily due to population aging and epidemiological transition from communicable to non-communicable diseases (6). Furthermore, abundant empirical evidence shows socioeconomic inequalities in multimorbidity across countries at different levels of economic development (7-11). However, pathways through which socioeconomic disadvantage leads to multimorbidity are not well studied.

Theories are used in epidemiology to understand causal relationships. This is particularly helpful to inform intervention designs. Mainly because theories provide insight into the mechanism through which an exposure (e.g. socioeconomic position) leads to a health outcome. (12). Since the release of the Black Report in 1982, several categories of theories are proposed to explain associations between social inequalities and health (13, 14):

- I. Behavioural: The behavioural explanation posits that people from different backgrounds behave differently and make health-related choices based on their social background. As people experience socioeconomic deprivation, they also encounter more barriers to adopting healthy lifestyles. For instance, individual health damaging and promoting behaviours are differentially distributed across the social scale, with more disadvantaged groups more likely to engage in health damaging behaviours such as smoking(15), and advantaged groups more likely to engage in health promoting behaviours such as physical activity (15). As a result, poor health outcomes are commonly clustered in the lower end of the social scale (13).
- II. Psychosocial: this theory postulates that the emotions that arise due to social inequality can directly affect biological health (16). This can be caused in two ways, either through the practice of health compromising behaviours or through biological changes due to the individual being in a sustained state of stress (16). Hence, the behavioural explanation can be a descendent of psychosocial processes under this explanation.

- 1  
2  
3  
4  
5  
6  
7  
8  
9  
10  
11  
12  
13  
14  
15  
16  
17  
18  
19  
20  
21  
22  
23  
24  
25  
26  
27  
28  
29  
30  
31  
32  
33  
34
- III. Materialist: the material environment has a significant impact on the health of an individual. Exposure to health-risk or health-protective factors varies according to social position based on access to material resources; this difference is more evident in non-egalitarian societies. For instance, individuals living in economic disadvantage are less likely to access information and resources necessary to maintain good health than more advantaged counterparts (13). Economically deprived individuals are also exposed to hazardous working environments (13). The materialist theory proposes these explanations as pathways from social deprivation to health inequalities (13).
  - IV. Social support: this theory holds that strong social networks and good social relationships are linked to good health. Conversely, poor social relations and weak social support networks are deleterious to health. That is because positive social support mitigates the detrimental effect of economic deprivation in health (17, 18).
  - V. Social capital: While variously defined, social capital is broadly understood to describe the functioning of social groups through a shared sense of identity, trust, cooperation, reciprocity and shared understandings, norms, and values (19). Social capital emphasises that more unequal distribution in income undermines trust and damages social relationships at a population level. This theory attempts to explain why egalitarian societies tend to be healthier than non-egalitarian societies (20, 21).

35  
36  
37  
38  
39  
40  
41  
42  
43  
44  
45  
46  
47  
48  
49  
50

In addition to the abovementioned theories, a life course framework examines the effect of early life social exposures on later health outcomes (22). Two models are proposed to explain the life course framework: the accumulation model and the critical periods model. The accumulation model emphasises the cumulative effect of exposure to disadvantage across different stages in life and increased risk of poor health outcomes. The critical periods model focuses on the effect of exposure to factors influencing health during critical periods of development on the risk of disease (23). Finally, a neo-liberal framework for health inequalities encompasses the political arrangements that lead to propagation of social inequalities and in turn health inequalities(24).

51  
52  
53  
54  
55  
56  
57  
58  
59  
60

We aim to review the applied socio-epidemiologic theories in the literature to explain the causal relationship between social disadvantage and multimorbidity in the population. Where possible, we examined whether such theories were tested using analytical methods such as mediation analysis to explain the relationship between social disadvantage and multimorbidity.

## METHODS

We conducted a scoping review to examine epidemiologic theories applied to explain the association between social disadvantage and multimorbidity (25, 26), and to map the information available in the current literature. Because the primary purpose of this study was to identify and categorise the theories being used in the existing literature, a scoping review was preferred over a systematic review. We followed the steps of a scoping review as per previously defined guidelines (25, 26).

### Stage I: Identifying the Research Question

Our review question was: “How are the socio-epidemiologic theories applied to explain the relationship between social disadvantage and multimorbidity?”

### Stage II: Identifying Relevant Studies

We identified search terms and keywords relevant to social disadvantage, theoretical pathways and multimorbidity from published systematic reviews (27, 28) and tailored them to answer our research question. First, a detailed search strategy was developed using keywords and hierarchically defined subject headings. Once the search terms were agreed upon, they were adapted for multiple electronic databases including Medline, EMBASE, PsychInfo (Ovid platform), Web of Science, Scielo, Applied Social Sciences, ERIC, Humanities Index and Sociological Abstracts (see *Appendix 1*). The reference lists of all selected articles were screened to identify any additional studies. Search alerts were set up to notify the research team of articles published after 25<sup>th</sup> of May 2018 when literature search was implemented. This search was updated on 11 December 2019.

### Stage III: Study Selection

We applied strict inclusion and exclusion criteria; these are displayed in Table 1. We excluded studies on “comorbidity” as such studies may be focussed on an index condition (e.g. diabetes) (29). The terms multimorbidity and comorbidity are often used interchangeably as both describe the presence of multiple chronic conditions. However, comorbidity is a disease-centred term that describes the presence of additional conditions associated with an index disease (4). The focus of this review is multimorbidity only. Studies on institutionalised individuals, qualitative research, and those written in a language other than English were excluded. A detailed list of inclusion and exclusion criteria can be found in *Table 1*. Abstracts and full-text articles were reviewed for inclusion by LFA using the citation manager EndNote. A second reviewer (AS) cross-checked 10% of these articles.



1  
2  
3 *See Table 1*  
4

#### 5 **Stage IV: Charting the Data**

6 A data charting form was created which included study details (study design, country,  
7 population sub-groups, measures of socioeconomic inequality, assessment of multimorbidity  
8 and conclusion on the association between socioeconomic variables and multimorbidity), use  
9 of theory (inferred or explicitly mentioned), type of theories and context of application. Data  
10 charting was performed by LFA and 10% of the studies were cross checked by AS.  
11

12 Each study was examined for the type of theory (example: psychosocial or material), extent  
13 of use (whether used in a post hoc manner or integrated within an analysis) and their context  
14 of use (background, methods or discussion section of retrieved paper(s)). We recorded  
15 whether theories that were directly mentioned or inferred were consistent with any of the  
16 existing socio-epidemiologic theories. Types of theories were recorded verbatim. This  
17 approach follows the precedent previously applied in a published study examining the  
18 application of socio-epidemiologic theories in studies on the relationship between social  
19 inequality and oral health (28).  
20  
21

#### 22 **Stage V: Collating, Summarizing and Reporting the Results**

23 We carried out a narrative synthesis to summarise the results from the retrieved data.  
24  
25

### 26 **RESULTS**

27 Our search led to the identification of 751 unique papers that underwent title and abstract  
28 screening. Sixty-nine papers were deemed eligible for full-text review. Two additional  
29 studies were included for full-text review from additional sources. After the full-text review  
30 and one additional search, thirty-six studies proceeded to data charting stage. A flowchart of  
31 this process is shown in Figure 1.  
32

33 Figure 1 Flow chart of the study selection process (*2-column fitting image*)  
34

35 (*see figure 1*)  
36

#### 37 **Summary characteristics of included studies**

38 Twelve studies were from low- and middle-income countries (11, 30-40) and the remaining  
39 24 studies were from high income countries. The majority of articles were conducted among  
40 adults and only one study included children (41). Most studies (n=24/36) were cross-sectional  
41 and only 12/36 used longitudinal data (8, 9, 35, 41-47) (Table 2).  
42  
43  
44  
45  
46  
47  
48  
49  
50  
51  
52  
53  
54  
55  
56  
57  
58  
59  
60

1  
2  
3 Educational attainment was the preferred measure of socioeconomic position (n=26/36). The  
4 majority of studies (n=18/36) simply documented the presence of multimorbidity and only a  
5 few (n=6/36) additionally examined different patterns of multimorbidity (8, 33, 40, 45, 48,  
6  
7 49) (Table 2).  
8  
9

10  
11 *See Table 2*  
12  
13

### 14 **Types of theories**

15 Overall, 16/36 of studies referred to at least one socio-epidemiological theory. Therefore, 20  
16 studies can be considered largely atheoretical without any emphasis to pathways through  
17 which social disadvantage leads to multimorbidity whatsoever. In the sixteen studies  
18 following theories were referred to: behavioural (9, 30-35, 40, 43, 50, 51), materialist (34, 35,  
19 47) and psychosocial (30, 31, 35, 42, 52). In addition, three studies applied sense of  
20 coherence, an indicator of self-efficacy and psychosocial well-being (consistent with  
21 psychosocial explanations) (46), and social capital (31), and social support (42) widely  
22 considered as psychosocial assets (Table 3). Three studies used a life-course framework.  
23 Collectively, psychosocial theory was the most referred to among studies.  
24  
25  
26  
27  
28  
29  
30  
31

### 32 **Context of application of theories**

33 Of the papers using theories, seven explicitly stated those theories (9, 32, 34, 42, 46, 47, 52),  
34 and the other six were inferred to be consistent with a presumed theoretical pathway, based  
35 on definitions from existing literature.  
36  
37  
38

39 *See Table 3*  
40  
41

### 42 **Testing the explanatory potential of theories**

43 Only four studies (9, 34, 51, 53) tested variables consistent with theoretical pathways as  
44 mediators between socioeconomic disadvantage and multimorbidity. Applying material  
45 theory, Chung, Mercer (34), examined perception of financial hardship, an indicator of  
46 economic deprivation, as a mediator between housing tenure and multimorbidity. They found  
47 a small mediation effect, indicating that increased financial burden puts private housing  
48 residents at a higher risk of suffering multiple conditions when compared with public housing  
49 residents (34).  
50  
51  
52  
53  
54  
55  
56

57 Drawing on behavioural theory as well as a life course framework, Katikireddi, Skivington  
58 (9), quantified mediation by five behavioural risk factors (diet, smoking, physical activity,  
59  
60

1  
2  
3 alcohol and BMI) acting in the association between two socioeconomic measures (area-based  
4 deprivation and household income) and multimorbidity over the life course. Their analyses  
5 showed that behavioural factors partially mediated the inverse association between area level  
6 deprivation and multimorbidity.  
7  
8  
9

10  
11 The life course framework was applied by Johnston, Black (53) in their examination of  
12 educational attainment during adulthood as a mediator of the association between father's  
13 occupational, social class at birth and multimorbidity. Their analyses showed a partial  
14 mediatory effect of educational attainment in the association between childhood  
15 socioeconomic status and multimorbidity.  
16  
17  
18  
19

20  
21 Mondor, Cohen (51) also drew on behavioural theory in their study that quantified the  
22 mediation effect of lifestyle factors (physical activity, smoking and BMI) in the association  
23 between income inequalities and multimorbidity. Lifestyle factors only explained a small  
24 proportion of observed income-related inequalities in multimorbidity.  
25  
26  
27

28  
29 Five studies (30, 32, 35, 50, 52) used theories in a post-hoc manner in their discussion to  
30 explain their findings. These were: behavioural (30, 32, 35, 50); psychosocial (30, 35, 52),  
31 and materialist (35).  
32  
33

## 34 **DISCUSSION**

### 35 **Summary of findings**

36  
37 Overall, we found limited use of theories to explain the association between socioeconomic  
38 status and multimorbidity. When used, such theories were often explicitly mentioned but not  
39 tested. Among all the potential explanations, behavioural theories were the most frequently  
40 used, followed by psychosocial and then materialist theories.  
41  
42  
43  
44

45  
46 Only four studies tested the explanatory potential of theories and their mediation effect on the  
47 association between socioeconomic position and multimorbidity. Although we identified the  
48 use of seven different theories, the only tested theories were materialist, behavioural and life  
49 course. Supportive evidence was found for the role of these theories (9, 34, 51, 53). However,  
50 their use was mostly limited to post-hoc explanations of findings in the discussion section.  
51  
52  
53  
54

### 55 **Strengths and limitations**

56  
57 Our study has some strengths and limitations. To our knowledge, this is the first scoping  
58 review exploring the use of theories to explain the association between socioeconomic  
59 position and multimorbidity in the current literature. We identified numerous gaps in the  
60

1  
2  
3 literature that need to be filled to improve our understanding of socioeconomic inequalities in  
4 multimorbidity, a growing public health problem. Our search strategy comprised a wide  
5 range of electronic databases, and we used a robust methodology, already piloted and verified  
6 in previous work (28). A key limitation is that non-English articles were excluded in our  
7 review.  
8  
9

10  
11  
12 Our findings are consistent with the two major evidence gaps highlighted in the report  
13 ‘Multimorbidity: a priority for global health research’ (4). First, consistent with our review,  
14 evidence on multimorbidity, and on the relationship between socioeconomic disadvantage  
15 and multimorbidity is largely cross-sectional. Temporal ordering between exposure (social  
16 disadvantage) and outcome (multimorbidity), a key undisputed criterion of causality (54), is  
17 however difficult to establish cross-sectionally. Second, there is a paucity of evidence on  
18 causal pathways between shared causal factor(s) (for example: social disadvantage) and  
19 multiple conditions that co-occur in multimorbidity (4). The lack of evidence precludes  
20 policy makers from intervening on causal mechanisms that can prevent, or mitigate observed  
21 socioeconomic inequalities in multimorbidity (55). In addition to these, we found a  
22 dominance of testing of behavioural theory as pathways for socioeconomic inequalities in  
23 multimorbidity. However, the use of contemporary approaches to causal inference was  
24 limited (56). Therefore, we cannot rule out bias arising from mediator-outcome confounding,  
25 time varying confounding or the presence exposure-outcome interaction. The weight of  
26 evidence needs to shift towards a more comprehensive examination of these and other  
27 pathways, and multiple pathways at once, to allow policymakers to select interventions with  
28 maximum capacity to reduce inequalities.  
29  
30  
31  
32  
33  
34  
35  
36  
37  
38  
39  
40  
41  
42

## 43 **CONCLUSION**

44  
45 Our understanding of pathways from socioeconomic inequalities to multimorbidity is limited  
46 and mostly unexplained. Studies are often focused on the patterns of distribution of multiple  
47 chronic conditions across the population, rather than the mechanisms shaping this  
48 distribution. Robust evidence from longitudinal and interventional studies is needed to  
49 understand the pathways between socioeconomic disadvantage and multimorbidity.  
50 Generating such evidence will guide the development of interventions and public policies to  
51 prevent multimorbidity among people living in disadvantage.  
52  
53  
54  
55  
56  
57  
58  
59  
60

## REFERENCES

1. Xu X, Mishra GD, Dobson AJ, Jones M. Progression of diabetes, heart disease, and stroke multimorbidity in middle-aged women: A 20-year cohort study. *PLoS medicine*. 2018;15(3):e1002516.
2. Tran J, Norton R, Conrad N, Rahimian F, Canoy D, Nazarzadeh M, et al. Patterns and temporal trends of comorbidity among adult patients with incident cardiovascular disease in the UK between 2000 and 2014: A population-based cohort study. *PLoS medicine*. 2018;15(3):e1002513.
3. Stanley J, Semper K, Millar E, Sarfati D. Epidemiology of multimorbidity in New Zealand: a cross-sectional study using national-level hospital and pharmaceutical data. *BMJ open*. 2018;8(5):e021689.
4. The Academy of Medical Sciences. *Multimorbidity: a priority for global health research*. London: The Academy of Medical Sciences; 2018.
5. Wallace E, Salisbury C, Guthrie B, Lewis C, Fahey T, Smith SM. Managing patients with multimorbidity in primary care. *Bmj*. 2015;350:h176.
6. Kingston A, Robinson L, Booth H, Knapp M, Jagger C, project ftM. Projections of multimorbidity in the older population in England to 2035: estimates from the Population Ageing and Care Simulation (PACSim) model. *Age and Ageing*. 2018;47(3):374-80.
7. Ataguba JE. Inequalities in multimorbidity in South Africa. *Intern*. 2013;12:64.
8. Jackson CA, Dobson AJ, Tooth LR, Mishra GD. Lifestyle and Socioeconomic Determinants of Multimorbidity Patterns among Mid-Aged Women: A Longitudinal Study. *PloS one*. 2016;11(6):e0156804.
9. Katikireddi SV, Skivington K, Leyland AH, Hunt K, Mercer SW. The contribution of risk factors to socioeconomic inequalities in multimorbidity across the lifecourse: a longitudinal analysis of the Twenty-07 cohort. *BMC medicine*. 2017;15(1):152.
10. Kunna R, Miguel San S, Jennifer Stewart W. Measurement and decomposition of socioeconomic inequality in single and multimorbidity in older adults in China and Ghana: results from the WHO study on global AGEing and adult health (SAGE). *Intern*. 2017;16.
11. Nunes BP, Chiavegatto Filho ADP, Pati S, Cruz Teixeira DS, Flores TR, Camargo-Figuera FA, et al. Contextual and individual inequalities of multimorbidity in Brazilian adults: a cross-sectional national-based study. *BMJ open*. 2017;7(6):e015885.
12. Arcaya MC, Arcaya AL, Subramanian SV. Inequalities in health: definitions, concepts, and theories. *Global Health Action*. 2015;8(1):27106.
13. Bartley M. *Health inequality : an introduction to theories, concepts, and methods*. Cambridge, UK: Polity Press; 2004.
14. Townsend P, Davidson N, Black DS. *Inequalities in health : the Black report*. Townsend P, Davidson N, Black DS, Great Britain. Working Group on Inequalities in H, editors. Harmondsworth: Penguin; 1982.
15. Ball K, Timperio A, Salmon J, Giles-Corti B, Roberts R, Crawford D. Personal, social and environmental determinants of educational inequalities in walking: a multilevel study. *Journal of Epidemiology & Community Health*. 2007;61(2):108-14.
16. Bartley M. *Health inequality: an introduction to concepts, theories and methods*: John Wiley & Sons; 2016.
17. House JS, Landis KR, Umberson D. Social relationships and health. *Science*. 1988;241(4865):540-5.
18. Shumaker SA, Brownell A. Toward a theory of social support: Closing conceptual gaps. *Journal of social issues*. 1984;40(4):11-36.
19. Baum FE, Ziersch AM. Social capital. *Journal of Epidemiology and Community Health*. 2003;57(5):320.
20. Kawachi I, Berkman L. Social cohesion, social capital, and health. *Social epidemiology*. 2000;174(7).
21. Kawachi I, Kennedy BP. Health and social cohesion: why care about income inequality? *Bmj*. 1997;314(7086):1037-40.

22. Krieger N. A glossary for social epidemiology. *Journal of Epidemiology & Community Health*. 2001;55(10):693-700.
23. Kawachi I, Subramanian S, Almeida-Filho N. A glossary for health inequalities. *Journal of Epidemiology & Community Health*. 2002;56(9):647-52.
24. Coburn D. Neoliberalism and health. *The Wiley Blackwell Encyclopedia of Health, Illness, Behavior, and Society*. 2014:1678-83.
25. Levac D, Colquhoun H, O'Brien KK. Scoping studies: advancing the methodology. *Implement Sci*. 2010;5(1):69.
26. Arksey H, O'Malley L. Scoping studies: towards a methodological framework. *International Journal of Social Research Methodology*. 2005;8(1):19-32.
27. Pathirana TI, Jackson CA. Socioeconomic status and multimorbidity: a systematic review and meta-analysis. *Australian and New Zealand journal of public health*. 2018;42(2):186-94.
28. Singh A, Harford J, Schuch HS, Watt RG, Peres MA. Theoretical basis and explanation for the relationship between area-level social inequalities and population oral health outcomes - A scoping review. *SSM Popul Health*. 2016;2:451-62.
29. Bonavita V, De Simone R. Towards a definition of comorbidity in the light of clinical complexity. *Neurological Sciences*. 2008;29(1):99-102.
30. Afshar S, Roderick PJ, Kowal P, Dimitrov BD, Hill AG. Multimorbidity and the inequalities of global ageing: a cross-sectional study of 28 countries using the World Health Surveys. *Bmc Public Health*. 2015;15.
31. Alaba O, Chola L. The social determinants of multimorbidity in South Africa. *Int J Equity Health*. 2013;12:63.
32. Alimohammadian M, Majidi A, Yaseri M, Ahmadi B, Islami F, Derakhshan M, et al. Multimorbidity as an important issue among women: Results of a gender difference investigation in a large population-based cross-sectional study in West Asia. *BMJ open*. 2017;7 (5) (no pagination)(e013548).
33. Banjare P, Pradhan J. Socio-Economic Inequalities in the Prevalence of Multi-Morbidity among the Rural Elderly in Bargarh District of Odisha (India). *PloS one*. 2014;9(6).
34. Chung RY, Mercer S, Lai FT, Yip BH, Wong MC, Wong SY. Socioeconomic Determinants of Multimorbidity: A Population-Based Household Survey of Hong Kong Chinese. *PloS one*. 2015;10(10):e0140040.
35. Demirchyan A, Khachadourian V, Armenian HK, Petrosyan V. Short and long term determinants of incident multimorbidity in a cohort of 1988 earthquake survivors in Armenia. *Intern*. 2013;12 (1) (no pagination)(68).
36. Garin N, Koyanagi A, Chatterji S, Tyrovolas S, Olaya B, Leonardi M, et al. Global Multimorbidity Patterns: A Cross-Sectional, Population-Based, Multi-Country Study. *The journals of gerontology Series A, Biological sciences and medical sciences*. 2016;71(2):205-14.
37. Habib RR, Hojeij S, Elzein K, Chaaban J, Seyfert K. Associations between life conditions and multi-morbidity in marginalized populations: the case of Palestinian refugees. *European journal of public health*. 2014;24(5):727-33.
38. Weimann A, Dai D, Oni T. A cross-sectional and spatial analysis of the prevalence of multimorbidity and its association with socioeconomic disadvantage in South Africa: A comparison between 2008 and 2012. *Social science & medicine (1982)*. 2016;163:144-56.
39. Ba NV, Minh HV, Quang LB, Chuyen NV, Ha BTT, Dai TQ, et al. Prevalence and correlates of multimorbidity among adults in border areas of the Central Highland Region of Vietnam, 2017. *J*. 2019;9:2235042X19853382.
40. Costa CDS, Flores TR, Wendt A, Neves RG, Tomasi E, Cesar JA, et al. Inequalities in multimorbidity among elderly: a population-based study in a city in Southern Brazil. *Cadernos de saude publica*. 2018;34(11):e00040718.
41. Cornish RP, Boyd A, Van Staa T, Salisbury C, Macleod J. Socio-economic position and childhood multimorbidity: A study using linkage between the Avon Longitudinal study of parents and children and the general practice research database. *Intern*. 2013;12 (1) (no pagination)(66).
42. Calderon-Larranaga A, Santoni G, Wang HX, Welmer AK, Rizzuto D, Vetrano DL, et al. Rapidly developing multimorbidity and disability in older adults: does social background matter? *Journal of internal medicine*. 2018;283(5):489-99.



- 1
- 2
- 3
- 4 43. Canizares M, Hogg-Johnson S, Gignac MAM, Glazier RH, Badley EM. Increasing
- 5 Trajectories of Multimorbidity Over Time: Birth Cohort Differences and the Role of Changes in
- 6 Obesity and Income. *The Journals Of Gerontology Series B, Psychological Sciences And Social*
- 7 *Sciences*. 2017.
- 8 44. Hayek S, Ifrah A, Enav T, Shohat T. Prevalence, Correlates, and Time Trends of Multiple
- 9 Chronic Conditions Among Israeli Adults: Estimates From the Israeli National Health Interview
- 10 Survey, 2014-2015. *Preventing chronic disease*. 2017;14:E64.
- 11 45. Schäfer I, Hansen H, Schön G, Höfels S, Altiner A, Dahlhaus A, et al. The influence of age,
- 12 gender and socio-economic status on multimorbidity patterns in primary care. first results from the
- 13 multicare cohort study. *BMC Health Services Research*. 2012;12(1).
- 14 46. Tomasdottir MO, Sigurdsson JA, Petursson H, Kirkengen AL, Ivar Lund Nilsen T, Hetlevik I,
- 15 et al. Does existential unease' predict adult multimorbidity? Analytical cohort study on embodiment
- 16 based on the Norwegian HUNT population. *BMJ open*. 2016;6 (11) (no pagination)(e012602).
- 17 47. Tucker-Seeley RD, Li Y, Sorensen G, Subramanian SV. Lifecourse socioeconomic
- 18 circumstances and multimorbidity among older adults. *BMC Public Health*. 2011;11:313.
- 19 48. McLean G, Gunn J, Wyke S, Guthrie B, Watt GC, Blane DN, et al. The influence of
- 20 socioeconomic deprivation on multimorbidity at different ages: a cross-sectional study. *The British*
- 21 *journal of general practice : the journal of the Royal College of General Practitioners*.
- 22 2014;64(624):e440-7.
- 23 49. Park B, Lee HA, Park H. Use of latent class analysis to identify multimorbidity patterns and
- 24 associated factors in Korean adults aged 50 years and older. *PloS one*. 2019;14 (11) (no
- 25 pagination)(e0216259).
- 26 50. Puth MT, Weckbecker K, Schmid M, Munster E. Prevalence of multimorbidity in Germany:
- 27 impact of age and educational level in a cross-sectional study on 19,294 adults. *BMC Public Health*.
- 28 2017;17(1):826.
- 29 51. Mondor L, Cohen D, Khan AI, Wodchis WP. Income inequalities in multimorbidity
- 30 prevalence in Ontario, Canada: A decomposition analysis of linked survey and health administrative
- 31 data. *Intern*. 2018;17 (1) (no pagination)(90).
- 32 52. Agborsangaya CB, Lau D, Lahtinen M, Cooke T, Johnson JA. Multimorbidity prevalence and
- 33 patterns across socioeconomic determinants: a cross-sectional survey. *BMC public health*.
- 34 2012;12:201.
- 35 53. Johnston MC, Black C, Mercer SW, Prescott GJ, Crilly MA. Impact of educational attainment
- 36 on the association between social class at birth and multimorbidity in middle age in the Aberdeen
- 37 Children of the 1950s cohort study. *BMJ open*. 2019;9(1):e024048.
- 38 54. Hill AB. THE ENVIRONMENT AND DISEASE: ASSOCIATION OR CAUSATION?
- 39 *Proceedings of the Royal Society of Medicine*. 1965;58:295-300.
- 40 55. VanderWeele TJ. *Explanation in causal inference : methods for mediation and interaction*:
- 41 *New York Oxford University Press, [2015]; 2015*.
- 42 56. VanderWeele TJ. *Mediation analysis: a practitioner's guide*. *Annual review of public health*.
- 43 2016;37:17-32.
- 44
- 45
- 46
- 47
- 48
- 49
- 50
- 51
- 52
- 53
- 54
- 55
- 56
- 57
- 58
- 59
- 60

Table 1. Study selection criteria.

| Inclusion criteria                                                                                                                                                                                                                                                                                                                                                                                                                                        | Exclusion criteria                                                                                                                                                                                                                                                                                  |
|-----------------------------------------------------------------------------------------------------------------------------------------------------------------------------------------------------------------------------------------------------------------------------------------------------------------------------------------------------------------------------------------------------------------------------------------------------------|-----------------------------------------------------------------------------------------------------------------------------------------------------------------------------------------------------------------------------------------------------------------------------------------------------|
| <ul style="list-style-type: none"> <li>-Studies with participants from any age group</li> <li>-Community representative participants</li> <li>-Individual and population-based epidemiological studies looking at the association between socio-economic disadvantage and multi-morbidity</li> <li>-Intervention studies involving examining moderators or mediators derived from theoretical constructs</li> <li>-Studies in English language</li> </ul> | <ul style="list-style-type: none"> <li>-Studies on institutionalised individuals</li> <li>-Studies on comorbidity</li> <li>-Qualitative studies</li> <li>-Study protocols, editorials and commentaries that do not report on association between social disadvantage and multi-morbidity</li> </ul> |



Table 2. Summary characteristics of included studies

| Study                    | Study design    | Location                          | Population focus        | Assessment of multimorbidity – (Presence/ Nature/Extent/ Both) | Measure of Socioeconomic disadvantage                                | Conclusion on socioeconomic inequalities in multimorbidity                                                                                                            |
|--------------------------|-----------------|-----------------------------------|-------------------------|----------------------------------------------------------------|----------------------------------------------------------------------|-----------------------------------------------------------------------------------------------------------------------------------------------------------------------|
| Afshar et al. 2015       | Cross-sectional | 28 Low to middle-income countries | Adults aged 18 and over | Presence of multimorbidity.                                    | Level of education.                                                  | Level of education was negatively associated with presence of multimorbidity.                                                                                         |
| Agborsangaya et al. 2012 | Cross-sectional | Canada                            | Adults aged 18 and over | Presence of multimorbidity.                                    | Educational level and annual household income.                       | Education and household income were both negatively associated with presence of multimorbidity.                                                                       |
| Alaba et al. 2013        | Cross-sectional | South Africa                      | Adults aged 18 and over | Presence or absence of multimorbidity.                         | Years of schooling, household income, social assistance, employment. | Household income and receiving social assistance were positively associated with presence of multimorbidity. The association was absent for employment and education. |

| Study                      | Study design    | Location | Population focus                   | Assessment of multimorbidity – (Presence/Nature/Extent/Both)        | Measure of Socioeconomic disadvantage                                                                                                                                                                                    | Conclusion on socioeconomic inequalities in multimorbidity                                                                                                                                                                   |
|----------------------------|-----------------|----------|------------------------------------|---------------------------------------------------------------------|--------------------------------------------------------------------------------------------------------------------------------------------------------------------------------------------------------------------------|------------------------------------------------------------------------------------------------------------------------------------------------------------------------------------------------------------------------------|
| Alimohammadian et al. 2017 | Cross-sectional | Iran     | Adults aged 40-75 years            | Presence of multimorbidity.                                         | Socioeconomic status: derived from a cluster analysis with the use of similarities for family assets, ethnicity, sex, employment status, age at onset of the first job, home ownership status and house size. Education. | Socioeconomic status and education were negatively associated with presence of multimorbidity in males and females. Both associations were stronger in females. Prevalence ratio of multimorbidity was higher in unemployed. |
| Ba et al. 2019             | Cross-sectional | Vietnam  | Individuals aged 15 years and over | Presence of multimorbidity.                                         | Educational level and occupational status                                                                                                                                                                                | Educational level and occupational status were inversely associated with multimorbidity.                                                                                                                                     |
| Banjare et al. 2014        | Cross-sectional | India    | Adults aged over 60 years          | Extent of multimorbidity classified as: having no morbidity, having | Education, state of economic independence, quintiles of wealth, living                                                                                                                                                   | No association was found between wealth index, education, living                                                                                                                                                             |

1  
2  
3  
4  
5  
6  
7  
8  
9  
10  
11  
12  
13  
14  
15  
16  
17  
18  
19  
20  
21  
22  
23  
24  
25  
26  
27  
28  
29  
30  
31  
32  
33  
34  
35  
36  
37  
38  
39  
40  
41  
42  
43  
44  
45  
46

| Study                          | Study design | Location | Population focus              | Assessment of multimorbidity – (Presence/ Nature/Extent/ Both)                                                                                                                  | Measure of Socioeconomic disadvantage | Conclusion on socioeconomic inequalities in multimorbidity                                                                                                       |
|--------------------------------|--------------|----------|-------------------------------|---------------------------------------------------------------------------------------------------------------------------------------------------------------------------------|---------------------------------------|------------------------------------------------------------------------------------------------------------------------------------------------------------------|
|                                |              |          |                               | one morbidity, having two morbidities and having three or more morbidities.                                                                                                     | arrangement and caste.                | arrangement and multimorbidity, except for caste and state of economic independence, which were negatively associated with odds of multimorbidity                |
| Calderon-Larrañaga et al. 2018 | Longitudinal | Sweden   | Adults aged 60 years and over | Presence of multimorbidity was explored as rapid or slow development of multiple chronic conditions according to the cumulative rate of chronic diseases and time to follow-up. | Educational level and occupation      | Education was negatively associated with rapid development of multimorbidity, Manual workers had a faster development of multimorbidity than non-manual workers. |
| Canizares et al. 2017          | Longitudinal | Canada   | Adults aged 20-69             | Presence and extent of multimorbidity.                                                                                                                                          | Education, and household income.      | Household income was negatively associated with                                                                                                                  |

| Study             | Study design    | Location   | Population focus                | Assessment of multimorbidity – (Presence/Nature/Extent/Both) | Measure of Socioeconomic disadvantage                                            | Conclusion on socioeconomic inequalities in multimorbidity                                                                                                           |
|-------------------|-----------------|------------|---------------------------------|--------------------------------------------------------------|----------------------------------------------------------------------------------|----------------------------------------------------------------------------------------------------------------------------------------------------------------------|
|                   |                 |            |                                 |                                                              |                                                                                  | presence of multimorbidity. No association was found between education and multimorbidity.                                                                           |
| Chung et al. 2015 | Cross-sectional | China      | Adults aged 15 years and older  | Presence and extent of multimorbidity.                       | Household income, educational attainment, employment status and type of housing. | Household income, educational attainment, employment and type of housing were negatively associated with presence of multimorbidity and count of chronic conditions. |
| Congdon, 2016     | Cross-sectional | London, UK | Adults aged between 65-75 years | Presence of multimorbidity.                                  | Area-level socioeconomic deprivation                                             | Area-level of deprivation was positively associated with multimorbidity rates.                                                                                       |

1  
2  
3  
4  
5  
6  
7  
8  
9  
10  
11  
12  
13  
14  
15  
16  
17  
18  
19  
20  
21  
22  
23  
24  
25  
26  
27  
28  
29  
30  
31  
32  
33  
34  
35  
36  
37  
38  
39  
40  
41  
42  
43  
44  
45  
46

| Study               | Study design | Location    | Population focus            | Assessment of multimorbidity – (Presence/Nature/Extent/Both) | Measure of Socioeconomic disadvantage                                                                                                                                   | Conclusion on socioeconomic inequalities in multimorbidity                                                                                                                                                                                                                                                                                                                      |
|---------------------|--------------|-------------|-----------------------------|--------------------------------------------------------------|-------------------------------------------------------------------------------------------------------------------------------------------------------------------------|---------------------------------------------------------------------------------------------------------------------------------------------------------------------------------------------------------------------------------------------------------------------------------------------------------------------------------------------------------------------------------|
| Cornish et al. 2013 | Longitudinal | Bristol, UK | Children aged 0 to 18 years | Presence and extent of multimorbidity.                       | Parent’s educational level. Occupational social class. Housing tenure. Family adversity index during pregnancy. Townsend score as measure of socioeconomic deprivation. | Maternal education was negatively associated with multimorbidity in children and positively associated in adolescents. Occupation and family adversity index were not associated with multimorbidity. Townsend score was negatively associated with presence and number of chronic conditions. Children whose parents reported being renters had higher odds of multimorbidity. |

For peer review only

| Study                  | Study design    | Location | Population focus                  | Assessment of multimorbidity – (Presence/ Nature/Extent/ Both) | Measure of Socioeconomic disadvantage                                                         | Conclusion on socioeconomic inequalities in multimorbidity                                                                                                                                    |
|------------------------|-----------------|----------|-----------------------------------|----------------------------------------------------------------|-----------------------------------------------------------------------------------------------|-----------------------------------------------------------------------------------------------------------------------------------------------------------------------------------------------|
| Costa et al. 2018      | Cross-sectional | Brazil   | Adults aged 60 years and over     | Presence and nature of multimorbidity                          | Educational level and monthly income per capita (National Economic Index)                     | Education level and quintiles of economic index were inversely associated with multimorbidity.                                                                                                |
| Demirchyan et al. 2013 | Longitudinal    | Armenia  | Adults aged 37 to 90 years        | Presence of multimorbidity.                                    | Education, perceived low affordability of healthcare services and perceived living standards. | Level of education was negatively associated with multimorbidity. Perceived poor living standard and current low affordability of health care were positively associated with multimorbidity. |
| Diaz et al. 2015       | Cross-sectional | Norway   | Immigrants aged 15 years and over | Presence of multimorbidity.                                    | Personal income level. Reason for migration.                                                  | Income was negatively associated with odds of multimorbidity in family reunification, labour and                                                                                              |

1  
2  
3  
4  
5  
6  
7  
8  
9  
10  
11  
12  
13  
14  
15  
16  
17  
18  
19  
20  
21  
22  
23  
24  
25  
26  
27  
28  
29  
30  
31  
32  
33  
34  
35  
36  
37  
38  
39  
40  
41  
42  
43  
44  
45  
46

| Study             | Study design    | Location                               | Population focus            | Assessment of multimorbidity – (Presence/ Nature/Extent/ Both) | Measure of Socioeconomic disadvantage | Conclusion on socioeconomic inequalities in multimorbidity                                                                                                                                                                                                                          |
|-------------------|-----------------|----------------------------------------|-----------------------------|----------------------------------------------------------------|---------------------------------------|-------------------------------------------------------------------------------------------------------------------------------------------------------------------------------------------------------------------------------------------------------------------------------------|
|                   |                 |                                        |                             |                                                                |                                       | refugees’ immigrants. Income was positively associated with multimorbidity in education immigrants.                                                                                                                                                                                 |
| Garin et al. 2016 | Cross-sectional | 9 low to upper middle-income countries | Adults aged 50 years of age | Presence of multimorbidity.                                    | Household income, education           | Income was negatively associated with multimorbidity in China, Spain, Finland and Poland and positively associated in Ghana, Russia and South Africa. Income was not associated with multimorbidity in India and Mexico. Education was negatively associated with multimorbidity in |

For peer review only

| Study             | Study design    | Location | Population focus                                      | Assessment of multimorbidity – (Presence/ Nature/Extent/ Both) | Measure of Socioeconomic disadvantage | Conclusion on socioeconomic inequalities in multimorbidity                                                                                                                                                                 |
|-------------------|-----------------|----------|-------------------------------------------------------|----------------------------------------------------------------|---------------------------------------|----------------------------------------------------------------------------------------------------------------------------------------------------------------------------------------------------------------------------|
|                   |                 |          |                                                       |                                                                |                                       | China, Finland. India, Poland, Russia, South-Africa and Spain. In Mexico and Ghana education was not associated with multimorbidity.                                                                                       |
| Habib et al. 2014 | Cross-sectional | Lebanon  | Palestinian refugees aged between 14 and 87 years old | Presence and extent of multimorbidity.                         | Educational attainment, wealth index. | Educational attainment was negatively associated with multimorbidity. Respondents from the lowest wealth index showed higher risk of multimorbidity (two or three or more poor health outcomes) than those in the highest. |
| Hayek et al. 2017 | Longitudinal    | Israel   | Adults aged 21 years and over                         | Presence of multimorbidity.                                    | Monthly household income              | Household income was negatively                                                                                                                                                                                            |



| Study               | Study design | Location  | Population focus          | Assessment of multimorbidity – (Presence/ Nature/Extent/ Both)                                                                | Measure of Socioeconomic disadvantage        | Conclusion on socioeconomic inequalities in multimorbidity                                                                                                                                                                                                                                              |
|---------------------|--------------|-----------|---------------------------|-------------------------------------------------------------------------------------------------------------------------------|----------------------------------------------|---------------------------------------------------------------------------------------------------------------------------------------------------------------------------------------------------------------------------------------------------------------------------------------------------------|
|                     |              |           |                           |                                                                                                                               | and years of schooling                       | associated with presence of multimorbidity. Education was not associated with multimorbidity.                                                                                                                                                                                                           |
| Jackson et al. 2016 | Longitudinal | Australia | Women aged 45 to 50 years | Multimorbidity patterns were classified as psychosomatic, musculoskeletal, cardiometabolic, cancer and respiratory syndromes. | Education, occupation and income management. | Low education and difficulties managing income were associated with higher odds of psychosomatic, musculoskeletal and cardiometabolic patterns of multimorbidity. Occupation was not associated with any pattern of multimorbidity. Cancer and respiratory patterns were not associated with any of the |

For peer review only

1  
2  
3  
4  
5  
6  
7  
8  
9  
10  
11  
12  
13  
14  
15  
16  
17  
18  
19  
20  
21  
22  
23  
24  
25  
26  
27  
28  
29  
30  
31  
32  
33  
34  
35  
36  
37  
38  
39  
40  
41  
42  
43  
44  
45  
46

| Study                   | Study design | Location    | Population focus              | Assessment of multimorbidity – (Presence/Nature/Extent/Both) | Measure of Socioeconomic disadvantage                                     | Conclusion on socioeconomic inequalities in multimorbidity                                                                                            |
|-------------------------|--------------|-------------|-------------------------------|--------------------------------------------------------------|---------------------------------------------------------------------------|-------------------------------------------------------------------------------------------------------------------------------------------------------|
|                         |              |             |                               |                                                              |                                                                           | socioeconomic measures                                                                                                                                |
| Johnston et al. 2019    | Longitudinal | Scotland    | Adults aged 45 to 51 years    | Presence of multimorbidity                                   | Father's occupation during childhood. Educational attainment in adulthood | Inverse association between father's occupational class and multimorbidity                                                                            |
| Katikireddi et al. 2017 | Longitudinal | Scotland    | Adults aged 35 to 75 years    | Presence and extent of multimorbidity.                       | Area-based deprivation level.                                             | Area-based deprivation level was positively associated with multimorbidity (2 and 3 or more chronic conditions).                                      |
| Ki et al. 2017          | Longitudinal | South Korea | Adults aged 30 years and over | Presence and extent of multimorbidity.                       | Educational attainment, employment status and relative poverty index.     | Participants with lower socio-economic status showed higher odds of multimorbidity. Stronger associations were generally observed with more diseases, |

1  
2  
3  
4  
5  
6  
7  
8  
9  
10  
11  
12  
13  
14  
15  
16  
17  
18  
19  
20  
21  
22  
23  
24  
25  
26  
27  
28  
29  
30  
31  
32  
33  
34  
35  
36  
37  
38  
39  
40  
41  
42  
43  
44  
45  
46

| Study              | Study design    | Location | Population focus              | Assessment of multimorbidity – (Presence/ Nature/Extent/ Both)                                                                                               | Measure of Socioeconomic disadvantage | Conclusion on socioeconomic inequalities in multimorbidity                                                                                                                                                        |
|--------------------|-----------------|----------|-------------------------------|--------------------------------------------------------------------------------------------------------------------------------------------------------------|---------------------------------------|-------------------------------------------------------------------------------------------------------------------------------------------------------------------------------------------------------------------|
|                    |                 |          |                               |                                                                                                                                                              |                                       | particularly at ages 50s, 60s, and 70s, but the strongest associations were observed at 30s for poverty index (positive trend) and employment status (higher odds of multimorbidity in non-employed individuals). |
| McLean et al. 2014 | Cross-sectional | Scotland | Adults aged 25 years and over | Presence and pattern of multimorbidity. Pattern of multimorbidity was classified as physical only, mental only and mixed physical and mental multimorbidity. | Area-based deprivation.               | Area-based deprivation was positively associated with presence of multimorbidity. Physical only multimorbidity was similar across all areas. Area-based deprivation was positively associated with                |

| Study               | Study design    | Location              | Population focus               | Assessment of multimorbidity – (Presence/Nature/Extent/Both) | Measure of Socioeconomic disadvantage                | Conclusion on socioeconomic inequalities in multimorbidity                                               |
|---------------------|-----------------|-----------------------|--------------------------------|--------------------------------------------------------------|------------------------------------------------------|----------------------------------------------------------------------------------------------------------|
|                     |                 |                       |                                |                                                              |                                                      | mental-only and mixed physical and mental multimorbidity patterns.                                       |
| Mondor et al. 2018  | Cross-sectional | Canada                | Adults aged 18 years and older | Presence of multimorbidity                                   | Household income and educational level inequalities. | Inverse association between multimorbidity and socioeconomic inequalities (income and educational level) |
| Nielsen et al. 2017 | Cross-sectional | 15 European countries | Adults aged 50 years and over  | Presence of multimorbidity.                                  | Educational level, household income.                 | Household income and educational level were negatively correlated with multimorbidity.                   |
| Nunes et al. 2017   | Cross-sectional | Brazil                | Adults aged 18 years and over  | Presence of multimorbidity.                                  | State level of education and wealth quintiles.       | Multimorbidity was not associated with wealth quintiles but presented a negative association with        |

1  
2  
3  
4  
5  
6  
7  
8  
9  
10  
11  
12  
13  
14  
15  
16  
17  
18  
19  
20  
21  
22  
23  
24  
25  
26  
27  
28  
29  
30  
31  
32  
33  
34  
35  
36  
37  
38  
39  
40  
41  
42  
43  
44  
45  
46

| Study                       | Study design    | Location    | Population focus               | Assessment of multimorbidity – (Presence/Nature/Extent/Both) | Measure of Socioeconomic disadvantage                                             | Conclusion on socioeconomic inequalities in multimorbidity                                                                                                                            |
|-----------------------------|-----------------|-------------|--------------------------------|--------------------------------------------------------------|-----------------------------------------------------------------------------------|---------------------------------------------------------------------------------------------------------------------------------------------------------------------------------------|
|                             |                 |             |                                |                                                              |                                                                                   | education regardless Brazilian regions.                                                                                                                                               |
| Park et al. 2019            | Cross-sectional | South Korea | Adults aged 50 years and older | Presence and nature of multimorbidity                        | Household income, educational level and occupation                                | Household income, educational and occupational level were inversely associated with both, cardiometabolic and arthritis/asthma/allergy/depression/thyroid patterns of multimorbidity. |
| Prazeres and Santiago, 2015 | Cross-sectional | Portugal    | Adults aged 18 years and older | Extent and presence of multimorbidity.                       | Years of educations, professional status and self-perceived Socioeconomic status. | Education was negatively associated with multimorbidity (2 and 3 or more chronic conditions). Monthly income was not associated with multimorbidity.                                  |

| Study               | Study design    | Location | Population focus               | Assessment of multimorbidity – (Presence/ Nature/Extent/ Both) | Measure of Socioeconomic disadvantage  | Conclusion on socioeconomic inequalities in multimorbidity                                                                       |
|---------------------|-----------------|----------|--------------------------------|----------------------------------------------------------------|----------------------------------------|----------------------------------------------------------------------------------------------------------------------------------|
|                     |                 |          |                                |                                                                |                                        | Higher odds of multimorbidity (2 or 3 or more chronic conditions) were found on pensioners/retired , unemployed and housewives.  |
| Puth et al. 2017    | Cross-sectional | Germany  | Adults aged 18 years and older | Presence of multimorbidity                                     | Level of education                     | People with a lower educational level showed higher rates of multimorbidity compared with those with a higher educational level. |
| Roberts et al. 2015 | Cross-sectional | Canada   | Adults aged 20 years and older | Presence and extent of multimorbidity                          | Educational level and household income | Negative association between education, household income and multimorbidity (2 or more and 3 or                                  |

1  
2  
3  
4  
5  
6  
7  
8  
9  
10  
11  
12  
13  
14  
15  
16  
17  
18  
19  
20  
21  
22  
23  
24  
25  
26  
27  
28  
29  
30  
31  
32  
33  
34  
35  
36  
37  
38  
39  
40  
41  
42  
43  
44  
45  
46

| Study               | Study design | Location | Population focus               | Assessment of multimorbidity – (Presence/ Nature/Extent/ Both)                                                                                                      | Measure of Socioeconomic disadvantage                         | Conclusion on socioeconomic inequalities in multimorbidity                                                                                                                                                                                                                                                                                  |
|---------------------|--------------|----------|--------------------------------|---------------------------------------------------------------------------------------------------------------------------------------------------------------------|---------------------------------------------------------------|---------------------------------------------------------------------------------------------------------------------------------------------------------------------------------------------------------------------------------------------------------------------------------------------------------------------------------------------|
|                     |              |          |                                |                                                                                                                                                                     |                                                               | more chronic conditions)                                                                                                                                                                                                                                                                                                                    |
| Schäfer et al. 2012 | Longitudinal | Germany  | Adults aged 65 years and older | Presence and two patterns of multimorbidity were explored including cardiometabolic disorders (CMD) and anxiety, depression, somatoform disorders and pain (ADS/P). | Education, autonomy on former occupation and household income | Negative association between number of chronic conditions and education, degree of autonomy at former occupation and household income. Negative association between number of CMD, household income educational level. Negative association between household income, educational level and number of ADS/P. Associations were stronger for |

| Study                     | Study design    | Location      | Population focus                                 | Assessment of multimorbidity – (Presence/Nature/Extent/Both) | Measure of Socioeconomic disadvantage                                                                                         | Conclusion on socioeconomic inequalities in multimorbidity                                                                |
|---------------------------|-----------------|---------------|--------------------------------------------------|--------------------------------------------------------------|-------------------------------------------------------------------------------------------------------------------------------|---------------------------------------------------------------------------------------------------------------------------|
|                           |                 |               |                                                  |                                                              |                                                                                                                               | number of CMDs and socioeconomic variables.                                                                               |
| Stanley et al. 2018       | Cross-sectional | New Zealand   | Adults aged 18 years and older                   | Presence of multimorbidity.                                  | Area based measure of socioeconomic deprivation                                                                               | Area-based deprivation was positively associated with multimorbidity.                                                     |
| Stokes et al. 2018        | Cross-sectional | New Zealand   | Pacific and Maori adults aged 35 years and older | Presence of multimorbidity.                                  | Area based measure of socioeconomic deprivation                                                                               | Positive association between area of deprivation, and multimorbidity.                                                     |
| Tomasdottir et al. 2016   | Longitudinal    | Norway        | Adults aged 20-59 years                          | Presence of multimorbidity.                                  | Financial hardship (worries)                                                                                                  | Financial hardship was positively associated with multimorbidity.                                                         |
| Tucker-Seeley et al. 2011 | Longitudinal    | United States | Adults aged 50 years and over                    | Presence and extent of multimorbidity.                       | Childhood financial hardship (yes/no). Average lifetime earnings during young and middle adulthood. Educational attainment as | Childhood financial hardship was positively associated with number of chronic conditions. Education and lifetime earnings |



1  
2  
3  
4  
5  
6  
7  
8  
9  
10  
11  
12  
13  
14  
15  
16  
17  
18  
19  
20  
21  
22  
23  
24  
25  
26  
27  
28  
29  
30  
31  
32  
33  
34  
35  
36  
37  
38  
39  
40  
41  
42  
43  
44  
45  
46

| Study              | Study design    | Location     | Population focus               | Assessment of multimorbidity – (Presence/ Nature/Extent/ Both) | Measure of Socioeconomic disadvantage | Conclusion on socioeconomic inequalities in multimorbidity                                                                                                                                                                                                                     |
|--------------------|-----------------|--------------|--------------------------------|----------------------------------------------------------------|---------------------------------------|--------------------------------------------------------------------------------------------------------------------------------------------------------------------------------------------------------------------------------------------------------------------------------|
|                    |                 |              |                                |                                                                | indicator of adult SES                | were negatively associated with multimorbidity. The association between childhood financial hardship was modified by lifetime financial earnings, an increase in 10000 USD decreased the expected number of morbidities in adults who experienced childhood financial hardship |
| Violan et al. 2014 | Cross-sectional | Spain        | Adults aged 19 years and older | Presence of multimorbidity.                                    | Area-level of deprivation             | Positive association of multimorbidity and area-level of deprivation                                                                                                                                                                                                           |
| Weiman et al. 2013 | Cross-sectional | South Africa | People aged 15 years and older | Presence of multimorbidity.                                    | Multidimensional poverty index        | Positive association between poverty                                                                                                                                                                                                                                           |

| Study | Study design | Location | Population focus | Assessment of multimorbidity – (Presence/ Nature/Extent/ Both) | Measure of Socioeconomic disadvantage | Conclusion on socioeconomic inequalities in multimorbidity |
|-------|--------------|----------|------------------|----------------------------------------------------------------|---------------------------------------|------------------------------------------------------------|
|       |              |          |                  |                                                                |                                       | index and multimorbidity                                   |

For peer review only

Table 3. Types of theories and context of application

| Study                          | Type of theory              | Inferred/<br>Explicitly<br>mentioned | Context of use                                                                                                                                                                                                                                                                                                                                                                                                                                                                                                                                                                                                  | Explanatory<br>potential tested |
|--------------------------------|-----------------------------|--------------------------------------|-----------------------------------------------------------------------------------------------------------------------------------------------------------------------------------------------------------------------------------------------------------------------------------------------------------------------------------------------------------------------------------------------------------------------------------------------------------------------------------------------------------------------------------------------------------------------------------------------------------------|---------------------------------|
| Johnston et al. 2019           | Life course theory          | Explicitly mentioned                 | <p>Introduction: authors framed the importance of understanding the role of adulthood educational attainment in the pathway between childhood SES and multimorbidity.</p> <p>Methods: authors included the theoretical pathway (life course through adulthood educational attainment) in the methods section to plan their analyses.</p> <p>Results: authors reported partial mediatory effect of educational attainment during adulthood in the association between childhood SES and multimorbidity.</p> <p>Discussion: authors explicitly mentioned the life course theory in explaining their findings.</p> | Yes                             |
| Calderon-Larrañaga et al. 2018 | Psychosocial/social support | Explicitly mentioned                 | Methods: authors measured social network as a proxy for social support and used this variable as an exposure.                                                                                                                                                                                                                                                                                                                                                                                                                                                                                                   | No                              |

| Study                      | Type of theory | Inferred/<br>Explicitly<br>mentioned | Context of use                                                                                                                                                                                                                                                                                                                                                                                                                                                                                                                                                                                                                                                                                                                                                                           | Explanatory<br>potential tested |
|----------------------------|----------------|--------------------------------------|------------------------------------------------------------------------------------------------------------------------------------------------------------------------------------------------------------------------------------------------------------------------------------------------------------------------------------------------------------------------------------------------------------------------------------------------------------------------------------------------------------------------------------------------------------------------------------------------------------------------------------------------------------------------------------------------------------------------------------------------------------------------------------------|---------------------------------|
| Mondor et al. 2018         | Behavioural    | Explicitly<br>mentioned              | <p>Introduction: authors stated within their objectives to “identify the relative contribution of key determinants of multimorbidity to this inequality including ... lifestyle ... factors”.</p> <p>Methods: authors included health-related behaviours (physical activity, smoking and body mass index) in their analysis.</p> <p>Results: authors reported the relative contribution of physical activity, smoking and body mass index in the association between income inequalities and multimorbidity.</p> <p>Discussion: authors discussed the role of physical activity as the major behavioural contributor to income related inequalities in multimorbidity.</p> <p>Overall, physical activity explained only a small proportion of income inequalities in multimorbidity.</p> | Yes                             |
| Alimohammadian et al. 2017 | Behavioural    | Explicitly<br>mentioned              | Discussion: authors mentioned lifestyle/behavioural factors as possible pathways between low SES and multimorbidity.                                                                                                                                                                                                                                                                                                                                                                                                                                                                                                                                                                                                                                                                     | No                              |

1  
2  
3  
4  
5  
6  
7  
8  
9  
10  
11  
12  
13  
14  
15  
16  
17  
18  
19  
20  
21  
22  
23  
24  
25  
26  
27  
28  
29  
30  
31  
32  
33  
34  
35  
36  
37  
38  
39  
40  
41  
42  
43  
44  
45  
46

| Study                   | Type of theory                   | Inferred/<br>Explicitly<br>mentioned | Context of use                                                                                                                                                                                                                                                                                                                       | Explanatory<br>potential tested |
|-------------------------|----------------------------------|--------------------------------------|--------------------------------------------------------------------------------------------------------------------------------------------------------------------------------------------------------------------------------------------------------------------------------------------------------------------------------------|---------------------------------|
| Katikireddi et al. 2017 | Life course and behavioural      | Explicitly mentioned                 | Methods: behavioural factors (smoking, alcohol use, type of diet, physical activity and BMI) were added to the model as mediators between area level of deprivation and inequalities in multimorbidity outcomes. The effect of area-based deprivation over the life course and development of multimorbidity was also explored.      | Yes                             |
| Tomasdottir et al. 2016 | Sense of coherence- psychosocial | Explicitly mentioned                 | Methods: a selection of binary variables expressing perception of existential unease was used as an indicator of sense of coherence. These variables were used as exposures.                                                                                                                                                         | No                              |
| Chung et al. 2015       | Materialist, behavioural         | Explicitly mentioned                 | Methods: authors analysed the possible mediation between socio-economic measures (type of housing) and multimorbidity through financial burden. The authors also measured the association between smoking status and multimorbidity but not as a pathway between SES and presence of multimorbidity or number of chronic conditions. | Yes                             |

| Study                     | Type of theory               | Inferred/<br>Explicitly<br>mentioned | Context of use                                                                                                                                                               | Explanatory<br>potential tested |
|---------------------------|------------------------------|--------------------------------------|------------------------------------------------------------------------------------------------------------------------------------------------------------------------------|---------------------------------|
| Agborsangaya et al. 2012  | Psychosocial                 | Explicitly mentioned                 | Methods: family structure used as confounder variable.<br>Discussion: authors mentioned the importance of family support as protective factor for developing multimorbidity. | No                              |
| Tucker-Seeley et al. 2011 | Life course and materialist  | Explicitly mentioned                 | Methods: Lifetime earnings was fitted as an effect modifier for the association between childhood financial hardship and presence of multimorbidity                          | No                              |
| Costa et al. 2018         | Behavioural                  | Inferred                             | Discussion: authors referred to health-related behaviours as possible explanations for their findings                                                                        | No                              |
| Canizares et al. 2017     | Behavioural                  | Inferred                             | Methods: the authors adjusted for behavioural risk factors to explain age cohort differences in multimorbidity prevalence                                                    | No                              |
| Puth et al. 2017          | Behavioural                  | Inferred                             | Discussion: the authors proposed lifestyle habits as explanatory variables for the association between educational level and multimorbidity.                                 | No                              |
| Afshar et al. 2015        | Behavioural and psychosocial | Inferred                             | Discussion: used in this section to explain the findings                                                                                                                     | No                              |

| Study                  | Type of theory                                     | Inferred/<br>Explicitly<br>mentioned | Context of use                                                                                                                                                                                                                                        | Explanatory<br>potential tested |
|------------------------|----------------------------------------------------|--------------------------------------|-------------------------------------------------------------------------------------------------------------------------------------------------------------------------------------------------------------------------------------------------------|---------------------------------|
| Banjare et al. 2014    | Behavioural                                        | Inferred                             | Methods: lifestyle factors (smoking and chewing tobacco) were fitted in the model as independent variables, but no mediation analysis was tested.                                                                                                     | No                              |
| Alaba et al. 2013      | Behavioural,<br>psychosocial and<br>social capital | Inferred                             | Methods: authors included smoking, obesity, depression, health facility visits and civic participation as risk factors for multimorbidity but did not used them as explanatory variables of the association between SES and multimorbidity.           | No                              |
| Demirchyan et al. 2013 | Psychosocial,<br>behavioural and<br>materialist    | Inferred                             | Methods: Authors measured the mediation of stressful life events between age and onset of multimorbidity. Discussion: materialist, psychosocial and behavioural theories were used in the discussion section as possible explanations of the findings | No                              |

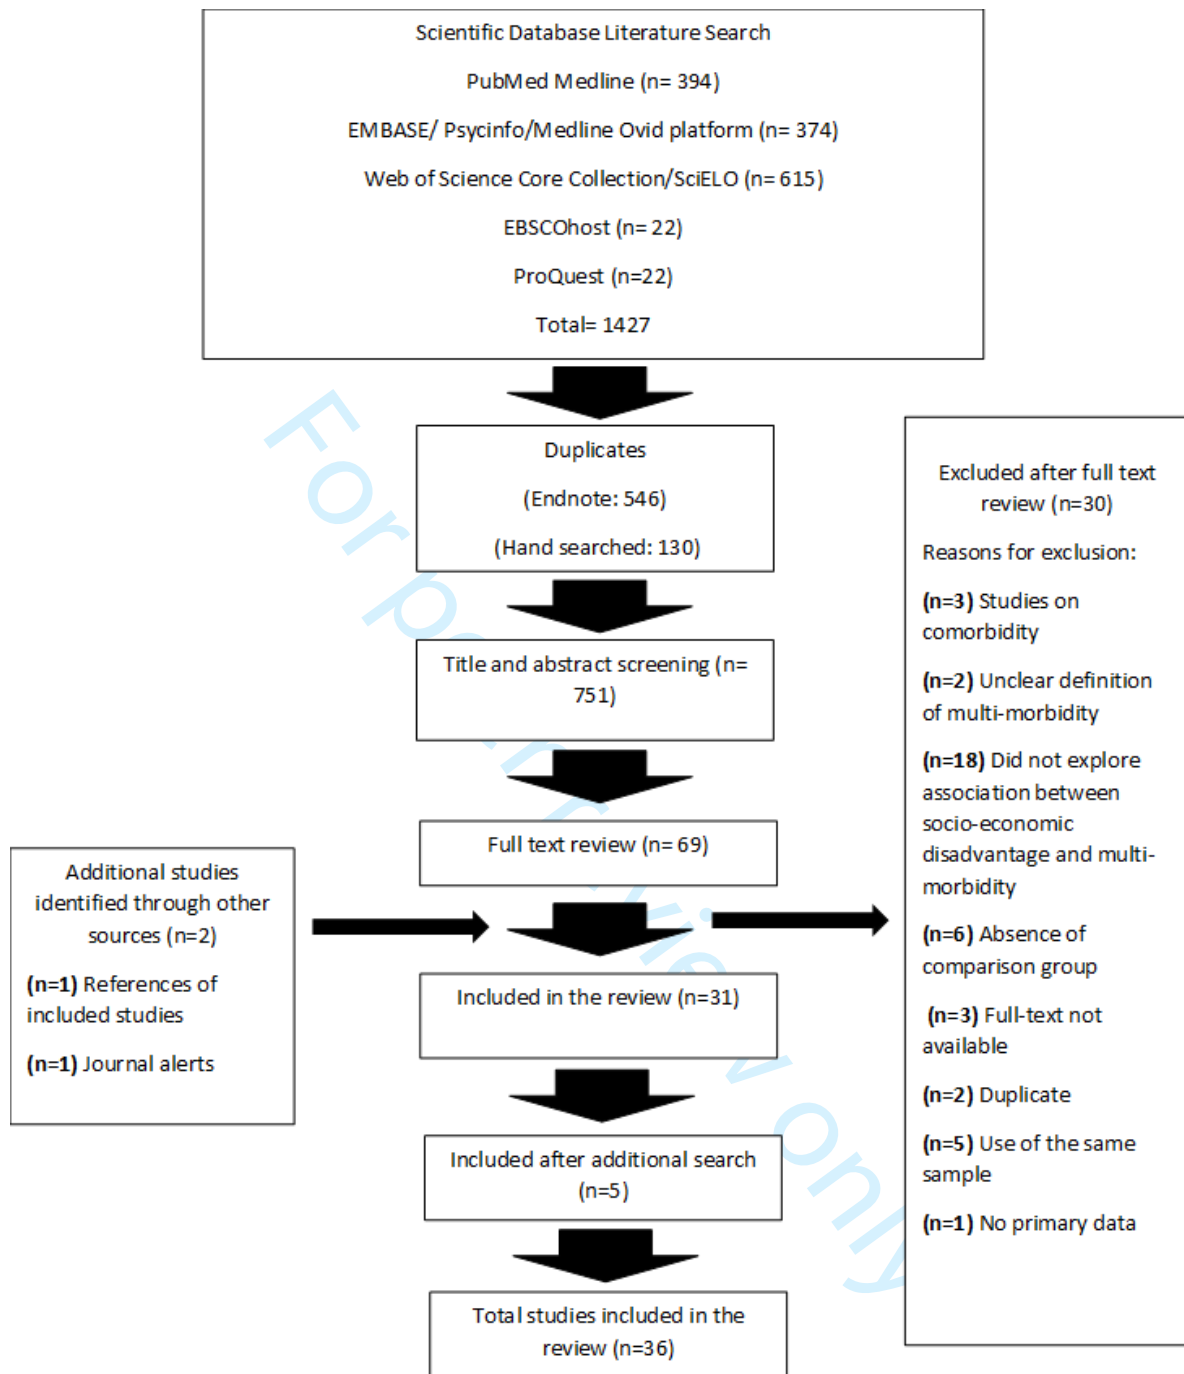



## Appendices

### Contents

|                                                                             |    |
|-----------------------------------------------------------------------------|----|
| Appendix 1. Detailed search strategy according to electronic databases..... | 2  |
| MEDLINE.....                                                                | 2  |
| WEB OF SCIENCE.....                                                         | 6  |
| PUBMED.....                                                                 | 8  |
| Appendix 2. Reasons for exclusion of studies after full-text review .....   | 11 |
| References.....                                                             | 12 |

For peer review only

## Appendix 1. Detailed search strategy according to electronic databases

### MEDLINE

| Outcome                                                                                                    | Exposure                                                                                                                                                                                                                                                                                                                                                                                                                                                                                                                                                      | Phenomenon                                                                                                                                                                                                                                                                                                                                                                                                                             |
|------------------------------------------------------------------------------------------------------------|---------------------------------------------------------------------------------------------------------------------------------------------------------------------------------------------------------------------------------------------------------------------------------------------------------------------------------------------------------------------------------------------------------------------------------------------------------------------------------------------------------------------------------------------------------------|----------------------------------------------------------------------------------------------------------------------------------------------------------------------------------------------------------------------------------------------------------------------------------------------------------------------------------------------------------------------------------------------------------------------------------------|
| (multimorb\$ or multi?morb\$<br>or<br>multiple chronic conditions\$ or<br>multiple chronic diseases\$).ti. | Psychosocial Deprivation* .ti. OR<br>OR<br>exp Family characteristics/ OR<br>exp Hierarchy, Social/ OR<br>Social Hierarch* .ti. OR<br>Minority Group* .ti. OR<br>exp Social Class/ OR<br>Social class* .ti. OR<br>Social Mobilit* .ti. OR<br>Caste* .ti. OR<br>Social Condition* .ti. OR<br>exp Sociology/ OR<br>Poverty .ti. OR<br>exp Socioeconomic Factors/ OR<br>Socioeconomic* .ti. OR<br>Salary .ti. OR<br>Salaries .ti. OR<br>Income* .ti. OR<br>Wage* .ti. OR<br>Remuneration* .ti. OR<br>Occupation* .ti. OR<br>Unemploy* .ti. OR<br>Labour* .ti. OR | Inequalit*.ab. OR<br>Unequal*.ab. OR<br>Disparit* .ab. OR<br>Inequit* .ab. OR<br>Difference* .ab. OR<br>Different*.ab. OR<br>Discriminat* .ab. OR<br>Marginali*.ab OR<br>Marginali*.ti OR<br>Depriv* .ab. OR<br>Inequalit*.ti. OR<br>Disparit* .ti. OR<br>Inequit* .ti. OR<br>Difference* .ti. OR<br>Discriminat* .ti. OR<br>Depriv* .ti. OR<br>Disadvantage*.ti. OR<br>Disadvantage*.ab.<br>OR<br>Vulnerab*.ab<br>OR<br>Vulnerab*.ti. |

1  
2  
3  
4  
5  
6  
7  
8  
9  
10  
11  
12  
13  
14  
15  
16  
17  
18  
19  
20  
21  
22  
23  
24  
25  
26  
27  
28  
29  
30  
31  
32  
33  
34  
35  
36  
37  
38  
39  
40  
41  
42  
43  
44  
45  
46  
47  
48  
49  
50  
51  
52  
53  
54  
55  
56  
57  
58  
59  
60

|  |                                                                                                                                                                                                                                                                                                                                                                                                                                                                                                                                                                                                                                                                                                                                    |  |
|--|------------------------------------------------------------------------------------------------------------------------------------------------------------------------------------------------------------------------------------------------------------------------------------------------------------------------------------------------------------------------------------------------------------------------------------------------------------------------------------------------------------------------------------------------------------------------------------------------------------------------------------------------------------------------------------------------------------------------------------|--|
|  | <p>Labor* .ti. OR</p> <p>Employment* .ti OR</p> <p>Employment* .ab OR</p> <p>Educational Status.ti. OR</p> <p>Educational Achievement*.ti.<br/>OR</p> <p>Educational level*.ti OR</p> <p>Educational level*.ab OR</p> <p>Educational attainment .ti OR</p> <p>Educational attainment .ab OR</p> <p>exp Ethnic Groups/ OR</p> <p>Ethnic* .ti. OR</p> <p>Race* .ti. OR</p> <p>Raci* .ti. OR</p> <p>exp Sexism/ OR</p> <p>Sexis* .ti. OR</p> <p>exp Gender Identity/ OR</p> <p>Gender* .ti. OR</p> <p>Social Capital* .ti. OR</p> <p>Neomaterial* .ti.<br/>OR</p> <p>Social Cohesi* .ti. OR</p> <p>Materalis* .ti. OR</p> <p>Psychosocial Deprivation* .ab.<br/>OR</p> <p>Social Hierarch* .ab. OR</p> <p>Minority Group* .ab. OR</p> |  |
|--|------------------------------------------------------------------------------------------------------------------------------------------------------------------------------------------------------------------------------------------------------------------------------------------------------------------------------------------------------------------------------------------------------------------------------------------------------------------------------------------------------------------------------------------------------------------------------------------------------------------------------------------------------------------------------------------------------------------------------------|--|

|    |  |                              |
|----|--|------------------------------|
| 1  |  |                              |
| 2  |  |                              |
| 3  |  | Social class* .ab. OR        |
| 4  |  |                              |
| 5  |  | Social Mobilit* .ab. OR      |
| 6  |  |                              |
| 7  |  | Caste* .ab. OR               |
| 8  |  |                              |
| 9  |  |                              |
| 10 |  | Social Condition* .ab. OR    |
| 11 |  |                              |
| 12 |  | Poverty .ab. OR              |
| 13 |  |                              |
| 14 |  | Socioeconomic*.ab. OR        |
| 15 |  |                              |
| 16 |  | Salary .ab. OR               |
| 17 |  |                              |
| 18 |  | Salaries .ab. OR             |
| 19 |  |                              |
| 20 |  | Income* .ab. OR              |
| 21 |  |                              |
| 22 |  | Wage* .ab. OR                |
| 23 |  |                              |
| 24 |  | Remuneration* .ab. OR        |
| 25 |  |                              |
| 26 |  | Occupation* .ab. OR          |
| 27 |  |                              |
| 28 |  | Unemploy* .ab. OR            |
| 29 |  |                              |
| 30 |  | Labour* .ab. OR              |
| 31 |  |                              |
| 32 |  | Labor* .ab. OR               |
| 33 |  |                              |
| 34 |  | Educational Status.ab. OR    |
| 35 |  |                              |
| 36 |  | Educational Achievement*.ab. |
| 37 |  | OR                           |
| 38 |  |                              |
| 39 |  | Ethnic* .ab. OR              |
| 40 |  |                              |
| 41 |  | Race* .ab. OR                |
| 42 |  |                              |
| 43 |  | Raci* .ab. OR                |
| 44 |  |                              |
| 45 |  | Sexis* .ab. OR               |
| 46 |  |                              |
| 47 |  | Gender* .ab. OR              |
| 48 |  |                              |
| 49 |  | Social Capital* .ab. OR      |
| 50 |  |                              |
| 51 |  | Neomaterial* .ab.            |
| 52 |  |                              |
| 53 |  | OR                           |
| 54 |  |                              |
| 55 |  | Social Cohesi* .ab. OR       |
| 56 |  |                              |
| 57 |  |                              |
| 58 |  |                              |
| 59 |  |                              |
| 60 |  |                              |

1  
2  
3  
4  
5  
6  
7  
8  
9  
10  
11  
12  
13  
14  
15  
16  
17  
18  
19  
20  
21  
22  
23  
24  
25  
26  
27  
28  
29  
30  
31  
32  
33  
34  
35  
36  
37  
38  
39  
40  
41  
42  
43  
44  
45  
46  
47  
48  
49  
50  
51  
52  
53  
54  
55  
56  
57  
58  
59  
60

|  |                                          |  |
|--|------------------------------------------|--|
|  | Materialis* .ab. OR<br>Neomaterial* .ab. |  |
|--|------------------------------------------|--|

For peer review only

## WEB OF SCIENCE

| Outcome                                                                                                         | Exposure                                                                                                                                                                                                                                                                                                                                                                                                                                                                                            | Phenomenon                                                                                                                                                                                 |
|-----------------------------------------------------------------------------------------------------------------|-----------------------------------------------------------------------------------------------------------------------------------------------------------------------------------------------------------------------------------------------------------------------------------------------------------------------------------------------------------------------------------------------------------------------------------------------------------------------------------------------------|--------------------------------------------------------------------------------------------------------------------------------------------------------------------------------------------|
| TS = (multimorb* OR<br>multi-morb* OR “multiple<br>chronic condition*” OR<br>“multiple chronic<br>disease*”)Med | TS = (“Psychosocial<br>Deprivation*” OR<br>“Family characteristics” OR<br>“Social Hierarch*” OR<br>“Minority Group*” OR<br>“Social Class” OR<br>“Social Mobilit*” OR<br>Caste* OR<br>“Social Condition*” OR<br>Sociology OR<br>Poverty. OR<br>“Socioeconomic Factors” OR<br>Socioeconomic* OR<br>Salary OR<br>Salaries OR<br>Income* OR<br>Wage* OR<br>Remuneration* OR<br>Occupation* OR<br>Unemploy* OR<br>Labour* OR<br>Labor* OR<br>Employment* OR<br>Employment* OR<br>“Educational Status” OR | TS = ( Inequalit* OR<br>Unequal* OR<br>Disparit* OR<br>Inequit* OR<br>Difference* OR<br>Different* OR<br>Discriminat* OR<br>Marginali* OR<br>Depriv* OR<br>Disadvantage* OR<br>Vulnerab* ) |

1  
2  
3  
4  
5  
6  
7  
8  
9  
10  
11  
12  
13  
14  
15  
16  
17  
18  
19  
20  
21  
22  
23  
24  
25  
26  
27  
28  
29  
30  
31  
32  
33  
34  
35  
36  
37  
38  
39  
40  
41  
42  
43  
44  
45  
46  
47  
48  
49  
50  
51  
52  
53  
54  
55  
56  
57  
58  
59  
60

|  |                                                                                                                                                                                                                                                                                                                                                                                                                        |  |
|--|------------------------------------------------------------------------------------------------------------------------------------------------------------------------------------------------------------------------------------------------------------------------------------------------------------------------------------------------------------------------------------------------------------------------|--|
|  | <p>“Educational Achievement*” OR</p> <p>“Educational level*” OR</p> <p>“Educational attainment” OR</p> <p>“Ethnic Groups” OR</p> <p>Ethnic* OR</p> <p>Race* OR</p> <p>Raci* OR</p> <p>Sexism OR</p> <p>Sexis* OR</p> <p>“Gender Identity” OR</p> <p>Gender* OR</p> <p>“Social Capital*” OR</p> <p>“Social Cohesi*” OR</p> <p>Materalis* OR</p> <p>Neomaterial*</p> <p>OR</p> <p>Materalis* OR</p> <p>Neomaterial*)</p> |  |
|--|------------------------------------------------------------------------------------------------------------------------------------------------------------------------------------------------------------------------------------------------------------------------------------------------------------------------------------------------------------------------------------------------------------------------|--|

## PUBMED

| Outcome                                                                                                                                                                                      | Exposure                                                                                                                                                                                                                                                                                                                                                                                                                                                                                                                                                                                                    | Phenomenon                                                                                                                                                                                                                                          |
|----------------------------------------------------------------------------------------------------------------------------------------------------------------------------------------------|-------------------------------------------------------------------------------------------------------------------------------------------------------------------------------------------------------------------------------------------------------------------------------------------------------------------------------------------------------------------------------------------------------------------------------------------------------------------------------------------------------------------------------------------------------------------------------------------------------------|-----------------------------------------------------------------------------------------------------------------------------------------------------------------------------------------------------------------------------------------------------|
| multimorb*[TIAB] OR<br>multimorbidity[MH] OR<br>multi-morb*[TIAB] OR<br>multiple chronic<br>condition*[TIAB] OR<br>multiple chronic<br>disease*[TIAB] OR<br>multiple chronic disease<br>[MH] | Psychosocial<br>Deprivation*[TIAB] OR<br>Family characteristics [TIAB]<br>OR<br>Social Hierarch*[TIAB] OR<br>Minority Group*[TIAB] OR<br>Social Class[TIAB] OR<br>Social Mobilit*[TIAB] OR<br>Caste*[TIAB] OR<br>Social Condition*[TIAB] OR<br>Sociology[TIAB] OR<br>Poverty [TIAB] OR<br>Socioeconomic Factors[TIAB]<br>OR<br>Socioeconomic*[TIAB] OR<br>Salary[TIAB] OR<br>Salaries[TIAB] OR<br>Income*[TIAB] OR<br>Wage*[TIAB] OR<br>Remuneration*[TIAB] OR<br>Occupation*[TIAB] OR<br>Unemploy*[TIAB] OR<br>Labour*[TIAB] OR<br>Labor*[TIAB] OR<br>Employment*[TIAB] OR<br>Educational Status [TIAB] OR | Inequalit*[TIAB] OR<br>Unequal*[TIAB] OR<br>Disparit*[TIAB] OR<br>Inequit*[TIAB] OR<br>Difference*[TIAB] OR<br>Different*[TIAB] OR<br>Discriminat*[TIAB] OR<br>Marginali*[TIAB] OR<br>Depriv*[TIAB] OR<br>Disadvantage*[TIAB] OR<br>Vulnerab*[TIAB] |



|    |  |                               |
|----|--|-------------------------------|
| 1  |  |                               |
| 2  |  |                               |
| 3  |  |                               |
| 4  |  | Educational                   |
| 5  |  | Achievement*[TIAB] OR         |
| 6  |  |                               |
| 7  |  | Educational level*[TIAB] OR   |
| 8  |  |                               |
| 9  |  | Educational attainment [TIAB] |
| 10 |  | OR                            |
| 11 |  |                               |
| 12 |  | Ethnic Groups[TIAB] OR        |
| 13 |  |                               |
| 14 |  | Ethnic*[TIAB] OR              |
| 15 |  |                               |
| 16 |  | Race*[TIAB] OR                |
| 17 |  |                               |
| 18 |  | Raci*[TIAB] OR                |
| 19 |  |                               |
| 20 |  | Sexism[TIAB] OR               |
| 21 |  |                               |
| 22 |  | Sexis*[TIAB] OR               |
| 23 |  |                               |
| 24 |  | “Gender Identity”[TIAB] OR    |
| 25 |  |                               |
| 26 |  | Gender*[TIAB] OR              |
| 27 |  |                               |
| 28 |  | Social Capital*[TIAB] OR      |
| 29 |  |                               |
| 30 |  | Social Cohesi*[TIAB] OR       |
| 31 |  |                               |
| 32 |  | Materialis*[TIAB] OR          |
| 33 |  |                               |
| 34 |  | Neomaterial*[TIAB]            |
| 35 |  |                               |
| 36 |  | OR                            |
| 37 |  |                               |
| 38 |  | Materialis*[TIAB] OR          |
| 39 |  |                               |
| 40 |  | Neomaterial*[TIAB]            |
| 41 |  |                               |
| 42 |  |                               |
| 43 |  |                               |
| 44 |  |                               |
| 45 |  |                               |
| 46 |  |                               |

**PROQUEST** (Applied Social Sciences/ERIC/Humanities Index/ProQuest Central/ProQuest dissertation and Thesis Global/Sociological Abstracts)

multimorb\* OR multi-morb\* OR “multiple chronic condition\*” OR “multiple chronic diseases\*”

AND

“Psychosocial Deprivation\*” OR “Family characteristics” OR “Social Hierarch\*” OR “Minority Group\*” OR “Social Class” OR “Social Mobilit\*” OR Caste\* OR “Social Condition\*” OR Sociology OR Poverty. OR “Socioeconomic Factors” OR Socioeconomic\* OR Salary OR Salaries OR Income\* OR Wage\* OR Remuneration\* OR Occupation\* OR

1  
2  
3 Unemploy\* OR Labour\* OR Labor\* OR Employment\* OR Employment\* OR “Educational  
4 Status” OR “Educational Achievement\*” OR “Educational level\*” OR “Educational  
5 attainment” OR “Ethnic Groups” OR Ethnic\* OR Race\* OR Raci\* OR Sexism OR Saxis\*  
6 OR “Gender Identity” OR Gender\* OR “Social Capital\*” OR “Social Cohesi\*” OR  
7 Materialis\* OR Neomaterial\* OR Materalis\* OR Neomaterial\*  
8  
9

10 AND  
11

12 Inequalit\* OR Unequal\* OR Disparit\* OR Inequit\* OR Difference\* OR Different\* OR  
13 Discriminat\* OR Marginali\* OR Depriv\* OR Disadvantage\* ORVulnerab\*  
14  
15  
16  
17  
18  
19  
20  
21  
22  
23  
24  
25  
26  
27  
28  
29  
30  
31  
32  
33  
34  
35  
36  
37  
38  
39  
40  
41  
42  
43  
44  
45  
46  
47  
48  
49  
50  
51  
52  
53  
54  
55  
56  
57  
58  
59  
60

## Appendix 2. Reasons for exclusion of studies after full-text review

**Comorbidity** Barnett, Mercer (1), Gallacher, McQueenie (2), Alonso-Moran, Orueta (3)

**Unclear definition of multimorbidity** Chau, Baumann (4), Reis-Santos, Gomes (5)

**Did not explore the association between socioeconomic disadvantage and multimorbidity** Charlton, Rudisill (6), Galenkamp, Gagliardi (7), Golinowska, Sowa (8), Jessen, Pallesen (9), Koroukian, Schiltz (10), Mujica-Mota, Roberts (11), Orueta, Garcia-Alvarez (12), Phaswana-Mafuya, Peltzer (13), Rodrigues, Gregorio (14), Thavorn, Maxwell (15), Tran, Kiran (16), van den Akker, Buntinx (17), Wang, Wang (18), Ward (19), Woo and Leung (20), Cassell, Edwards (21), Brinda, Attermann (22)

**Absence of comparative group** Eakin, Bull (23), Frakes, Brownie (24), Kangovi, Mitra (25), Leiser, Deruaz-Luyetl (26), Smith, Ferede (27), von dem Knesebeck, Bickel (28)

**Full-text unavailable** Jantz (29), Pati and Swain (30), Russel, Grant (31)

**Duplicate** Myung, Yo Han (32), Srinivasa Vittal, Skivington (33)

**Use of the same sample** Ahmadi, Alimohammadian (34), Ataguba (35), Kunna, Miguel San (36), Nunes, Thume (37), Habib, Mikati (38)

**No primary data** Shadmi (39)

## References

1. Barnett K, Mercer SW, Norbury M, Watt G, Wyke S, Guthrie B. Epidemiology of multimorbidity and implications for health care, research, and medical education: a cross-sectional study. *Lancet (London, England)*. 2012;380(9836):37-43.
2. Gallacher KI, McQueenie R, Nicholl B, Jani BD, Lee D, Mair FS. Risk factors and mortality associated with multimorbidity in people with stroke or transient ischaemic attack: a study of 8,751 UK Biobank participants. *Journal of comorbidity*. 2018;8(1):1-8.
3. Alonso-Moran E, Orueta JF, Fraile Esteban JI, Arteagoitia Axpe JM, Luz Marques Gonzalez M, Toro Polanco N, et al. Multimorbidity in people with type 2 diabetes in the Basque Country (Spain): Prevalence, comorbidity clusters and comparison with other chronic patients. *European Journal of Internal Medicine*. 2015;26(3):197-202.
4. Chau K, Baumann M, Chau N. Socioeconomic inequities patterns of multi-morbidity in early adolescence. *International journal for equity in health*. 2013;12:65.
5. Reis-Santos B, Gomes T, Macedo LR, Horta BL, Riley LW, Maciel EL. Prevalence and patterns of multimorbidity among tuberculosis patients in Brazil: a cross-sectional study. *International journal for equity in health*. 2013;12:61.
6. Charlton J, Rudisill C, Bhattarai N, Gulliford M. Impact of deprivation on occurrence, outcomes and health care costs of people with multiple morbidity. *Journal of Health Services Research & Policy*. 2013;18(4):215-23.
7. Galenkamp H, Gagliardi C, Principi A, Golinowska S, Moreira A, Schmidt AE, et al. Predictors of social leisure activities in older Europeans with and without multimorbidity. *European Journal of Ageing*. 2016;13(2):129-43.
8. Golinowska S, Sowa A, Deeg D, Socci M, Principi A, Rodrigues R, et al. Participation in formal learning activities of older Europeans in poor and good health. *Eur J Ageing*. 2016;13:115-27.
9. Jessen MAB, Pallesen AVJ, Kriegbaum M, Kristiansen M. The association between loneliness and health - a survey-based study among middle-aged and older adults in Denmark. *Ageing & mental health*. 2017:1-6.
10. Koroukian SM, Schiltz NK, Warner DF, Given CW, Schluchter M, Owusu C, et al. Social determinants, multimorbidity, and patterns of end-of-life care in older adults dying from cancer. *Journal of Geriatric Oncology*. 2017;8(2):117-24.
11. Mujica-Mota RE, Roberts M, Abel G, Elliott M, Lyrtzopoulos G, Roland M, et al. Common patterns of morbidity and multi-morbidity and their impact on health-related quality of life: evidence from a national survey. *Quality of life research : an international journal of quality of life aspects of treatment, care and rehabilitation*. 2015;24(4):909-18.
12. Orueta JF, Garcia-Alvarez A, Garcia-Goni M, Paolucci F, Nuno-Solinis R. Prevalence and costs of multimorbidity by deprivation levels in the basque country: a population based study using health administrative databases. *PLoS One*. 2014;9(2):e89787.
13. Phaswana-Mafuya N, Peltzer K, Chirinda W, Musekiwa A, Kose Z, Hoosain E, et al. Self-reported prevalence of chronic non-communicable diseases and associated factors among older adults in South Africa. *Glob Health Action*. 2013;6:20936.
14. Rodrigues AM, Gregorio MJ, Sousa RD, Dias SS, Santos MJ, Mendes JM, et al. Challenges of Ageing in Portugal: Data from the EpiDoC Cohort. *Acta medica portuguesa*. 2018;31(2):80-93.
15. Thavorn K, Maxwell CJ, Gruneir A, Bronskill SE, Bai Y, Kone Pefoyo AJ, et al. Effect of socio-demographic factors on the association between multimorbidity and healthcare costs: a population-based, retrospective cohort study. *BMJ open*. 2017;7(10):e017264.
16. Tran J, Kiran A, Rahimi K. Prevalence of multimorbidity of cardio-metabolic disease in the United Kingdom. *European Heart Journal*. 2016;37 (Supplement 1):742.

17. van den Akker M, Buntinx F, Metsemakers JF, Knottnerus J. Marginal impact of psychosocial factors on multimorbidity: Results of an explorative nested case-control study. *Social Science & Medicine*. 2000;50(11):1679-93.
18. Wang HH, Wang JJ, Lawson KD, Wong SY, Wong MC, Li FJ, et al. Relationships of multimorbidity and income with hospital admissions in 3 health care systems. *Annals of family medicine*. 2015;13(2):164-7.
19. Ward BW. Multiple chronic conditions and labor force outcomes: A population study of U.S. adults. *American journal of industrial medicine*. 2015;58(9):943-54.
20. Woo J, Leung J. Multi-morbidity, dependency, and frailty singly or in combination have different impact on health outcomes. *Age (Dordrecht, Netherlands)*. 2014;36(2):923-31.
21. Cassell A, Edwards D, Harshfield A, Rhodes K, Brimicombe J, Payne R, et al. The epidemiology of multimorbidity in primary care: A retrospective cohort study. *British Journal of General Practice*. 2018;68(669):e245-e51.
22. Brinda EM, Attermann J, Gerdtham UG, Enemark U. Socio-economic inequalities in health and health service use among older adults in India: results from the WHO Study on Global AGEing and adult health survey. *Public health*. 2016;141:32-41.
23. Eakin EG, Bull SS, Riley KM, Reeves MM, McLaughlin P, Gutierrez S. Resources for health: A primary-care-based diet and physical activity intervention targeting urban Latinos with multiple chronic conditions. *Health Psychology*. 2007;26(4):392-400.
24. Frakes KA, Brownie S, Davies L, Thomas J, Miller ME, Tyack Z. The sociodemographic and health-related characteristics of a regional population with chronic disease at an interprofessional student-assisted clinic in Queensland Capricornia Allied Health Partnership. *The Australian journal of rural health*. 2013;21(2):97-104.
25. Kangovi S, Mitra N, Grande D, Huo H, Smith RA, Long JA. Community Health Worker Support for Disadvantaged Patients With Multiple Chronic Diseases: A Randomized Clinical Trial. *American journal of public health*. 2017;107(10):1660-7.
26. Leiser S, Deruaz-Luyetl A, N'Goran AA, Pasquier J, Streit S, Neuner-Jehle S, et al. Determinants associated with deprivation in multimorbid patients in primary care-A cross-sectional study in Switzerland. *Plos One*. 2017;12(7).
27. Smith SM, Ferde A, O'Dowd T. Multimorbidity in younger deprived patients: an exploratory study of research and service implications in general practice. *BMC Fam Pract*. 2008;9:6.
28. von dem Knesebeck O, Bickel H, Fuchs A, Gensichen J, Hoefels S, Riedel-Heller SG, et al. Social inequalities in patient-reported outcomes among older multimorbid patients - results of the MultiCare cohort study. *International journal for equity in health*. 2015;14.
29. Jantz I. Multimorbidity at midlife: An analysis of morbidity patterns and life course socioeconomic cofactors. *Dissertation Abstracts International Section A: Humanities and Social Sciences*. 2017;78(5-A(E)):No Pagination Specified.
30. Pati S, Swain S. Prevalence, pattern and correlates of multimorbidity among primary care patients in India. *Tropical Medicine and International Health*. 2015;1(1):250.
31. Russel J, Grant C, Morton S. Cumulative socioeconomic disadvantage increases the risk of multi-morbidity in early childhood. *Journal of Paediatrics and Child Health*. 2017;53(S3):5.
32. Myung K, Yo Han L, Yong-Soo K, Shin J-Y, Lim J, Nazroo J. Socioeconomic inequalities in health in the context of multimorbidity: A Korean panel study. *PLoS One*. 2017;12(3).
33. Srinivasa Vittal K, Skivington K, Leyland AH, Hunt K, Mercer SW. The contribution of risk factors to socioeconomic inequalities in multimorbidity across the lifecourse: a longitudinal analysis of the Twenty-07 cohort. *BMC medicine*. 2017;15.

- 1  
2  
3 34. Ahmadi B, Alimohammadian M, Yaseri M, Majidi A, Boreiri M, Islami F, et al.  
4 Multimorbidity: Epidemiology and Risk Factors in the Golestan Cohort Study, Iran: A Cross-  
5 Sectional Analysis. *Medicine*. 2016;95(7):e2756.  
6  
7 35. Ataguba JE. Inequalities in multimorbidity in South Africa. *International journal for*  
8 *equity in health*. 2013;12:64.  
9  
10 36. Kunna R, Miguel San S, Jennifer Stewart W. Measurement and decomposition of  
11 socioeconomic inequality in single and multimorbidity in older adults in China and Ghana:  
12 results from the WHO study on global AGEing and adult health (SAGE). *International*  
13 *journal for equity in health*. 2017;16.  
14  
15 37. Nunes BP, Thume E, Facchini LA. Multimorbidity in older adults: magnitude and  
16 challenges for the Brazilian health system. *BMC Public Health*. 2015;15:1172.  
17  
18 38. Habib RR, Mikati D, Hojeij S, El Asmar K, Chaaya M, Zurayk R. Associations  
19 between poor living conditions and multi-morbidity among Syrian migrant agricultural  
20 workers in Lebanon. *European journal of public health*. 2016;26(6):1039-44.  
21  
22 39. Shadmi E. Disparities in multiple chronic conditions within populations. *Journal of*  
23 *comorbidity*. 2013;3(Spec Issue):45-50.  
24  
25  
26  
27  
28  
29  
30  
31  
32  
33  
34  
35  
36  
37  
38  
39  
40  
41  
42  
43  
44  
45  
46  
47  
48  
49  
50  
51  
52  
53  
54  
55  
56  
57  
58  
59  
60

## Preferred Reporting Items for Systematic reviews and Meta-Analyses extension for Scoping Reviews (PRISMA-ScR) Checklist

| SECTION                                               | ITEM | PRISMA-ScR CHECKLIST ITEM                                                                                                                                                                                                                                                                                  | REPORTED ON PAGE # |
|-------------------------------------------------------|------|------------------------------------------------------------------------------------------------------------------------------------------------------------------------------------------------------------------------------------------------------------------------------------------------------------|--------------------|
| <b>TITLE</b>                                          |      |                                                                                                                                                                                                                                                                                                            |                    |
| Title                                                 | 1    | Identify the report as a scoping review.                                                                                                                                                                                                                                                                   |                    |
| <b>ABSTRACT</b>                                       |      |                                                                                                                                                                                                                                                                                                            |                    |
| Structured summary                                    | 2    | Provide a structured summary that includes (as applicable): background, objectives, eligibility criteria, sources of evidence, charting methods, results, and conclusions that relate to the review questions and objectives.                                                                              |                    |
| <b>INTRODUCTION</b>                                   |      |                                                                                                                                                                                                                                                                                                            |                    |
| Rationale                                             | 3    | Describe the rationale for the review in the context of what is already known. Explain why the review questions/objectives lend themselves to a scoping review approach.                                                                                                                                   |                    |
| Objectives                                            | 4    | Provide an explicit statement of the questions and objectives being addressed with reference to their key elements (e.g., population or participants, concepts, and context) or other relevant key elements used to conceptualize the review questions and/or objectives.                                  |                    |
| <b>METHODS</b>                                        |      |                                                                                                                                                                                                                                                                                                            |                    |
| Protocol and registration                             | 5    | Indicate whether a review protocol exists; state if and where it can be accessed (e.g., a Web address); and if available, provide registration information, including the registration number.                                                                                                             |                    |
| Eligibility criteria                                  | 6    | Specify characteristics of the sources of evidence used as eligibility criteria (e.g., years considered, language, and publication status), and provide a rationale.                                                                                                                                       |                    |
| Information sources*                                  | 7    | Describe all information sources in the search (e.g., databases with dates of coverage and contact with authors to identify additional sources), as well as the date the most recent search was executed.                                                                                                  |                    |
| Search                                                | 8    | Present the full electronic search strategy for at least 1 database, including any limits used, such that it could be repeated.                                                                                                                                                                            |                    |
| Selection of sources of evidence†                     | 9    | State the process for selecting sources of evidence (i.e., screening and eligibility) included in the scoping review.                                                                                                                                                                                      |                    |
| Data charting process‡                                | 10   | Describe the methods of charting data from the included sources of evidence (e.g., calibrated forms or forms that have been tested by the team before their use, and whether data charting was done independently or in duplicate) and any processes for obtaining and confirming data from investigators. |                    |
| Data items                                            | 11   | List and define all variables for which data were sought and any assumptions and simplifications made.                                                                                                                                                                                                     |                    |
| Critical appraisal of individual sources of evidence§ | 12   | If done, provide a rationale for conducting a critical appraisal of included sources of evidence; describe the methods used and how this information was used in any data synthesis (if appropriate).                                                                                                      |                    |
| Synthesis of results                                  | 13   | Describe the methods of handling and summarizing the data that were charted.                                                                                                                                                                                                                               |                    |

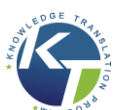



| SECTION                                       | ITEM | PRISMA-ScR CHECKLIST ITEM                                                                                                                                                                       | REPORTED ON PAGE # |
|-----------------------------------------------|------|-------------------------------------------------------------------------------------------------------------------------------------------------------------------------------------------------|--------------------|
| <b>RESULTS</b>                                |      |                                                                                                                                                                                                 |                    |
| Selection of sources of evidence              | 14   | Give numbers of sources of evidence screened, assessed for eligibility, and included in the review, with reasons for exclusions at each stage, ideally using a flow diagram.                    |                    |
| Characteristics of sources of evidence        | 15   | For each source of evidence, present characteristics for which data were charted and provide the citations.                                                                                     |                    |
| Critical appraisal within sources of evidence | 16   | If done, present data on critical appraisal of included sources of evidence (see item 12).                                                                                                      |                    |
| Results of individual sources of evidence     | 17   | For each included source of evidence, present the relevant data that were charted that relate to the review questions and objectives.                                                           |                    |
| Synthesis of results                          | 18   | Summarize and/or present the charting results as they relate to the review questions and objectives.                                                                                            |                    |
| <b>DISCUSSION</b>                             |      |                                                                                                                                                                                                 |                    |
| Summary of evidence                           | 19   | Summarize the main results (including an overview of concepts, themes, and types of evidence available), link to the review questions and objectives, and consider the relevance to key groups. |                    |
| Limitations                                   | 20   | Discuss the limitations of the scoping review process.                                                                                                                                          |                    |
| Conclusions                                   | 21   | Provide a general interpretation of the results with respect to the review questions and objectives, as well as potential implications and/or next steps.                                       |                    |
| <b>FUNDING</b>                                |      |                                                                                                                                                                                                 |                    |
| Funding                                       | 22   | Describe sources of funding for the included sources of evidence, as well as sources of funding for the scoping review. Describe the role of the funders of the scoping review.                 |                    |

JBI = Joanna Briggs Institute; PRISMA-ScR = Preferred Reporting Items for Systematic reviews and Meta-Analyses extension for Scoping Reviews.

\* Where *sources of evidence* (see second footnote) are compiled from, such as bibliographic databases, social media platforms, and Web sites.

† A more inclusive/heterogeneous term used to account for the different types of evidence or data sources (e.g., quantitative and/or qualitative research, expert opinion, and policy documents) that may be eligible in a scoping review as opposed to only studies. This is not to be confused with *information sources* (see first footnote).

‡ The frameworks by Arksey and O'Malley (6) and Levac and colleagues (7) and the JBI guidance (4, 5) refer to the process of data extraction in a scoping review as data charting.

§ The process of systematically examining research evidence to assess its validity, results, and relevance before using it to inform a decision. This term is used for items 12 and 19 instead of "risk of bias" (which is more applicable to systematic reviews of interventions) to include and acknowledge the various sources of evidence that may be used in a scoping review (e.g., quantitative and/or qualitative research, expert opinion, and policy document).

From: Tricco AC, Lillie E, Zarin W, O'Brien KK, Colquhoun H, Levac D, et al. PRISMA Extension for Scoping Reviews (PRISMA-ScR): Checklist and Explanation. *Ann Intern Med.* 2018;169:467–473. doi: [10.7326/M18-0850](https://doi.org/10.7326/M18-0850).

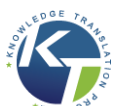



# BMJ Open

## Theoretical explanations for socioeconomic inequalities in multimorbidity – A Scoping Review

|                                 |                                                                                                                                                                                                                                                                                                                                                                                                                                                                                                                                                                                                                                                                                                                          |
|---------------------------------|--------------------------------------------------------------------------------------------------------------------------------------------------------------------------------------------------------------------------------------------------------------------------------------------------------------------------------------------------------------------------------------------------------------------------------------------------------------------------------------------------------------------------------------------------------------------------------------------------------------------------------------------------------------------------------------------------------------------------|
| Journal:                        | <i>BMJ Open</i>                                                                                                                                                                                                                                                                                                                                                                                                                                                                                                                                                                                                                                                                                                          |
| Manuscript ID                   | bmjopen-2021-055264.R1                                                                                                                                                                                                                                                                                                                                                                                                                                                                                                                                                                                                                                                                                                   |
| Article Type:                   | Original research                                                                                                                                                                                                                                                                                                                                                                                                                                                                                                                                                                                                                                                                                                        |
| Date Submitted by the Author:   | 25-Nov-2021                                                                                                                                                                                                                                                                                                                                                                                                                                                                                                                                                                                                                                                                                                              |
| Complete List of Authors:       | Fleitas Alfonzo, Ludmila; The University of Melbourne School of Population and Global Health, Centre for Health Equity<br>King, Tania ; The University of Melbourne School of Population and Global Health, Centre for Health Equity<br>You, Emily; The University of Melbourne Faculty of Medicine Dentistry and Health Sciences, Academic Unit for Psychiatry of Old Age, Department of Psychiatry<br>Contreras-Suarez, Diana; University of Melbourne, Melbourne Institute: Applied Economic & Social Research<br>Zulkelfi, Syafiqah; The University of Melbourne School of Population and Global Health, Centre for Health Equity<br>Singh, Ankur; University of Melbourne, Centre of Epidemiology and Biostatistics |
| <b>Primary Subject Heading</b>: | Epidemiology                                                                                                                                                                                                                                                                                                                                                                                                                                                                                                                                                                                                                                                                                                             |
| Secondary Subject Heading:      | Public health                                                                                                                                                                                                                                                                                                                                                                                                                                                                                                                                                                                                                                                                                                            |
| Keywords:                       | EPIDEMIOLOGY, PUBLIC HEALTH, SOCIAL MEDICINE                                                                                                                                                                                                                                                                                                                                                                                                                                                                                                                                                                                                                                                                             |
|                                 |                                                                                                                                                                                                                                                                                                                                                                                                                                                                                                                                                                                                                                                                                                                          |

SCHOLARONE™  
Manuscripts

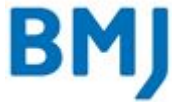

I, the Submitting Author has the right to grant and does grant on behalf of all authors of the Work (as defined in the below author licence), an exclusive licence and/or a non-exclusive licence for contributions from authors who are: i) UK Crown employees; ii) where BMJ has agreed a CC-BY licence shall apply, and/or iii) in accordance with the terms applicable for US Federal Government officers or employees acting as part of their official duties; on a worldwide, perpetual, irrevocable, royalty-free basis to BMJ Publishing Group Ltd ("BMJ") its licensees and where the relevant Journal is co-owned by BMJ to the co-owners of the Journal, to publish the Work in this journal and any other BMJ products and to exploit all rights, as set out in our [licence](#).

The Submitting Author accepts and understands that any supply made under these terms is made by BMJ to the Submitting Author unless you are acting as an employee on behalf of your employer or a postgraduate student of an affiliated institution which is paying any applicable article publishing charge ("APC") for Open Access articles. Where the Submitting Author wishes to make the Work available on an Open Access basis (and intends to pay the relevant APC), the terms of reuse of such Open Access shall be governed by a Creative Commons licence – details of these licences and which [Creative Commons](#) licence will apply to this Work are set out in our licence referred to above.

Other than as permitted in any relevant BMJ Author's Self Archiving Policies, I confirm this Work has not been accepted for publication elsewhere, is not being considered for publication elsewhere and does not duplicate material already published. I confirm all authors consent to publication of this Work and authorise the granting of this licence.

**Theoretical explanations for socioeconomic inequalities in multimorbidity – A Scoping Review**

Ludmila Fleitas Alfonzo<sup>a</sup>, MPH, Tania King<sup>a</sup>, PhD, Emily You<sup>b</sup>, PhD, Diana Contreras Suárez<sup>c</sup>, PhD, Syafiqah Zulkelfi<sup>a</sup>, MSc, Ankur Singh<sup>d</sup>, PhD

- a. Centre for Health Equity, Melbourne School of Population & Global Health. The University of Melbourne. 207 Bouverie Street, Melbourne. Victoria 3004, Australia
  - b. Academic Unit for Psychiatry of Old Age, Department of Psychiatry, Medical School, University of Melbourne. Ground Floor, Building 5, 34-54 Poplar Road, Parkville VIC 3052, Australia
  - c. Melbourne Institute: Applied Economic & Social Research, University of Melbourne. 111 Barry Street, Melbourne. Victoria 3010, Australia
  - d. Centre of Epidemiology and Biostatistics, Melbourne School of Population & Global Health. The University of Melbourne. 207 Bouverie Street, Melbourne. Victoria 3004, Australia
- 

**Corresponding Author:**

Ludmila Fleitas Alfonzo  
Disability and health unit | Centre for Health Equity  
Melbourne School Population and Global Health  
Level 4, 207, Bouverie Street  
The University of Melbourne, Victoria 3010 Australia  
E: ludmila.fleitasalfonzo@unimelb.edu.au

**Wordcount**

Abstract: 235 words. Main text: 2361 words

**Figures and tables:** 1 figure and 3 tables.

## ABSTRACT

**Objective:** To document socio-epidemiologic theories used to explain the relationship between socioeconomic disadvantage and multimorbidity.

**Design:** Scoping review

**Methods:** A search strategy was developed and then applied to multiple electronic databases including Medline, EMBASE, PsychInfo, Web of Science, Scielo, Applied Social Sciences, ERIC, Humanities Index and Sociological Abstracts. After the selection of studies, data was extracted using a data charting plan. The last search was performed on 28/09/2021. Extracted data included: study design, country, population sub-groups, measures of socioeconomic inequality, assessment of multimorbidity and conclusion on the association between socioeconomic variables and multimorbidity. Included studies were further assessed on their use of theory, type of theories used and context of application. Finally, we conducted a meta-narrative synthesis to summarise the results.

**Results:** A total of 64 studies were included in the review. Of these, 33 papers included theories as explanations for the association between socioeconomic position and multimorbidity. Within this group, sixteen explicitly stated those theories and five tested at least one theory. Behavioural theories (health behaviours) were the most frequently used, followed by materialist (access to health resources) and psychosocial (stress pathways) theories. Most studies used theories as post hoc explanations for their findings or for study rationale. Supportive evidence was found for the role of material, behavioural and life course theories in explaining the relationship between social inequalities and multi-morbidities.

**Conclusion:** Given the widely reported social inequalities in multimorbidity and its increasing public health burden there is a critical gap in evidence on pathways from socioeconomic disadvantage to multimorbidity. Generating evidence of these pathways will guide the development of intervention and public policies to prevent multimorbidity among people living in social disadvantage. Material, behavioural and life course pathways can be targeted to reduce the negative effect of low socioeconomic position on multi-morbidities.

**Keywords:** multimorbidity, socioeconomic inequalities, scoping review, theoretical explanations, epidemiology

### Strengths and limitations:

- This is the first scoping review exploring the use of theories to explain the association between socioeconomic position and multiple chronic conditions.
- We identified numerous gaps in the literature that future research should address to inform intervention design and public policies aiming at reducing socioeconomic inequalities in multimorbidity.
- We used a robust methodology, including a comprehensive search strategy, already piloted and verified with previous research.
- Articles that were not in English were excluded from our review. This could have obstructed the inclusion of papers from developing countries, therefore limiting the generalisability of our findings.

## INTRODUCTION

Multimorbidity is a societal challenge and an increasingly recognised public health concern (1-3). It is described as the co-occurrence of two or more chronic conditions in an individual (4). Negative consequences of multimorbidity include: reduced quality of life; functional decline; increased healthcare utilisation; polypharmacy; high treatment burdens; psychological distress; and increased risk of premature death (5). There is an emerging threat of increased multimorbidity worldwide, primarily due to population aging and the epidemiological transition from communicable to non-communicable diseases (6). The COVID-19 pandemic has put a spotlight on multimorbidity as people with existing chronic conditions have suffered a higher risk of its infection, as well as more severe consequences of SARS-CoV-2 infection (7). Furthermore, abundant empirical evidence shows socioeconomic inequalities in multimorbidity across countries at different levels of economic development (8-12).

A meta-analysis of 24 cross-sectional studies reported that low education compared to high education was associated with 64% higher odds of multimorbidity (13). Another systematic review with 41 studies from North America, Europe and Australasia reported that people with the lowest level of income had 4.4 times higher odds of multimorbidity than those with the highest level of income, while those in most deprived areas had 1.42 times higher odds of multimorbidity than those in the least deprived areas (14). A clear causal relationship between socioeconomic conditions and multimorbidity has also been argued based on empirical evidence (10), however, pathways through which socioeconomic disadvantage leads to multimorbidity are not well studied (4).

Theories are used in epidemiology to understand the relationships between exposure to, for example, socioeconomic disadvantage and non-communicable diseases. This is mainly because, as opposed to conceptual frameworks, specific theoretical pathways can be tested using empirical data. Theories provide insight into the mechanisms through which an exposure (e.g. socioeconomic position) leads to a health outcome (15), and as such, they are particularly helpful in informing intervention designs. Since the release of the Black Report in 1982 (16), several categories of theories have been proposed to explain associations between social inequalities and health outcomes (16, 17); albeit in the context of single diseases or health measure. These include:

- 1  
2  
3  
4  
5  
6  
7  
8  
9  
10  
11  
12  
13  
14  
15  
16  
17  
18  
19  
20  
21  
22  
23  
24  
25  
26  
27  
28  
29  
30  
31  
32  
33  
34  
35  
36  
37  
38  
39  
40  
41  
42  
43  
44  
45  
46  
47  
48  
49  
50  
51  
52  
53  
54  
55  
56  
57  
58  
59  
60
- I. Behavioural: The behavioural explanation posits that people from different backgrounds behave differently and make health-related choices that are commonly based on their socioeconomic background. As people experience socioeconomic deprivation, they also encounter more barriers to adopting healthy lifestyles. For instance, individual health damaging and promoting behaviours are differentially distributed across the social scale, with more disadvantaged groups more likely to engage in health damaging behaviours such as smoking, and advantaged groups more likely to engage in health promoting behaviours such as physical activity (18). As a result, poor health outcomes are commonly clustered at the lower end of the socioeconomic scale (17). Behavioural theory can be extended to apply to multimorbidity from a common risk factor approach, as a behavioural risk factor can cause multiple diseases (for example, smoking can cause cancer, asthma, cardiovascular diseases (19, 20)).
  - II. Psychosocial: this theory postulates that the emotions that arise due to social inequality can directly affect biological health (17). This can be caused in two ways, either through the practice of health compromising behaviours or through biological changes due to the individual being in a sustained state of stress (17). Hence, the behavioural explanation can be a descendent of psychosocial processes under this explanation. The perceived lack of control and psychosocial stress may lead to adverse health behaviours and may activate neuro-endocrine mechanisms, and in doing so, may affect multiple body systems and lead to multimorbidity.
  - III. Materialist: the material environment has a significant impact on the health of an individual. Exposure to health-risk or health-protective factors varies according to socioeconomic position due to differential access to material resources; differences are more evident in non-egalitarian societies. For instance, individuals living in socioeconomic disadvantage are less likely to be able to access information and resources necessary to maintain good health compared to their more advantaged counterparts (17). Socioeconomically deprived individuals are also more likely to be exposed to hazardous working environments (17). The materialist theory proposes these explanations as pathways between socioeconomic deprivation and health inequalities (17). Lack of material resources such as inadequate housing for example, can lead to multimorbidity by causing depression as well as respiratory illnesses such as asthma.

- 1  
2  
3  
4  
5  
6  
7  
8  
9  
10  
11  
12  
13  
14  
15  
16  
17  
18  
19  
20  
21  
22  
23  
24  
25  
26  
27  
28  
29  
30  
31  
32  
33  
34  
35  
36  
37  
38  
39  
40  
41  
42  
43  
44  
45  
46  
47  
48  
49  
50  
51  
52  
53  
54  
55  
56  
57  
58  
59  
60
- IV. Social support: this theory holds that positive social support mitigates the detrimental effect of socioeconomic deprivation in health (21, 22). Accordingly, strong social networks and good social relationships are linked to good health and conversely, poor social relations and weak social support networks are deleterious to health. Social support is considered to be a distal determinant of health that may influence health through multiple mechanisms, for example by reducing stress and providing access to local resources, and in doing so, may prevent both mental and physical multimorbidities.
- V. Social capital: While variously defined, social capital is broadly described as the functioning of social groups through a shared sense of identity, trust, cooperation, reciprocity and shared understandings, norms, and values (23). Social capital emphasises that a more unequal distribution in income undermines trust and damages social relationships at a population level. This theory attempts to explain why egalitarian societies tend to be healthier than non-egalitarian societies (24, 25). Similar to social support, high social capital is likely to boost health and prevent multiple chronic conditions by reducing stressors and increasing access to shared resources.

In addition to the abovementioned theories, a life course framework examines the effect of early life socioeconomic exposures on later health outcomes (26). Two models are proposed to explain the life course framework: the accumulation model and the critical periods model. The accumulation model emphasises the cumulative effect of exposure to socioeconomic disadvantage across different stages in life on subsequent increased risk of poor health outcomes. The critical periods model focuses on the effect of exposure to factors influencing health during critical periods of development (27). Finally, a neo-liberal framework for health inequalities emphasises the role of political arrangements in leading to socioeconomic inequalities, and in turn health inequalities.

We aim to review the socio-epidemiologic theories applied to explain the relationship between socioeconomic disadvantage and multimorbidity in the population. Where possible, we examined whether theories applied were tested using robust analytical methods such as mediation analysis.



## METHODS

We conducted a scoping review to examine epidemiologic theories applied to explain the association between socioeconomic disadvantage and multimorbidity (28, 29), and to map the information available in the current literature. Because the primary purpose of this study was to identify and categorise the theories being used in the existing literature, a scoping review was preferred over a systematic review. We followed the steps of a scoping review as per previously defined guidelines (28, 29).

### Stage I: Identifying the Research Question

Our review question was: “How are the socio-epidemiologic theories applied to explain the relationship between socioeconomic disadvantage and multimorbidity?”

### Stage II: Identifying Relevant Studies

We identified search terms and keywords relevant to socioeconomic disadvantage, theoretical pathways and multimorbidity from published systematic reviews (13, 30) and tailored them to answer our research question. First, a detailed search strategy was developed using keywords and hierarchically defined subject headings. Once the search terms were agreed upon, they were adapted for multiple electronic databases including Medline, EMBASE, PsychInfo (Ovid platform), Web of Science, Scielo, Applied Social Sciences, ERIC, Humanities Index and Sociological Abstracts (see *Appendix 1*). The reference lists of all selected articles were screened to identify any additional studies. Search alerts were set up to notify the research team of articles published after 25<sup>th</sup> of May 2018 when literature search was implemented. This search was updated on 11 December 2019 and then on 28 September 2021.

### Stage III: Study Selection

We applied a strict inclusion and exclusion criteria; these are displayed in Table 1.

Socioeconomic condition or status indicates the position in which an individual or a group is located within the social structure. It can be measured using educational attainment, income, occupation, wealth and area level measures (deprivation, socio-economic scores). We use the term socioeconomic inequalities in health to indicate the differences in rates of disease between individuals living in different socioeconomic conditions. Socioeconomic disadvantage refers to those who have the lowest socioeconomic conditions. For inclusion in this review, socioeconomic position could be measured using the following indicators:



1  
2  
3 occupation, income (household or individual), educational attainment, area level  
4 socioeconomic deprivation, wealth, and social class (17, 31).

5  
6  
7 We excluded studies on “comorbidity” as such studies are focussed on an index condition  
8 (e.g. diabetes) (32). The terms multimorbidity and comorbidity are often used  
9 interchangeably as both describe the presence of multiple chronic conditions. However,  
10 comorbidity is a disease-centred term that describes the presence of additional conditions  
11 associated with an index disease (4). The focus of this review is multimorbidity only. Studies  
12 on institutionalised individuals, qualitative research, and those written in a language other  
13 than English were excluded. A detailed list of inclusion and exclusion criteria can be found in  
14 *Table 1*. Abstracts and full-text articles were reviewed for inclusion by LFA using the citation  
15 manager EndNote. A second reviewer (AS) cross-checked 10% of these articles.  
16  
17  
18  
19  
20  
21  
22

23  
24 *See Table 1*

#### 25 26 **Stage IV: Charting the Data**

27  
28 A data charting form was created which included study details (study design, country,  
29 population sub-groups, measures of socioeconomic inequality, assessment of multimorbidity  
30 and conclusion on the association between socioeconomic variables and multimorbidity), use  
31 of theory, type of theories and context of application. Use of theory was categorised as  
32 inferred by us (reviewers/readers) or explicitly mentioned by the original study authors. It is  
33 important to distinguish between the two because the former relies on the reviewers/readers’  
34 subjective judgement (which may not be accurate) while the latter accurately reflects the  
35 theoretical reasoning of the original authors. Data charting was performed by LFA and 10%  
36 of the studies were cross checked by AS.  
37  
38  
39  
40  
41  
42  
43

44  
45 Each study was examined for the type of theory (example: psychosocial or material), extent  
46 of use (whether used in a post hoc manner or integrated within an analysis) and their context  
47 of use (background, methods or discussion section of retrieved paper(s)). We recorded  
48 whether theories that were directly mentioned or inferred were consistent with any of the  
49 existing socio-epidemiologic theories. When directly mentioned, types of theories were  
50 recorded verbatim. This follows the approach previously applied in a published study  
51 examining the application of socio-epidemiologic theories in studies on the relationship  
52 between social inequality and oral health (30).  
53  
54  
55  
56  
57  
58  
59  
60

## Stage V: Collating, Summarizing and Reporting the Results

We carried out a narrative synthesis to summarise the results from the retrieved data. Because the objective of this review is to offer a snapshot of the available evidence of theories explaining socioeconomic inequalities in multimorbidity and not on assessing the effect of socioeconomic disadvantage on multimorbidity development, we did not assess the quality of included papers in accordance with the guidelines for conducting scoping reviews (28).

### Patient and public involvement

No patient involved

## RESULTS

Our search led to the identification of 751 unique papers that underwent title and abstract screening. Sixty-nine papers were deemed eligible for full-text review. Two additional studies were included for full-text review from additional sources. After the full-text review and, thirty-six studies proceeded to data charting stage. In the updated search on 28 September 2021 an additional 573 new records were identified of which 461 titles and abstracts were screened. After full text screening of 44 studies 2827 new studies were included in the review increasing the total of included studies to 64. A flowchart of this process is shown in Figure 1.

Figure 1 Flow chart of the study selection process (*2-column fitting image*)  
(*see figure 1*)

### Summary characteristics of included studies

Twenty studies were from low- and middle-income countries (12, 33-51) and the remaining 45 studies were from high income countries. The majority of articles were conducted among adults and only three study included children (52-54). More than half (n=38/64) were cross-sectional and 26/64 used longitudinal data (9, 10, 41, 53, 55-75)(Table 2).

Educational attainment was the preferred measure of socioeconomic position (n=38/64) and 38 studies used multiple measures of socioeconomic position as exposures. The majority of studies (n=51/64) simply documented the presence of multimorbidity and approximately one third (n=13/64) additionally examined different patterns of multimorbidity (9, 39, 40, 44, 46, 52, 54, 66-69, 71, 74, 76, 77)(Table 2).

*See Table 2*

### Types of theories

Overall, nearly half of studies (33/64) referred to at least one socio-epidemiological theory. Therefore, 31 studies can be considered largely atheoretical, without any emphasis on pathways through which socioeconomic disadvantage leads to multimorbidity. In the thirty three studies applying a theory, the following theories were referred to: behavioural (10, 33, 34, 36, 37, 39-41, 45, 50-52, 58, 70, 71, 78-81) materialist (37, 40, 41, 44, 45, 47, 49, 51, 70, 71, 73, 78, 81-84) and psychosocial (33, 41, 50, 51, 56, 71, 72, 81, 83-85). In addition, four studies applied a theoretical construct called 'sense of coherence', which indicates an individual's coping capacity to deal with life and stressful events (86), and is an indicator of self-efficacy and psychosocial well-being (consistent with psychosocial explanations) (72), and also encompasses social capital (50), and social support (56) which are widely considered as psychosocial assets (Table 3). Five studies used a life-course framework (10, 54, 62, 63, 73). Collectively, behavioural theory was the most referred to among studies.

### Context of application of theories

Of the papers using theories, fifteen explicitly stated those theories (10, 34, 37, 40, 56, 62, 63, 71-73, 79, 81, 83-85), and the other 21 studies were inferred to be consistent with a presumed theoretical pathway, based on definitions from existing literature.

*See Table 3*

### Testing the explanatory potential of theories

Only five studies (10, 37, 62, 71, 79) tested variables consistent with theoretical pathways as mediators between socioeconomic disadvantage and multimorbidity. Applying material theory, Chung et al. (37), examined perceptions of financial hardship, an indicator of economic deprivation, as a mediator between housing tenure and multimorbidity. They found a small mediation effect, indicating that increased financial burden puts private housing residents at a higher risk of suffering multiple conditions when compared with public housing residents (37).

Drawing on behavioural theory as well as a life course framework, Katikireddi et al. (10), quantified mediation by five behavioural risk factors (diet, smoking, physical activity, alcohol and BMI) acting on the association between two socioeconomic measures (area-based deprivation and household income) and multimorbidity over the life course. Their analyses showed that behavioural factors partially mediated the inverse association between area level deprivation and multimorbidity.

1  
2  
3 The life course framework was applied by Johnston et al. (62) in their examination of  
4 educational attainment during adulthood as a mediator of the association between father's  
5 occupational social class at birth and multimorbidity. Their analyses showed a partial  
6 mediational effect of educational attainment on the association between childhood  
7 socioeconomic position and multimorbidity.  
8  
9

10  
11  
12 Mondor et al. (79) also drew on behavioural theory in their study that quantified the  
13 mediation effect of lifestyle factors (physical activity, smoking and BMI) on the association  
14 between income inequalities and multimorbidity. Lifestyle factors only explained a small  
15 proportion of observed income-related inequalities in multimorbidity.  
16  
17  
18

19  
20 Finally, Singh et al. (71) examined social support as a mediator between financial hardship  
21 and multimorbidity among Australian adults and found that 30% of the total effect of  
22 financial hardship on multimorbidity was transmitted through social support.  
23  
24  
25

## 26 **DISCUSSION**

### 27 **Summary of findings**

28  
29 Overall, we found limited use of theories to explain the relationship between socioeconomic  
30 position and multimorbidity. When used, theories were seldom explicitly mentioned or tested.  
31  
32 Among all the potential explanations, behavioural theories were the most frequently used,  
33 followed by materialist and then psychosocial theories.  
34  
35  
36

37  
38 Only five studies tested the explanatory potential of theories and their mediation effect on the  
39 association between socioeconomic position and multimorbidity. Although we identified the  
40 use of seven different theories, materialist, behavioural, psychosocial and life course theories  
41 were the only ones tested. Existing evidence partially support these theories (10, 37, 62, 71,  
42 79), however their use was mostly limited to post-hoc explanations of findings in the overall  
43 literature.  
44  
45  
46  
47

48  
49 Our findings are consistent with the two major evidence gaps highlighted in the report  
50 'Multimorbidity: a priority for global health research'(4). First, evidence of the relationship  
51 between socioeconomic disadvantage and multimorbidity is largely cross-sectional. This is a  
52 limitation of the existing evidence, as temporal ordering between exposure (social  
53 disadvantage) and outcome (multimorbidity), a key undisputed criterion of causality (87), is  
54 difficult to establish cross-sectionally. Second, there is a paucity of evidence regarding  
55 pathways (e.g. behavioural, material, psychosocial) between the shared causal factor  
56  
57  
58  
59  
60

(exposure to socioeconomic disadvantage) and multiple conditions that co-occur in multimorbidity (4). The lack of evidence precludes policy makers from intervening on causal mechanisms that can prevent, or mitigate observed socioeconomic inequalities in multimorbidity (88). Among those studies testing theories, there was a predominance of the application of the behavioural theory. However, the use of contemporary approaches to causal inference, using a counterfactual framework to maximise exchangeability between exposed and unexposed participants, was limited (71, 88). Therefore, we cannot rule out bias arising from mediator-outcome confounding, time varying confounding or the presence exposure-outcome interaction. Approaches need to shift towards a more comprehensive examination of pathways to allow policymakers to select interventions with maximum capacity to reduce inequalities. It is also worth noting that given the variations in the relationship of interest by country level of income and age group, future studies should examine the relevance of theories across different contexts and ages.

### **Strengths and limitations**

Our study has some strengths and limitations. To our knowledge, this is the first scoping review that explores the use of theories to explain the association between socioeconomic position and multimorbidity in the current literature. We identified numerous gaps in the literature that need to be addressed to improve our understanding of the socioeconomic inequalities in multimorbidity. Our search strategy drew on a wide range of electronic databases, and we used a robust methodology, already piloted and verified in previous work (30). A key limitation is that articles not in English were excluded in our review. Moreover, we did not use any tool to assess the quality of the included studies. This information is already provided by existing reviews (13, 14). Lastly, we restricted this review to articles assessing only multimorbidity and excluded those looking at comorbidities. We acknowledge that some authors use both terms interchangeably, therefore papers using the term comorbidity to indicate the presence of multiple independent chronic conditions may be missing from this review.

### **CONCLUSION**

Our understanding of the pathways between socioeconomic inequalities and multimorbidity is limited and mostly unexplained. Studies often focus on the patterns of distribution of multiple chronic conditions across the population, rather than the mechanisms shaping these distributions. Robust evidence from longitudinal and interventional studies is needed to

1  
2  
3 understand the pathways between socioeconomic disadvantage and multimorbidity.  
4  
5 Generating such evidence will guide the development of interventions and public policies to  
6  
7 prevent multimorbidity among people living in disadvantage.  
8

9  
10 **Authors contribution statement:**

11 LFA contributed towards the development of search strategy, screening, data extraction and  
12 appraisal of included studies and manuscript preparation. AS contributed towards the design,  
13 development of search strategy, screening, data extraction and appraisal of included studies  
14 and manuscript preparation. EY contributed towards the development of search strategy, data  
15 extraction of included studies and manuscript preparation. TK and DCS contributed towards  
16 the development of search strategy and manuscript preparation. SZ contributed towards  
17 manuscript preparation.  
18  
19

20  
21 **Competing interests**

22 The authors have no competing interests to declare.  
23

24  
25 **Funding**

26 This project was conducted with seed funding provided by the Economic and Social  
27 Participation Research Initiative (ESPRIt) Hallmark Research Initiative by the University of  
28 Melbourne to AS, TK, EY and DCS.  
29

30  
31 **Acknowledgments**

32 TK is also supported by an Australian Research Council Discovery Early Career Research  
33 Award (DE200100607).  
34

35  
36 **Data availability statement**

37 All data relevant to the study are included in the article or uploaded as supplementary  
38 information.  
39

40  
41 **Ethics approval statement**

42 This study uses publicly available data and does not directly involve human participants.  
43  
44  
45  
46  
47  
48  
49  
50  
51  
52  
53  
54  
55  
56  
57  
58  
59  
60



## REFERENCES

1. Xu X, Mishra GD, Dobson AJ, Jones M. Progression of diabetes, heart disease, and stroke multimorbidity in middle-aged women: A 20-year cohort study. *PLoS medicine*. 2018;15(3):e1002516.
2. Tran J, Norton R, Conrad N, Rahimian F, Canoy D, Nazarzadeh M, et al. Patterns and temporal trends of comorbidity among adult patients with incident cardiovascular disease in the UK between 2000 and 2014: A population-based cohort study. *PLoS medicine*. 2018;15(3):e1002513.
3. Stanley J, Semper K, Millar E, Sarfati D. Epidemiology of multimorbidity in New Zealand: a cross-sectional study using national-level hospital and pharmaceutical data. *BMJ open*. 2018;8(5):e021689.
4. The Academy of Medical Sciences. *Multimorbidity: a priority for global health research*. London: The Academy of Medical Sciences; 2018.
5. Wallace E, Salisbury C, Guthrie B, Lewis C, Fahey T, Smith SM. Managing patients with multimorbidity in primary care. *BMJ*. 2015;350:h176.
6. Kingston A, Robinson L, Booth H, Knapp M, Jagger C, project M. Projections of multimorbidity in the older population in England to 2035: estimates from the Population Ageing and Care Simulation (PACSim) model. *Age Ageing*. 2018;47(3):374-80.
7. Iaccarino G, Grassi G, Borghi C, Ferri C, Salvetti M, Volpe M, et al. Age and Multimorbidity Predict Death Among COVID-19 Patients. *Hypertension*. 2020;76(2):366-72.
8. Ataguba JE. Inequalities in multimorbidity in South Africa. *Intern*. 2013;12:64.
9. Jackson CA, Dobson AJ, Tooth LR, Mishra GD. Lifestyle and Socioeconomic Determinants of Multimorbidity Patterns among Mid-Aged Women: A Longitudinal Study. *PloS one*. 2016;11(6):e0156804.
10. Katikireddi SV, Skivington K, Leyland AH, Hunt K, Mercer SW. The contribution of risk factors to socioeconomic inequalities in multimorbidity across the lifecourse: a longitudinal analysis of the Twenty-07 cohort. *BMC medicine*. 2017;15(1):152.
11. Kunna R, San Sebastian M, Stewart Williams J. Measurement and decomposition of socioeconomic inequality in single and multimorbidity in older adults in China and Ghana: results from the WHO study on global AGEing and adult health (SAGE). *Intern*. 2017;16(1):79.
12. Nunes BP, Chiavegatto Filho ADP, Pati S, Cruz Teixeira DS, Flores TR, Camargo-Figuera FA, et al. Contextual and individual inequalities of multimorbidity in Brazilian adults: a cross-sectional national-based study. *BMJ open*. 2017;7(6):e015885.
13. Pathirana TI, Jackson CA. Socioeconomic status and multimorbidity: a systematic review and meta-analysis. *Australian and New Zealand journal of public health*. 2018;42(2):186-94.
14. Ingram E, Ledden S, Beardon S, Gomes M, Hogarth S, McDonald H, et al. Household and area-level social determinants of multimorbidity: a systematic review. *J Epidemiol Community Health*. 2021;75(3):232-41.
15. Arcaya MC, Arcaya AL, Subramanian SV. Inequalities in health: definitions, concepts, and theories. *Glob Health Action*. 2015;8(1):27106.
16. Townsend P, Davidson N, Black DS. *Inequalities in health : the Black report*. Townsend P, Davidson N, Black DS, Great Britain. Working Group on Inequalities in H, editors. Harmondsworth: Penguin; 1982.
17. Bartley M. *Health inequality : an introduction to theories, concepts, and methods*. Cambridge, UK: Polity Press; 2004.
18. Ball K, Timperio A, Salmon J, Giles-Corti B, Roberts R, Crawford D. Personal, social and environmental determinants of educational inequalities in walking: a multilevel study. *J Epidemiol Community Health*. 2007;61(2):108-14.
19. Pan A, Wang Y, Talaei M, Hu FB. Relation of Smoking With Total Mortality and Cardiovascular Events Among Patients With Diabetes Mellitus: A Meta-Analysis and Systematic Review. *Circulation*. 2015;132(19):1795-804.
20. Hughes K, Bellis MA, Hardcastle KA, Sethi D, Butchart A, Mikton C, et al. The effect of multiple adverse childhood experiences on health: a systematic review and meta-analysis. *Lancet Public Health*. 2017;2(8):e356-e66.

21. House JS, Landis KR, Umberson D. Social relationships and health. *Science*. 1988;241(4865):540-5.
22. Shumaker SA, Brownell A. Toward a theory of social support: Closing conceptual gaps. *Journal of social issues*. 1984;40(4):11-36.
23. Baum FE, Ziersch AM. Social capital. *J Epidemiol Community Health*. 2003;57(5):320-3.
24. Kawachi I, Berkman L. Social cohesion, social capital, and health. *Social epidemiology*. 2000;174(7).
25. Kawachi I, Kennedy BP. Health and social cohesion: why care about income inequality? *BMJ*. 1997;314(7086):1037-40.
26. Krieger N. A glossary for social epidemiology. *J Epidemiol Community Health*. 2001;55(10):693-700.
27. Kawachi I, Subramanian SV, Almeida-Filho N. A glossary for health inequalities. *J Epidemiol Community Health*. 2002;56(9):647-52.
28. Levac D, Colquhoun H, O'Brien KK. Scoping studies: advancing the methodology. *Implement Sci*. 2010;5(1):69.
29. Arksey H, O'Malley L. Scoping studies: towards a methodological framework. *International Journal of Social Research Methodology*. 2005;8(1):19-32.
30. Singh A, Harford J, Schuch HS, Watt RG, Peres MA. Theoretical basis and explanation for the relationship between area-level social inequalities and population oral health outcomes - A scoping review. *SSM Popul Health*. 2016;2:451-62.
31. American Psychological Association. Measuring socioeconomic status and subjective social status. Public Interest Directorate, Socioeconomic Status Office, Resources and Publication. 2018.
32. Bonavita V, De Simone R. Towards a definition of comorbidity in the light of clinical complexity. *Neurol Sci*. 2008;29 Suppl 1(1):S99-102.
33. Afshar S, Roderick PJ, Kowal P, Dimitrov BD, Hill AG. Multimorbidity and the inequalities of global ageing: a cross-sectional study of 28 countries using the World Health Surveys. *Bmc Public Health*. 2015;15.
34. Alimohammadian M, Majidi A, Yaseri M, Ahmadi B, Islami F, Derakhshan M, et al. Multimorbidity as an important issue among women: results of a gender difference investigation in a large population-based cross-sectional study in West Asia. *BMJ open*. 2017;7(5):e013548.
35. Ba NV, Minh HV, Quang LB, Chuyen NV, Ha BTT, Dai TQ, et al. Prevalence and correlates of multimorbidity among adults in border areas of the Central Highland Region of Vietnam, 2017. *J*. 2019;9:2235042X19853382.
36. Banjare P, Pradhan J. Socio-economic inequalities in the prevalence of multi-morbidity among the rural elderly in Bargarh District of Odisha (India). *PloS one*. 2014;9(6):e97832.
37. Chung RY, Mercer S, Lai FT, Yip BH, Wong MC, Wong SY. Socioeconomic Determinants of Multimorbidity: A Population-Based Household Survey of Hong Kong Chinese. *PloS one*. 2015;10(10):e0140040.
38. Costa AK, Bertoldi AD, Fontanella AT, Ramos LR, Arrais PSD, Luiza VL, et al. Does socioeconomic inequality occur in the multimorbidity among Brazilian adults? *Rev Saude Publica*. 2020;54((Costa) Universidade Federal de Pelotas. Faculdade de Enfermagem. Programa de Pos-Graduacao em Enfermagem. Pelotas, RS, Brazil(Bertoldi) Universidade Federal de Pelotas. Faculdade de Medicina. Departamento de Medicina Social. Programa de Pos-Graduacao em):138.
39. Costa CDS, Flores TR, Wendt A, Neves RG, Tomasi E, Cesar JA, et al. Inequalities in multimorbidity among elderly: a population-based study in a city in Southern Brazil. *Cad Saude Publica*. 2018;34(11):e00040718.
40. Craig LS, Cunningham-Myrie CA, Hotchkiss DR, Hernandez JH, Gustat J, Theall KP. Social determinants of multimorbidity in Jamaica: application of latent class analysis in a cross-sectional study. *BMC Public Health*. 2021;21(1):1197.
41. Demirchyan A, Khachadourian V, Armenian HK, Petrosyan V. Short and long term determinants of incident multimorbidity in a cohort of 1988 earthquake survivors in Armenia. *Intern*. 2013;12(68):68.
42. Garin N, Koyanagi A, Chatterji S, Tyrovolas S, Olaya B, Leonardi M, et al. Global Multimorbidity Patterns: A Cross-Sectional, Population-Based, Multi-Country Study. *The journals of gerontology Series A, Biological sciences and medical sciences*. 2016;71(2):205-14.



- 1
  - 2
  - 3
  - 4
  - 5
  - 6
  - 7
  - 8
  - 9
  - 10
  - 11
  - 12
  - 13
  - 14
  - 15
  - 16
  - 17
  - 18
  - 19
  - 20
  - 21
  - 22
  - 23
  - 24
  - 25
  - 26
  - 27
  - 28
  - 29
  - 30
  - 31
  - 32
  - 33
  - 34
  - 35
  - 36
  - 37
  - 38
  - 39
  - 40
  - 41
  - 42
  - 43
  - 44
  - 45
  - 46
  - 47
  - 48
  - 49
  - 50
  - 51
  - 52
  - 53
  - 54
  - 55
  - 56
  - 57
  - 58
  - 59
  - 60
43. Habib RR, Hojeij S, Elzein K, Chaaban J, Seyfert K. Associations between life conditions and multi-morbidity in marginalized populations: the case of Palestinian refugees. *European journal of public health*. 2014;24(5):727-33.
44. Odland ML, Payne C, Witham MD, Siedner MJ, Barnighausen T, Bountogo M, et al. Epidemiology of multimorbidity in conditions of extreme poverty: a population-based study of older adults in rural Burkina Faso. *BMJ Glob Health*. 2020;5(3):e002096.
45. Pati S, Swain S, Knottnerus JA, Metsemakers JFM, van den Akker M. Magnitude and determinants of multimorbidity and health care utilization among patients attending public versus private primary care: a cross-sectional study from Odisha, India. *Intern*. 2020;19(1):57.
46. Sharma P, Maurya P. Gender differences in the Prevalence and Pattern of Disease Combination of Chronic Multimorbidity among Indian Elderly. *Ageing International*. 2021.
47. Vidhyashree MD, Adhilakshmi R, Kamini B. Socio-Economic Determinants of Multimorbidity among the Elderly Population in a Rural Area in Kancheepuram District of Tamil Nadu. *Journal of Research in Medical and Dental Science*. 2021;9(7):436-41.
48. Weimann A, Dai D, Oni T. A cross-sectional and spatial analysis of the prevalence of multimorbidity and its association with socioeconomic disadvantage in South Africa: A comparison between 2008 and 2012. *Social science & medicine (1982)*. 2016;163:144-56.
49. Zhao Y, Atun R, Oldenburg B, McPake B, Tang S, Mercer SW, et al. Physical multimorbidity, health service use, and catastrophic health expenditure by socioeconomic groups in China: an analysis of population-based panel data. *The Lancet Global Health*. 2020;8(6):e840-e9.
50. Alaba O, Chola L. The social determinants of multimorbidity in South Africa. *Intern*. 2013;12:63.
51. Hone T, Stokes J, Trajman A, Saraceni V, Coeli CM, Rasella D, et al. Racial and socioeconomic disparities in multimorbidity and associated healthcare utilisation and outcomes in Brazil: a cross-sectional analysis of three million individuals. *BMC Public Health*. 2021;21(1):1287.
52. Barnett K, Mercer SW, Norbury M, Watt G, Wyke S, Guthrie B. Epidemiology of multimorbidity and implications for health care, research, and medical education: a cross-sectional study. *Lancet*. 2012;380(9836):37-43.
53. Cornish RP, Boyd A, Van Staa T, Salisbury C, Macleod J. Socio-economic position and childhood multimorbidity: a study using linkage between the Avon Longitudinal Study of Parents and Children and the General Practice Research Database. *Intern*. 2013;12(66):66.
54. Russell J, Morton SMB, Grant CC. Multimorbidity in Early Childhood and Socioeconomic Disadvantage: Findings From a Large New Zealand Child Cohort. *Academic Pediatrics*. 2020;20(5):619-27.
55. Aminisani N, Stephens C, Allen J, Alpass F, Shamshirgaran SM. Socio-demographic and lifestyle factors associated with multimorbidity in New Zealand. *Epidemiol Health*. 2020;42((Aminisani) Department of Epidemiology and Statistics, Faculty of Health Sciences, Neyshabur University of Medical Sciences, Neyshabur, Iran, Islamic Republic of(Aminisani, Shamshirgaran) Healthy Aging Research Centre, Neyshabur University of Medical Scie):e2020001.
56. Calderon-Larranaga A, Santoni G, Wang HX, Welmer AK, Rizzuto D, Vetrano DL, et al. Rapidly developing multimorbidity and disability in older adults: does social background matter? *Journal of internal medicine*. 2018;283(5):489-99.
57. Calvo E, Azar A, Shura R, Staudinger UM. A New Path to Address Multimorbidity? Longitudinal Analyses of Retirement Sequences and Chronic Diseases in Old Age. *J Appl Gerontol*. 2021((Calvo, Staudinger) Columbia University, New York, NY, United States(Calvo, Azar) Universidad Mayor, Santiago, Chile(Azar) University of Chicago, IL, United States(Shura) Kent State University at Stark, North Canton, OH, United States(Staudinger) Technica):7334648211031038.
58. Canizares M, Hogg-Johnson S, Gignac MAM, Glazier RH, Badley EM. Increasing Trajectories of Multimorbidity Over Time: Birth Cohort Differences and the Role of Changes in Obesity and Income. *J Gerontol B Psychol Sci Soc Sci*. 2018;73(7):1303-14.
59. Dugravot A, Fayosse A, Dumurgier J, Bouillon K, Rayana TB, Schnitzler A, et al. Social inequalities in multimorbidity, frailty, disability, and transitions to mortality: a 24-year follow-up of the Whitehall II cohort study. *Lancet Public Health*. 2020;5(1):e42-e50.

- 1  
2  
3 60. Hayek S, Ifrah A, Enav T, Shohat T. Prevalence, Correlates, and Time Trends of Multiple  
4 Chronic Conditions Among Israeli Adults: Estimates From the Israeli National Health Interview  
5 Survey, 2014-2015. *Preventing chronic disease*. 2017;14:E64.
- 6 61. Head A, Fleming K, Kypridemos C, Schofield P, Pearson-Stuttard J, O'Flaherty M.  
7 Inequalities in incident and prevalent multimorbidity in England, 2004–19: a population-based,  
8 descriptive study. *The Lancet Healthy Longevity*. 2021;2(8):e489-e97.
- 9 62. Johnston MC, Black C, Mercer SW, Prescott GJ, Crilly MA. Impact of educational attainment  
10 on the association between social class at birth and multimorbidity in middle age in the Aberdeen  
11 Children of the 1950s cohort study. *BMJ open*. 2019;9(1):e024048.
- 12 63. Khanolkar AR, Chaturvedi N, Kuan V, Davis D, Hughes A, Richards M, et al.  
13 Socioeconomic inequalities in prevalence and development of multimorbidity across adulthood: A  
14 longitudinal analysis of the MRC 1946 National Survey of Health and Development in the UK. *PLoS*  
15 *medicine*. 2021;18(9):e1003775.
- 16 64. Ki M, Lee YH, Kim YS, Shin JY, Lim J, Nazroo J. Socioeconomic inequalities in health in  
17 the context of multimorbidity: A Korean panel study. *PloS one*. 2017;12(3):e0173770.
- 18 65. Kim J, Keshavjee S, Atun R. Trends, patterns and health consequences of multimorbidity  
19 among South Korea adults: Analysis of nationally representative survey data 2007-2016. *J Glob*  
20 *Health*. 2020;10(2):020426.
- 21 66. Lee SA, Joo S, Chai HW, Jun HJ. Patterns of multimorbidity trajectories and their correlates  
22 among Korean older adults. *Age Ageing*. 2021;50(4):1336-41.
- 23 67. Moller SP, Laursen B, Johannesen CK, Tolstrup JS, Schramm S. Patterns of multimorbidity  
24 and demographic profile of latent classes in a Danish population-A register-based study. *PloS one*.  
25 2020;15(8):e0237375.
- 26 68. Park B, Lee HA, Park H. Use of latent class analysis to identify multimorbidity patterns and  
27 associated factors in Korean adults aged 50 years and older. *PloS one*. 2019;14(11):e0216259.
- 28 69. Schafer I, Hansen H, Schon G, Hofels S, Altiner A, Dahlhaus A, et al. The influence of age,  
29 gender and socio-economic status on multimorbidity patterns in primary care. First results from the  
30 multicare cohort study. *BMC Health Serv Res*. 2012;12(1):89.
- 31 70. Seo S. Multimorbidity Development in Working People. *Int J Environ Res Public Health*.  
32 2019;16(23).
- 33 71. Singh A, Contreras Suarez D, You E, Fleitas Alfonso L, King T. Role of social support in the  
34 relationship between financial hardship and multimorbidity-a causal mediation analysis. *European*  
35 *journal of public health*. 2021;31(3):482-7.
- 36 72. Tomasdottir MO, Sigurdsson JA, Petursson H, Kirkengen AL, Ivar Lund Nilsen T, Hetlevik I,  
37 et al. Does 'existential unease' predict adult multimorbidity? Analytical cohort study on embodiment  
38 based on the Norwegian HUNT population. *BMJ open*. 2016;6(11):e012602.
- 39 73. Tucker-Seeley RD, Li Y, Sorensen G, Subramanian SV. Lifecourse socioeconomic  
40 circumstances and multimorbidity among older adults. *BMC Public Health*. 2011;11:313.
- 41 74. Zacarias-Pons L, Vilalta-Franch J, Turro-Garriga O, Saez M, Garre-Olmo J. Multimorbidity  
42 patterns and their related characteristics in European older adults: A longitudinal perspective. *Arch*  
43 *Gerontol Geriatr*. 2021;95((Zacarias-Pons, Vilalta-Franch, Turro-Garriga, Garre-Olmo) Research  
44 Group on Aging, Disability and Health, Girona Biomedical Research Institute (IDIBGI), Catalonia,  
45 Spain(Turro-Garriga, Garre-Olmo) Institut d'Assistencia Sanitaria, Catalonia, Spain(Saez)):104428.
- 46 75. Zou S, Wang Z, Bhura M, Zhang G, Tang K. Prevalence and associated socioeconomic  
47 factors of multimorbidity in ten regions of China: a cross-sectional analysis. *The Lancet*.  
48 2020;396(Supplement 1):S12.
- 49 76. Hernandez B, Voll S, Lewis NA, McCrory C, White A, Stirland L, et al. Comparisons of  
50 disease cluster patterns, prevalence and health factors in the USA, Canada, England and Ireland. *BMC*  
51 *Public Health*. 2021;21(1):1674.
- 52 77. McLean G, Gunn J, Wyke S, Guthrie B, Watt GC, Blane DN, et al. The influence of  
53 socioeconomic deprivation on multimorbidity at different ages: a cross-sectional study. *The British*  
54 *journal of general practice : the journal of the Royal College of General Practitioners*.  
55 2014;64(624):e440-7.
- 56  
57  
58  
59  
60

- 1  
2  
3 78. Andersen H, Kankaanranta H, Tuomisto LE, Piirila P, Sovijarvi A, Langhammer A, et al. Multimorbidity in Finnish and Swedish speaking Finns; association with daily habits and  
4 socioeconomic status - Nordic EpiLung cross-sectional study. *Prev Med Rep.* 2021;22:101338.  
5  
6 79. Mondor L, Cohen D, Khan AI, Wodchis WP. Income inequalities in multimorbidity  
7 prevalence in Ontario, Canada: a decomposition analysis of linked survey and health administrative  
8 data. *Intern.* 2018;17(1):90.  
9  
10 80. Puth MT, Weckbecker K, Schmid M, Munster E. Prevalence of multimorbidity in Germany:  
11 impact of age and educational level in a cross-sectional study on 19,294 adults. *BMC Public Health.*  
12 2017;17(1):826.  
13 81. Wister A, Rosenkrantz L, Shashank A, Walker BB, Schuurman N. Multimorbidity and  
14 Socioeconomic Deprivation among Older Adults: A Cross-sectional Analysis in Five Canadian Cities  
15 Using the CLSA. *Journal of Aging and Environment.* 2020;34(4):435-54.  
16 82. Chamberlain AM, Finney Rutten LJ, Wilson PM, Fan C, Boyd CM, Jacobson DJ, et al.  
17 Correction to: Neighborhood socioeconomic disadvantage is associated with multimorbidity in a  
18 geographically-defined community. *BMC Public Health.* 2020;20(1):1412.  
19 83. Vinjerui KH, Bjerkeset O, Bjorngaard JH, Krokstad S, Douglas KA, Sund ER.  
20 Socioeconomic inequalities in the prevalence of complex multimorbidity in a Norwegian population:  
21 findings from the cross-sectional HUNT Study. *BMJ open.* 2020;10(6):e036851.  
22 84. Yildiz B, Schuring M, Knoef MG, Burdorf A. Chronic diseases and multimorbidity among  
23 unemployed and employed persons in the Netherlands: a register-based cross-sectional study. *BMJ*  
24 *open.* 2020;10(7):e035037.  
25 85. Agborsangaya CB, Lau D, Lahtinen M, Cooke T, Johnson JA. Multimorbidity prevalence and  
26 patterns across socioeconomic determinants: a cross-sectional survey. *BMC Public Health.*  
27 2012;12:201.  
28 86. Antonovsky A, Sourani T. Family sense of coherence and family adaptation. *Journal of*  
29 *Marriage and the Family.* 1988:79-92.  
30 87. Hill AB. The Environment and Disease: Association or Causation? *Proceedings of the Royal*  
31 *Society of Medicine.* 1965;58:295-300.  
32 88. VanderWeele TJ. *Explanation in causal inference : methods for mediation and interaction:*  
33 *New York Oxford University Press, [2015]; 2015.*  
34 89. Moin JS, Glazier RH, Kuluski K, Kiss A, Upshur REG. Examine the association between key  
35 determinants identified by the chronic disease indicator framework and multimorbidity by rural and  
36 urban settings. *J.* 2021;11(101693146):26335565211028157.  
37 90. Stokes T, Azam M, Noble FD. Multimorbidity in Maori and Pacific patients: cross-sectional  
38 study in a Dunedin general practice. *J Prim Health Care.* 2018;10(1):39-43.  
39 91. Nielsen CR, Halling A, Andersen-Ranberg K. Disparities in multimorbidity across Europe–  
40 findings from the SHARE survey. *European Geriatric Medicine.* 2017;8(1):16-21.  
41 92. Congdon P. Area variations in multiple morbidity using a life table methodology. *Health Serv*  
42 *Outcomes Res Methodol.* 2016;16:58-74.  
43 93. Diaz E, Poblador-Pou B, Gimeno-Feliu LA, Calderon-Larranaga A, Kumar BN, Prados-  
44 Torres A. Multimorbidity and Its Patterns according to Immigrant Origin. A Nationwide Register-  
45 Based Study in Norway. *PloS one.* 2015;10(12):e0145233.  
46 94. Prazeres F, Santiago L. Prevalence of multimorbidity in the adult population attending  
47 primary care in Portugal: a cross-sectional study. *BMJ open.* 2015;5(9):e009287.  
48 95. Roberts K, Rao D, Bennett T, Loukine L, Jayaraman G. Prevalence and patterns of chronic  
49 disease multimorbidity and associated determinants in Canada. *Health promotion and chronic disease*  
50 *prevention in Canada: research, policy and practice.* 2015;35(6):87.  
51 96. Violan C, Foguet-Boreu Q, Fernandez-Bertolin S, Guisado-Clavero M, Cabrera-Bean M,  
52 Formiga F, et al. Soft clustering using real-world data for the identification of multimorbidity patterns  
53 in an elderly population: Cross-sectional study in a Mediterranean population. *BMJ open.* 2019;9 (8)  
54 (no pagination)(e029594).  
55  
56  
57  
58  
59  
60

Table 1. Study selection criteria.

| Inclusion criteria                                                                                                                                                                                                                                                                                                                                                                                                                                        | Exclusion criteria                                                                                                                                                                                                                                                                                  |
|-----------------------------------------------------------------------------------------------------------------------------------------------------------------------------------------------------------------------------------------------------------------------------------------------------------------------------------------------------------------------------------------------------------------------------------------------------------|-----------------------------------------------------------------------------------------------------------------------------------------------------------------------------------------------------------------------------------------------------------------------------------------------------|
| <ul style="list-style-type: none"> <li>-Studies with participants from any age group</li> <li>-Community representative participants</li> <li>-Individual and population-based epidemiological studies looking at the association between socio-economic disadvantage and multi-morbidity</li> <li>-Intervention studies involving examining moderators or mediators derived from theoretical constructs</li> <li>-Studies in English language</li> </ul> | <ul style="list-style-type: none"> <li>-Studies on institutionalised individuals</li> <li>-Studies on comorbidity</li> <li>-Qualitative studies</li> <li>-Study protocols, editorials and commentaries that do not report on association between social disadvantage and multi-morbidity</li> </ul> |

Table 2. Summary characteristics of included studies

| Study                      | Study design    | Location                | Population focus                  | Assessment of multimorbidity (Presence/Nature/Extent/Both)   | List of chronic conditions                                                                                                                                                                                | Measure of Socioeconomic disadvantage            |
|----------------------------|-----------------|-------------------------|-----------------------------------|--------------------------------------------------------------|-----------------------------------------------------------------------------------------------------------------------------------------------------------------------------------------------------------|--------------------------------------------------|
| Andersen et al. 2021 (78)  | Cross-sectional | Finland                 | Adults aged 20-69 years           | Presence of multimorbidity<br>Cut-off of 2 conditions        | 18 chronic conditions including: respiratory diseases, cardiovascular diseases, diabetes, mental disorders, dyspepsia/reflux disease, chronic kidney failure, sleep apnea, osteoporosis, and chronic pain | Occupation.                                      |
| Calvo et al. 2021 (57)     | Longitudinal    | US                      | Adults aged 60-61 and 70-71 years | Count of chronic conditions                                  | Eight conditions including high blood pressure, diabetes, cancer, chronic lung disease, heart problems, stroke, mental illness, arthritis or rheumatism.                                                  | Retirement sequence                              |
| Craig et al. 2021 (40)     | Cross-sectional | Jamaica                 | Individuals aged 15-74 years      | Patterns of multimorbidity                                   | 11 chronic conditions including hypertension, obesity, hypercholesterolemia, diabetes, asthma, arthritis, cardiovascular disease, mental health disorders, COPD, stroke, and glaucoma.                    | Occupational status, education and income level. |
| Head et al. 2021 (61)      | Longitudinal    | England                 | Adults aged 18 years and over     | Presence of multimorbidity.<br>Cut-off of 2 and 3 conditions | 211 conditions listed elsewhere (62)                                                                                                                                                                      | Area level deprivation                           |
| Hernandez et al. 2021 (76) | Cross-sectional | 4 high income countries | Adults aged 52-85 years           | Patterns of multimorbidity                                   | 10 conditions including cardiovascular diseases, diabetes, arthritis, cancer, lung disease,                                                                                                               | Education, household income and employment.      |



| Study                      | Study design    | Location    | Population focus              | Assessment of multimorbidity (Presence/Nature/Extent/Both)  | List of chronic conditions                                                                                                                                                                                                                                    | Measure of Socioeconomic disadvantage      |
|----------------------------|-----------------|-------------|-------------------------------|-------------------------------------------------------------|---------------------------------------------------------------------------------------------------------------------------------------------------------------------------------------------------------------------------------------------------------------|--------------------------------------------|
|                            |                 |             |                               |                                                             | osteoporosis. and psychological disorders                                                                                                                                                                                                                     |                                            |
| Hone et al. 2021 (51)      | Cross-sectional | Brazil      | Individuals of any age        | Presence of multimorbidity<br>Count of chronic conditions   | 53 chronic conditions                                                                                                                                                                                                                                         | Education                                  |
| Khanolkar et al. 2021 (63) | Longitudinal    | UK          | Adults aged 36 to 69 years    | Presence of multimorbidity<br>Count of chronic conditions   | 18 health conditions including metabolic conditions, cardiovascular diseases, cancer, respiratory disorders, kidney disorders, gastrointestinal disorders, skin disorders, osteoarthritis, rheumatoid arthritis, neurological disorders and mental disorders. | Social class and education                 |
| Lee et al. 2021 (66)       | Longitudinal    | South Korea | Adults aged 45 years and over | Multimorbidity clusters<br>Cut-off of 2 conditions          | 9 chronic conditions including: hypertension, diabetes, cancer, chronic lung disease, liver disease, heart disease, cerebrovascular disease, arthritis or rheumatoid arthritis and depression                                                                 | Education, household income and employment |
| Moin et al. 2021 (89)      | Cross-sectional | Canada      | Adults aged 22 to 95 years    | Presence of multimorbidity<br>Cut-off of 2 and 3 conditions | 18 chronic diseases including cardiovascular diseases, respiratory conditions, diabetes, mental illness, musculoskeletal conditions, renal                                                                                                                    | Household income and education             |

| Study                          | Study design    | Location | Population focus                       | Assessment of multimorbidity (Presence/Nature/Extent/Both)             | List of chronic conditions                                                                                                                                                                                                                                                                                                  | Measure of Socioeconomic disadvantage                   |
|--------------------------------|-----------------|----------|----------------------------------------|------------------------------------------------------------------------|-----------------------------------------------------------------------------------------------------------------------------------------------------------------------------------------------------------------------------------------------------------------------------------------------------------------------------|---------------------------------------------------------|
|                                |                 |          |                                        |                                                                        | failure, inflammatory bowel failure and cancers.                                                                                                                                                                                                                                                                            |                                                         |
| Zacarias-Pons et al. 2021 (74) | Longitudinal    | Europe   | People aged 50 years and older         | Latent transition analysis for types of multimorbidity                 | Heart attack, hypertension, hypercholesterolaemia, stroke or cerebral vascular disease, diabetes or high blood sugar, chronic lung disease [COPD], cancer, stomach or duodenal ulcer, Parkinson disease, cataracts, dementia, other affective or emotional disorders, rheumatoid arthritis, osteoarthritis and osteoporosis | Education, employment and material deprivation index    |
| Vidyashree et al 2021 (47)     | Cross-sectional | India    | People aged 60 and above in rural area | Presence of multimorbidity (Cut off unclear)                           | Unclear                                                                                                                                                                                                                                                                                                                     | Economic dependency                                     |
| Sharma 2021 (46)               | Cross-sectional | India    | People aged 60 and above               | Presence and patterns of multimorbidity<br><br>Cut-off of 2 conditions | Arthritis, Rheumatism or Osteoarthritis, Cerebral embolism stroke or Thrombosis, Heart diseases, Diabetes, Chronic lung disease, Asthma, Depression, Hypertension, Alzheimer's disease, Cancer, Dementia, Liver or Gall bladder illness, Osteoporosis, Renal or Urinary tract infection, Cataract,                          | Educational attainment, working status, wealth quintile |

| Study                        | Study design    | Location    | Population focus              | Assessment of multimorbidity (Presence/Nature/Extent/Both) | List of chronic conditions                                                                                                                                                                                       | Measure of Socioeconomic disadvantage |
|------------------------------|-----------------|-------------|-------------------------------|------------------------------------------------------------|------------------------------------------------------------------------------------------------------------------------------------------------------------------------------------------------------------------|---------------------------------------|
|                              |                 |             |                               |                                                            | Loss of all-natural teeth, Accidental injury in the past one year, injury due to fall, skin disease and paralysis                                                                                                |                                       |
| Singh 2021 (71)              | Longitudinal    | Australia   | People aged 15 and above      | Presence of multimorbidity<br>Cut-off of 2 conditions      | Arthritis, cancer, type 1 diabetes mellitus, type 2 diabetes mellitus, hypertension, heart disease, asthma, bronchitis or depression                                                                             | Financial hardship                    |
| Aminisani et al. 2019 (55)   | Longitudinal    | New Zealand | Adults aged 55-70 year        | Presence of multimorbidity<br>Cut-off of 2 conditions      | Nine groups of chronic diseases: cardiovascular diseases, neurologic diseases, musculoskeletal conditions, diabetes mellitus, respiratory diseases, chronic liver conditions, cancer and mental disorders.       | Education and income                  |
| Chamberlain et al. 2020 (82) | Cross-sectional | US          | Adults aged 20 years and over | Presence of multimorbidity.<br>Cut-off of 2 conditions     | 21 conditions including cardiovascular diseases, metabolic conditions, respiratory diseases, arthritis, osteoporosis, chronic kidney disease, autism spectrum disorder, hepatitis, human immunodeficiency virus, | Area level deprivation                |



| Study                   | Study design    | Location     | Population focus               | Assessment of multimorbidity (Presence/Nature/Extent/Both)         | List of chronic conditions                                                                                                                                                         | Measure of Socioeconomic disadvantage |
|-------------------------|-----------------|--------------|--------------------------------|--------------------------------------------------------------------|------------------------------------------------------------------------------------------------------------------------------------------------------------------------------------|---------------------------------------|
|                         |                 |              |                                |                                                                    | depression, dementia, schizophrenia, and substance                                                                                                                                 |                                       |
| Costa et al. 2020 (38)  | Cross-sectional | Brazil       | Adults aged 20-59 years        | Presence of multimorbidity<br>Cut-off of 2 conditions              | 14 conditions including cardiovascular diseases, metabolic diseases, chronic pulmonary disease, digestive disorders, neurological disorders, cancer, kidney disease and depression | Economic status and education         |
| Kim et al. 2020 (65)    | Longitudinal    | South Korea  | Adults aged 19 years and over  | Presence of multimorbidity<br>Cut-off of 2 conditions              | 28 chronic conditions as listed elsewhere (63)                                                                                                                                     | Household income and education        |
| Moller et al. 2020 (67) | Longitudinal    | Denmark      | People aged 16 years and over  | Multimorbidity patterns or classes (LCA)                           | 47 diseases                                                                                                                                                                        | Education and employment              |
| Odland et al. 2020 (44) | Cross-sectional | Burkina Faso | Adults aged 40 years and older | Presence and patterns of multimorbidity<br>Cut-off of 2 conditions | 11 conditions including: cancer, HIV, chronic respiratory disease, stroke heart disease, hypertension, diabetes, anxiety, depression and dementia/cognitive decline.               | Education and wealth                  |

| Study                   | Study design    | Location    | Population focus               | Assessment of multimorbidity (Presence/Nature/Extent/Both)                                                  | List of chronic conditions                                                                                                                                                                                                                                                                                                 | Measure of Socioeconomic disadvantage   |
|-------------------------|-----------------|-------------|--------------------------------|-------------------------------------------------------------------------------------------------------------|----------------------------------------------------------------------------------------------------------------------------------------------------------------------------------------------------------------------------------------------------------------------------------------------------------------------------|-----------------------------------------|
| Pati et al. 2020 (45)   | Cross-sectional | India       | Adults aged 18 years and older | Presence of multimorbidity<br>Cut-off of 2 conditions                                                       | 21 chronic conditions                                                                                                                                                                                                                                                                                                      | Poverty level and education             |
| Zhao et al. 2020 (49)   | Longitudinal    | China       | People aged 50 years and older | Presence of multimorbidity.<br>Cut-off of 2 conditions                                                      | Diagnosed                                                                                                                                                                                                                                                                                                                  | Annual per-capita household consumption |
| Yidiz et al. 2020 (84)  | Cross-sectional | Netherlands | People aged 18-64 years        | Presence of multimorbidity<br>Cut-off of 2 and 3 conditions most prevalent chronic diseases (cardiovascular | List of most prevalent chronic diseases (cardiovascular diseases, psychological disorders, inflammatory conditions and respiratory diseases)                                                                                                                                                                               | Employment status and education         |
| Wister et al. 2020 (81) | Cross-sectional | Canada      | People aged 45-85 years        | Presence of multimorbidity<br>Cut-off of 2 conditions                                                       | High blood pressure, osteoarthritis, back problems, cancer, diabetes, heart disease, thyroid dysfunction, lung disease, osteoporosis, urinary incontinence, migraine headaches, irritable bowel syndrome, intestinal and stomach ulcer, glaucoma, peripheral vascular disease, angina, macular degeneration, heart attack, | Vancouver                               |

| Study               | Study design    | Location | Population focus                   | Assessment of multimorbidity (Presence/Nature/Extent/Both)                                              | List of chronic conditions                                                                                                                                                                                                                                                                                       | Measure of Socioeconomic disadvantage     |
|---------------------|-----------------|----------|------------------------------------|---------------------------------------------------------------------------------------------------------|------------------------------------------------------------------------------------------------------------------------------------------------------------------------------------------------------------------------------------------------------------------------------------------------------------------|-------------------------------------------|
|                     |                 |          |                                    |                                                                                                         | transient ischemic attack, kidney disease, rheumatoid arthritis, bowel incontinence, stroke, multiple sclerosis, epilepsy, Parkinson's disease, as well as dementia and Alzheimer's disease.                                                                                                                     |                                           |
| Vinjerui 2020 (83)  | Cross-sectional | Norway   | People aged 25-100 years           | Complex multimorbidity<br>Three or more diseases involving three or more different body (organ) systems | 51 chronic conditions including following body systems or types: neoplasms; endocrine/nutritional/metabolic; mental/behavioural; eye/adnexa; ear/mastoid; circulatory system; respiratory system; digestive system; skin/subcutaneous tissue; musculoskeletal/ connective tissue and genitourinary systems       | Occupational groups                       |
| Ba et al. 2019 (35) | Cross-sectional | Vietnam  | Individuals aged 15 years and over | Presence of multimorbidity.<br>Cut-off of 2 conditions                                                  | A list of 11 conditions including: cancer, heart and circulatory conditions, chronic joint problems, chronic pulmonary diseases, chronic kidney problems, chronic digestive problems, psychological illness, diabetes, and/or other chronic conditions (such as eye, nose, sore and throat, teeth problems, etc) | Educational level and occupational status |

| Study                     | Study design | Location    | Population focus               | Assessment of multimorbidity (Presence/Nature/Extent/Both)               | List of chronic conditions                                                                                                                                                   | Measure of Socioeconomic disadvantage                                                                                      |
|---------------------------|--------------|-------------|--------------------------------|--------------------------------------------------------------------------|------------------------------------------------------------------------------------------------------------------------------------------------------------------------------|----------------------------------------------------------------------------------------------------------------------------|
| Dugravot et al. 2019 (59) | Longitudinal | UK          | Adults aged 35-55 years        | Presence of multimorbidity<br>Cut-off of 2 and 5 conditions              | 9 conditions including diabetes, coronary heart disease, stroke, chronic obstructive pulmonary disease, depression, arthritis, cancer, dementia and Parkinson's disease      | Occupational position, education.                                                                                          |
| Johnston et al. 2019 (62) | Longitudinal | Scotland    | Adults aged 45 to 51 years     | Presence of multimorbidity<br>Cut-off of 2 conditions                    | Six conditions. List not provided                                                                                                                                            | Father's occupation during childhood. Educational attainment in adulthood                                                  |
| Park et al. 2019 (68)     | Longitudinal | South Korea | Adults aged 50 years and older | Presence and patterns of multimorbidity (LCA)<br>Cut-off of 2 conditions | 10 chronic diseases: hypertension, dyslipidaemia, stroke, osteoarthritis, tuberculosis, asthma, allergic                                                                     | Household income, educational level and occupation                                                                         |
| Russell et al 2019 (54)   | Longitudinal | New Zealand | Age 2 years                    | Presence of multimorbidity<br>Cut-off of 2 conditions                    | Asthma requiring medication, eczema requiring medication, a birth condition, epilepsy, permanent hearing problems, vision problems not correctable with glasses, and obesity | Index constructed from maternal education, employment, financial stress, beneficiary status, housing tenure, overcrowding, |

| Study                               | Study design    | Location    | Population focus              | Assessment of multimorbidity (Presence/Nature/Extent/Both)                                                                      | List of chronic conditions                                                                                                                                                                                         | Measure of Socioeconomic disadvantage                                     |
|-------------------------------------|-----------------|-------------|-------------------------------|---------------------------------------------------------------------------------------------------------------------------------|--------------------------------------------------------------------------------------------------------------------------------------------------------------------------------------------------------------------|---------------------------------------------------------------------------|
|                                     |                 |             |                               |                                                                                                                                 |                                                                                                                                                                                                                    | and residential mobility                                                  |
| Seo 2019 (70)                       | Longitudinal    | South Korea | Working age adults            | Presence of multimorbidity<br>Cut-off of 2 conditions                                                                           | 23 conditions                                                                                                                                                                                                      | Type of employment, income, education                                     |
| Calderon-Larrañaga et al. 2018 (56) | Longitudinal    | Sweden      | Adults aged 60 years and over | Presence of multimorbidity was explored as rapid or slow development of multiple chronic conditions.<br>Cut-off of 2 conditions | List not provided. A disease was considered chronic if it had a long and if residual disability remained or life quality was worsened or long period of care, treatment or rehabilitation was needed.              | Educational level and occupation                                          |
| Costa et al. 2018 (39)              | Cross-sectional | Brazil      | Adults aged 60 years and over | Presence and nature of multimorbidity<br>Cut-off of 2 conditions                                                                | 31 conditions: cardiovascular diseases, metabolic conditions, musculoskeletal conditions, incontinence and constipation, neurological diseases, mental disorders, cancer, respiratory diseases and kidney disease. | Educational level and monthly income per capita (National Economic Index) |

| Study                           | Study design    | Location    | Population focus                                 | Assessment of multimorbidity (Presence/Nature/Extent/Both) | List of chronic conditions                                                                                                                                                                                                            | Measure of Socioeconomic disadvantage                |
|---------------------------------|-----------------|-------------|--------------------------------------------------|------------------------------------------------------------|---------------------------------------------------------------------------------------------------------------------------------------------------------------------------------------------------------------------------------------|------------------------------------------------------|
| Mondor et al. 2018 (79)         | Cross-sectional | Canada      | Adults aged 18 years and older                   | Presence of multimorbidity<br>Cut-off of 2 conditions      | 12 chronic conditions including high blood pressure, diabetes, osteoarthritis, rheumatoid arthritis, heart attack, stroke, cancer, chronic lung disease, hip fracture, Parkinson's disease, Alzheimer's disease, affective disorders. | Household income and educational level inequalities. |
| Stanley et al. 2018 (3)         | Cross-sectional | New Zealand | Adults aged 18 years and older                   | Presence of multimorbidity.<br>Cut-off of 2 conditions     | List of diseases not provided but listed elsewhere (64).                                                                                                                                                                              | Area based measure of socioeconomic deprivation      |
| Stokes et al. 2018 (90)         | Cross-sectional | New Zealand | Pacific and Maori adults aged 35 years and older | Presence of multimorbidity.<br>Cut-off of 2 conditions     | 31 chronic conditions                                                                                                                                                                                                                 | Area based measure of socioeconomic deprivation      |
| Alimohammadian et al. 2017 (34) | Cross-sectional | Iran        | Adults aged 40-75 years                          | Presence of multimorbidity.<br>Cut-off of 2 conditions     | A total of nine conditions were explored: cardiovascular disease, diabetes (type I and II), chronic obstructive pulmonary disease, chronic liver disease, tuberculosis, gastro-oesophageal reflux disease (GORD), and cancers         | Socioeconomic status. Education.                     |
| Canizares et al. 2017 (58)      | Longitudinal    | Canada      | Adults aged 20-69                                | Presence and extent of multimorbidity.                     | 18 chronic conditions were explored: arthritis, back problems, respiratory conditions, allergies                                                                                                                                      | Education, and household income.                     |

| Study                        | Study design    | Location              | Population focus              | Assessment of multimorbidity (Presence/Nature/Extent/Both)        | List of chronic conditions                                                                                                                                                         | Measure of Socioeconomic disadvantage                                 |
|------------------------------|-----------------|-----------------------|-------------------------------|-------------------------------------------------------------------|------------------------------------------------------------------------------------------------------------------------------------------------------------------------------------|-----------------------------------------------------------------------|
|                              |                 |                       |                               | Cut-off of 2 conditions                                           | (excluding food allergies), cardiovascular diseases, diabetes, cancer, ulcers, urinary incontinency, dementia, migraine, glaucoma, and cataracts.                                  |                                                                       |
| Hayek et al. 2017 (60)       | Longitudinal    | Israel                | Adults aged 21 years and over | Presence of multimorbidity.<br>Cut-off of 2 conditions            | 10 conditions were assessed: asthma, arthritis, cancer, diabetes, dyslipidemia, heart attack, hypertension, migraine, osteoporosis, or thyroid disease.                            | Monthly household income and years of schooling                       |
| Katikireddi et al. 2017 (10) | Longitudinal    | Scotland              | Adults aged 35 to 75 years    | Presence and extent of multimorbidity.<br>Cut-off of 2 conditions | 40 conditions                                                                                                                                                                      | Area-based deprivation level.                                         |
| Ki et al. 2017 (64)          | Longitudinal    | South Korea           | Adults aged 30 years and over | Presence and extent of multimorbidity.<br>Cut-off of 2 conditions | 66 chronic conditions.                                                                                                                                                             | Educational attainment, employment status and relative poverty index. |
| Nielsen et al. 2017 (91)     | Cross-sectional | 15 European countries | Adults aged 50 years and over | Presence of multimorbidity.<br>Cut-off of 2 conditions            | 13 chronic conditions: high blood pressure, diabetes, osteoarthritis, rheumatoid arthritis, heart attack, stroke, cancer, chronic lung disease, hip fracture, Parkinson's disease, | Educational level, household income.                                  |

| Study                  | Study design    | Location   | Population focus                | Assessment of multimorbidity (Presence/Nature/Extent/Both) | List of chronic conditions                                                                                                                                                                                                                                                                   | Measure of Socioeconomic disadvantage          |
|------------------------|-----------------|------------|---------------------------------|------------------------------------------------------------|----------------------------------------------------------------------------------------------------------------------------------------------------------------------------------------------------------------------------------------------------------------------------------------------|------------------------------------------------|
|                        |                 |            |                                 |                                                            | Alzheimer's disease, affective disorders.                                                                                                                                                                                                                                                    |                                                |
| Nunes et al. 2017 (12) | Cross-sectional | Brazil     | Adults aged 18 years and over   | Presence of multimorbidity.<br>Cut-off of 2 conditions     | 21 chronic conditions including: cardiovascular diseases, respiratory conditions, mental disorders, musculoskeletal conditions, metabolic disorders, arthritis/rheumatism, cancer, kidney problem.                                                                                           | State level of education and wealth quintiles. |
| Puth et al. 2017 (80)  | Cross-sectional | Germany    | Adults aged 18 years and older  | Presence of multimorbidity<br>Cut-off of 2 conditions      | 15 chronic diseases: hypertension, coronary heart disease, myocardial infarction, chronic heart failure, stroke, diabetes mellitus, bronchial asthma, any type of cancer, hypercholesterolemia, chronic bronchitis, chronic liver disease, arthrosis, osteoporosis, arthritis and depression | Level of education                             |
| Congdon, 2016 (92)     | Cross-sectional | London, UK | Adults aged between 65-75 years | Presence of multimorbidity.<br>Cut-off of 2 conditions     | A list of 15 chronic conditions were assessed: cardiovascular diseases, diabetes, asthma, chronic obstructive pulmonary disease, dementia, depression, serious mental illness (psychosis or bipolar disorder), cancer, and chronic kidney disease.                                           | Area-level socioeconomic deprivation           |

1  
2  
3  
4  
5  
6  
7  
8  
9  
10  
11  
12  
13  
14  
15  
16  
17  
18  
19  
20  
21  
22  
23  
24  
25  
26  
27  
28  
29  
30  
31  
32  
33  
34  
35  
36  
37  
38  
39  
40  
41  
42  
43  
44  
45  
46



| Study                        | Study design    | Location                               | Population focus            | Assessment of multimorbidity (Presence/Nature/Extent/Both)                                                   | List of chronic conditions                                                                                                                                                                                        | Measure of Socioeconomic disadvantage        |
|------------------------------|-----------------|----------------------------------------|-----------------------------|--------------------------------------------------------------------------------------------------------------|-------------------------------------------------------------------------------------------------------------------------------------------------------------------------------------------------------------------|----------------------------------------------|
| Garin et al. 2016 (42)       | Cross-sectional | 9 low to upper middle-income countries | Adults aged 50 years of age | Presence of multimorbidity.<br>Cut-off of 2 conditions                                                       | 9 conditions explored: arthritis, asthma, cataract, chronic obstructive pulmonary disease (COPD), depression, diabetes, edentulism, hypertension, cognitive impairment, obesity, and stroke.                      | Household income, education                  |
| Jackson et al. 2016 (9)      | Longitudinal    | Australia                              | Women aged 45 to 50 years   | Multimorbidity patterns (psychosomatic, musculoskeletal, cardiometabolic, cancer and respiratory syndromes). | 23 conditions examined including cardiovascular diseases, musculoskeletal conditions, respiratory diseases, cancer, allergies, mental conditions, diabetes, impaired glucose tolerance, chronic fatigue syndrome. | Education, occupation and income management. |
| Tomasdottir et al. 2016 (72) | Longitudinal    | Norway                                 | Adults aged 20-59 years     | Presence of multimorbidity.<br>Cut-off of 2 conditions                                                       | 17 chronic conditions                                                                                                                                                                                             | Financial hardship (worries)                 |
| Afshar et al. 2015 (33)      | Cross-sectional | 28 Low to middle-income countries      | Adults aged 18 and over     | Presence of multimorbidity.<br>Cut-off of 2 conditions                                                       | Seven chronic conditions including: arthritis, angina pectoris, asthma, depression, schizophrenia or psychosis and diabetes.                                                                                      | Level of education.                          |

| Study                            | Study design    | Location | Population focus                  | Assessment of multimorbidity (Presence/Nature/Extent/Both)              | List of chronic conditions                                                                                                                                                                         | Measure of Socioeconomic disadvantage                                             |
|----------------------------------|-----------------|----------|-----------------------------------|-------------------------------------------------------------------------|----------------------------------------------------------------------------------------------------------------------------------------------------------------------------------------------------|-----------------------------------------------------------------------------------|
| Chung et al. 2015 (37)           | Cross-sectional | China    | Adults aged 15 years and older    | Presence and extent of multimorbidity.<br>Cut-off of 2 conditions       | List not provided                                                                                                                                                                                  | Household income, educational attainment, employment status and type of housing.  |
| Diaz et al. 2015 (93)            | Cross-sectional | Norway   | Immigrants aged 15 years and over | Presence of multimorbidity.<br>Cut-off of 2 conditions                  | List not provided                                                                                                                                                                                  | Personal income level. Reason for migration.                                      |
| Prazeres and Santiago, 2015 (94) | Cross-sectional | Portugal | Adults aged 18 years and older    | Extent and presence of multimorbidity.<br>Cut-off of 2 and 3 conditions | List not provided                                                                                                                                                                                  | Years of educations, professional status and self-perceived Socioeconomic status. |
| Roberts et al. 2015 (95)         | Cross-sectional | Canada   | Adults aged 20 years and older    | Presence and extent of multimorbidity<br>Cut-off of 2 or 3 conditions   | A list of 9 conditions including arthritis, mood disorder and/or anxiety, asthma, diabetes mellitus, heart disease, chronic obstructive pulmonary disease, cancer, stroke, and Alzheimer's disease | Educational level and household income                                            |

| Study                    | Study design    | Location | Population focus                                      | Assessment of multimorbidity (Presence/Nature/Extent/Both)                                                                                   | List of chronic conditions                                                                                                                                                                                                                                                                    | Measure of Socioeconomic disadvantage                                                         |
|--------------------------|-----------------|----------|-------------------------------------------------------|----------------------------------------------------------------------------------------------------------------------------------------------|-----------------------------------------------------------------------------------------------------------------------------------------------------------------------------------------------------------------------------------------------------------------------------------------------|-----------------------------------------------------------------------------------------------|
| Banjare et al. 2014 (36) | Cross-sectional | India    | Adults aged over 60 years                             | Extent of multimorbidity (no morbidity, one morbidity, two morbidities and three or more morbidities)                                        | 23 chronic conditions were assessed: musculoskeletal conditions, cardiovascular disease, respiratory conditions, neurological disorders, severe dental conditions, kidney or renal disorders, depression, liver or gall bladder illness, accidental injury, injury due to fall, skin disease. | Education, state of economic independence, quintiles of wealth, living arrangement and caste. |
| Habib et al. 2014 (43)   | Cross-sectional | Lebanon  | Palestinian refugees aged between 14 and 87 years old | Presence and extent of multimorbidity.<br>Cut-off of 2 conditions                                                                            | List not provided                                                                                                                                                                                                                                                                             | Educational attainment, wealth index.                                                         |
| McLean et al. 2014 (77)  | Cross-sectional | Scotland | Adults aged 25 years and over                         | Presence and pattern of multimorbidity (physical only, mental only and mixed physical and mental multimorbidity).<br>Cut-off of 2 conditions | A list of 35 physical and 8 mental conditions were included but not specified on the paper.                                                                                                                                                                                                   | Area-based deprivation.                                                                       |
| Violan et al. 2014 (96)  | Cross-sectional | Spain    | Adults aged 19                                        | Presence of multimorbidity.                                                                                                                  | 31 chronic conditions                                                                                                                                                                                                                                                                         | Area-level of deprivation                                                                     |

| Study                       | Study design    | Location     | Population focus            | Assessment of multimorbidity (Presence/Nature/Extent/Both)        | List of chronic conditions                                                                                                                   | Measure of Socioeconomic disadvantage                                                                                                           |
|-----------------------------|-----------------|--------------|-----------------------------|-------------------------------------------------------------------|----------------------------------------------------------------------------------------------------------------------------------------------|-------------------------------------------------------------------------------------------------------------------------------------------------|
|                             |                 |              | years and older             | Cut-off of 2 conditions                                           |                                                                                                                                              |                                                                                                                                                 |
| Alaba et al. 2013 (50)      | Cross-sectional | South Africa | Adults aged 18 and over     | Presence or absence of multimorbidity.<br>Cut-off of 2            | Eight chronic conditions were assessed including tuberculosis, high blood pressure, diabetes or high blood sugar, stroke, asthma and cancer. | Years of schooling, household income, social assistance, employment.                                                                            |
| Cornish et al. 2013 (53)    | Longitudinal    | Bristol, UK  | Children aged 0 to 18 years | Presence and extent of multimorbidity.<br>Cut-off of 2 conditions | As listed in the Johns Hopkins University Adjusted Clinical Groups (ACG) System                                                              | Parent's educational level. Occupational social class. Housing tenure. Family adversity index during pregnancy. Area socioeconomic deprivation. |
| Demirchyan et al. 2013 (41) | Longitudinal    | Armenia      | Adults aged 37 to 90 years  | Presence of multimorbidity.<br>Cut-off of 2 conditions            | List not provided                                                                                                                            | Education, perceived low affordability of healthcare services and perceived living standards.                                                   |

| Study                         | Study design    | Location     | Population focus               | Assessment of multimorbidity (Presence/Nature/Extent/Both)                                                                                                          | List of chronic conditions                                                                                                                                                                                | Measure of Socioeconomic disadvantage                         |
|-------------------------------|-----------------|--------------|--------------------------------|---------------------------------------------------------------------------------------------------------------------------------------------------------------------|-----------------------------------------------------------------------------------------------------------------------------------------------------------------------------------------------------------|---------------------------------------------------------------|
| Weiman et al. 2016 (48)       | Cross-sectional | South Africa | People aged 15 years and older | Presence of multimorbidity.<br>Cut-off of 2 conditions                                                                                                              | List not provided                                                                                                                                                                                         | Multidimensional poverty index                                |
| Agborsangaya et al. 2012 (85) | Cross-sectional | Canada       | Adults aged 18 and over        | Presence of multimorbidity.<br>Cut-off of 2 conditions                                                                                                              | >16 chronic conditions explored, including diabetes, respiratory conditions, cardiovascular diseases, depression or anxiety, chronic pain, arthritis, gastrointestinal tract disease and kidney diseases. | Educational level and annual household income.                |
| Barnett et al. 2012 (52)      | Cross-sectional | UK           | Individuals from all ages      | Presence of multimorbidity<br>Cut-off of 2 conditions                                                                                                               | 40 chronic conditions                                                                                                                                                                                     | Area level deprivation                                        |
| Schäfer et al. 2012 (69)      | Longitudinal    | Germany      | Adults aged 65 years and older | Presence and patterns of multimorbidity (cardiometabolic disorders (CMD) and anxiety, depression, somatoform disorders and pain (ADS/P))<br>Cut-off of 3 conditions | 29 chronic conditions                                                                                                                                                                                     | Education, autonomy on former occupation and household income |

| Study                          | Study design | Location      | Population focus              | Assessment of multimorbidity (Presence/Nature/Extent/Both)            | List of chronic conditions                                                                      | Measure of Socioeconomic disadvantage                                                                                                                |
|--------------------------------|--------------|---------------|-------------------------------|-----------------------------------------------------------------------|-------------------------------------------------------------------------------------------------|------------------------------------------------------------------------------------------------------------------------------------------------------|
| Tucker-Seeley et al. 2011 (73) | Longitudinal | United States | Adults aged 50 years and over | Presence and extent of multimorbidity.<br>Count of chronic conditions | Six chronic conditions: cancer, heart disease, lung disease, stroke, diabetes, and hypertension | Childhood financial hardship (yes/no). Average lifetime earnings during young and middle adulthood. Educational attainment as indicator of adult SES |

1  
2  
3  
4  
5  
6  
7  
8  
9  
10  
11  
12  
13  
14  
15  
16  
17  
18  
19  
20  
21  
22  
23  
24  
25  
26  
27  
28  
29  
30  
31  
32  
33  
34  
35  
36  
37  
38  
39  
40  
41  
42  
43  
44  
45  
46

For peer review only

Table 3. Types of theories and context of application

| Study*                                      | Theoretical application | Materialist | Behavioural | Psychosocial | Social capital | Life course | Neo-liberal |
|---------------------------------------------|-------------------------|-------------|-------------|--------------|----------------|-------------|-------------|
| Vidyashree et al 2021 <sup>b</sup>          |                         | ✓           |             |              | ✓              |             |             |
| Singh 2021 <sup>a</sup>                     | Theory tested           | ✓           | ✓           | ✓            | ✓              |             |             |
| Hone et al. 2021 <sup>b</sup>               |                         | ✓           | ✓           | ✓            |                |             |             |
| Hernandez et al. 2021 <sup>b</sup>          |                         |             |             |              |                |             | ✓           |
| Khanolkar et al. 2021 <sup>a</sup>          |                         |             |             |              |                | ✓           |             |
| Craig et al. 2021 <sup>a</sup>              |                         | ✓           | ✓           |              |                |             |             |
| Andersen 2021 <sup>b</sup>                  |                         |             | ✓           |              |                |             |             |
| Zhao et al. 2020 <sup>b</sup>               |                         | ✓           |             |              |                |             |             |
| Yidiz et al. 2020 <sup>a,b</sup>            |                         | ✓           |             | ✓            | ✓              |             |             |
| Wister et al. 2020 <sup>a,b</sup>           |                         | ✓           | ✓           | ✓            |                |             |             |
| Vinjerui 2020 <sup>a,b</sup>                |                         | ✓           |             | ✓            | ✓              |             |             |
| Chamberlain 2020 <sup>b</sup>               |                         | ✓           |             |              |                |             |             |
| Odland et al. 2020 <sup>b</sup>             |                         | ✓           |             |              |                |             |             |
| Pati et al. 2020 <sup>b</sup>               |                         | ✓           | ✓           |              |                |             |             |
| Russell et al 2019 <sup>b</sup>             |                         |             |             |              |                | ✓           |             |
| Seo 2019 <sup>b</sup>                       |                         | ✓           | ✓           |              |                |             |             |
| Johnston et al. 2019 <sup>a</sup>           | Theory tested           |             |             |              |                | ✓           |             |
| Calderon-Larrañaga et al. 2018 <sup>a</sup> |                         |             |             | ✓            |                |             |             |

| Study*                                  | Theoretical application | Materialist | Behavioural | Psychosocial | Social capital | Life course | Neo-liberal |
|-----------------------------------------|-------------------------|-------------|-------------|--------------|----------------|-------------|-------------|
| Mondor et al. 2018 <sup>a</sup>         | Theory tested           |             | ✓           |              |                |             |             |
| Alimohammadian et al. 2017 <sup>a</sup> |                         |             | ✓           |              |                |             |             |
| Katikireddi et al. 2017 <sup>a</sup>    | Theory tested           |             | ✓           |              |                | ✓           |             |
| Tomasdottir et al. 2016 <sup>a</sup>    |                         |             |             | ✓            |                |             |             |
| Chung et al. 2015 <sup>a</sup>          | Theory tested           | ✓           | ✓           |              |                |             |             |
| Barnett 2012 <sup>b</sup>               |                         |             | ✓           |              |                |             |             |
| Agborsangaya et al. 2012 <sup>a</sup>   |                         |             |             | ✓            |                |             |             |
| Tucker-Seeley et al. 2011 <sup>a</sup>  |                         | ✓           |             |              |                | ✓           |             |
| Costa et al. 2018 <sup>b</sup>          |                         |             | ✓           |              |                |             |             |
| Canizares et al. 2017 <sup>b</sup>      |                         |             | ✓           |              |                |             |             |
| Puth et al. 2017 <sup>b</sup>           |                         |             | ✓           |              |                |             |             |
| Afshar et al. 2015 <sup>b</sup>         |                         |             | ✓           | ✓            |                |             |             |
| Banjare et al. 2014 <sup>b</sup>        |                         |             | ✓           |              |                |             |             |
| Alaba et al. 2013 <sup>b</sup>          |                         |             | ✓           | ✓            | ✓              |             |             |
| Demirchyan et al. 2013 <sup>b</sup>     |                         | ✓           | ✓           | ✓            |                |             |             |

Notes: \* Restricted to studies with identified use of theories.

<sup>a</sup> Specific theory was explicitly mentioned by the authors

<sup>b</sup> Theory was identified and inferred by the reviewers

<sup>ab</sup> One or more theories were explicitly mentioned but one or more identified and inferred by the reviewers



PRISMA flow diagram

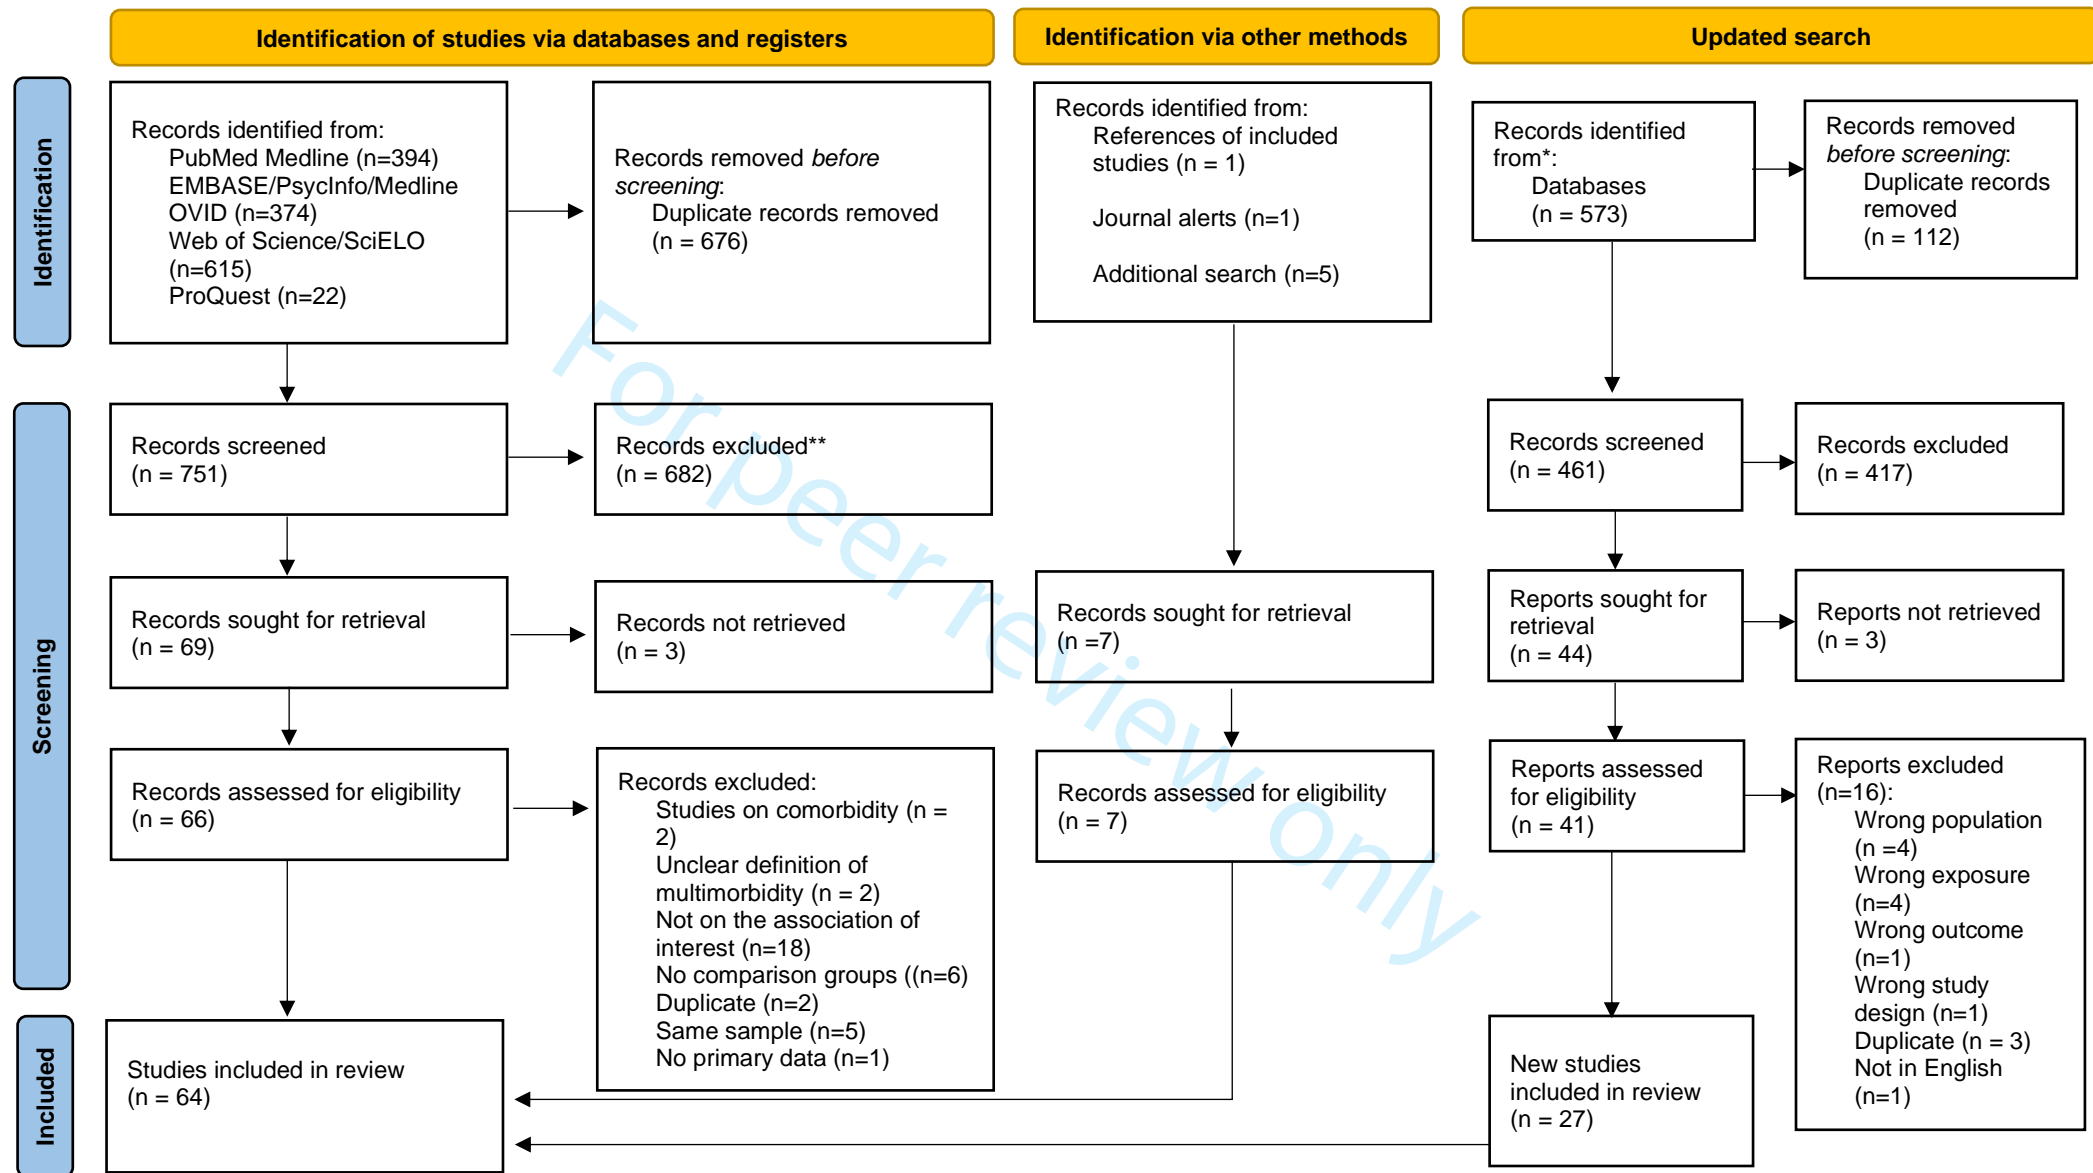

## Appendices

### Contents

|                                                                             |    |
|-----------------------------------------------------------------------------|----|
| Appendix 1. Detailed search strategy according to electronic databases..... | 2  |
| MEDLINE.....                                                                | 2  |
| WEB OF SCIENCE.....                                                         | 6  |
| PUBMED.....                                                                 | 8  |
| Appendix 2. Reasons for exclusion of studies after full-text review .....   | 11 |
| References.....                                                             | 12 |

For peer review only

## Appendix 1. Detailed search strategy according to electronic databases

### MEDLINE

| Outcome                                                                                                    | Exposure                                                                                                                                                                                                                                                                                                                                                                                                                                                                                                                                                      | Phenomenon                                                                                                                                                                                                                                                                                                                                                                                                                             |
|------------------------------------------------------------------------------------------------------------|---------------------------------------------------------------------------------------------------------------------------------------------------------------------------------------------------------------------------------------------------------------------------------------------------------------------------------------------------------------------------------------------------------------------------------------------------------------------------------------------------------------------------------------------------------------|----------------------------------------------------------------------------------------------------------------------------------------------------------------------------------------------------------------------------------------------------------------------------------------------------------------------------------------------------------------------------------------------------------------------------------------|
| (multimorb\$ or multi?morb\$<br>or<br>multiple chronic conditions\$ or<br>multiple chronic diseases\$).ti. | Psychosocial Deprivation* .ti. OR<br>OR<br>exp Family characteristics/ OR<br>exp Hierarchy, Social/ OR<br>Social Hierarch* .ti. OR<br>Minority Group* .ti. OR<br>exp Social Class/ OR<br>Social class* .ti. OR<br>Social Mobilit* .ti. OR<br>Caste* .ti. OR<br>Social Condition* .ti. OR<br>exp Sociology/ OR<br>Poverty .ti. OR<br>exp Socioeconomic Factors/ OR<br>Socioeconomic* .ti. OR<br>Salary .ti. OR<br>Salaries .ti. OR<br>Income* .ti. OR<br>Wage* .ti. OR<br>Remuneration* .ti. OR<br>Occupation* .ti. OR<br>Unemploy* .ti. OR<br>Labour* .ti. OR | Inequalit*.ab. OR<br>Unequal*.ab. OR<br>Disparit* .ab. OR<br>Inequit* .ab. OR<br>Difference* .ab. OR<br>Different*.ab. OR<br>Discriminat* .ab. OR<br>Marginali*.ab OR<br>Marginali*.ti OR<br>Depriv* .ab. OR<br>Inequalit*.ti. OR<br>Disparit* .ti. OR<br>Inequit* .ti. OR<br>Difference* .ti. OR<br>Discriminat* .ti. OR<br>Depriv* .ti. OR<br>Disadvantage*.ti. OR<br>Disadvantage*.ab.<br>OR<br>Vulnerab*.ab<br>OR<br>Vulnerab*.ti. |

1  
2  
3  
4  
5  
6  
7  
8  
9  
10  
11  
12  
13  
14  
15  
16  
17  
18  
19  
20  
21  
22  
23  
24  
25  
26  
27  
28  
29  
30  
31  
32  
33  
34  
35  
36  
37  
38  
39  
40  
41  
42  
43  
44  
45  
46  
47  
48  
49  
50  
51  
52  
53  
54  
55  
56  
57  
58  
59  
60

|  |                                                                                                                                                                                                                                                                                                                                                                                                                                                                                                                                                                                                                                                                                                                                     |  |
|--|-------------------------------------------------------------------------------------------------------------------------------------------------------------------------------------------------------------------------------------------------------------------------------------------------------------------------------------------------------------------------------------------------------------------------------------------------------------------------------------------------------------------------------------------------------------------------------------------------------------------------------------------------------------------------------------------------------------------------------------|--|
|  | <p>Labor* .ti. OR</p> <p>Employment* .ti OR</p> <p>Employment* .ab OR</p> <p>Educational Status.ti. OR</p> <p>Educational Achievement*.ti.<br/>OR</p> <p>Educational level*.ti OR</p> <p>Educational level*.ab OR</p> <p>Educational attainment .ti OR</p> <p>Educational attainment .ab OR</p> <p>exp Ethnic Groups/ OR</p> <p>Ethnic* .ti. OR</p> <p>Race* .ti. OR</p> <p>Raci* .ti. OR</p> <p>exp Sexism/ OR</p> <p>Sexis* .ti. OR</p> <p>exp Gender Identity/ OR</p> <p>Gender* .ti. OR</p> <p>Social Capital* .ti. OR</p> <p>Neomaterial* .ti.<br/>OR</p> <p>Social Cohesi* .ti. OR</p> <p>Maternalis* .ti. OR</p> <p>Psychosocial Deprivation* .ab.<br/>OR</p> <p>Social Hierarch* .ab. OR</p> <p>Minority Group* .ab. OR</p> |  |
|--|-------------------------------------------------------------------------------------------------------------------------------------------------------------------------------------------------------------------------------------------------------------------------------------------------------------------------------------------------------------------------------------------------------------------------------------------------------------------------------------------------------------------------------------------------------------------------------------------------------------------------------------------------------------------------------------------------------------------------------------|--|

|    |  |                              |
|----|--|------------------------------|
| 1  |  |                              |
| 2  |  |                              |
| 3  |  | Social class* .ab. OR        |
| 4  |  |                              |
| 5  |  | Social Mobilit* .ab. OR      |
| 6  |  |                              |
| 7  |  | Caste* .ab. OR               |
| 8  |  |                              |
| 9  |  |                              |
| 10 |  | Social Condition* .ab. OR    |
| 11 |  |                              |
| 12 |  | Poverty .ab. OR              |
| 13 |  |                              |
| 14 |  | Socioeconomic*.ab. OR        |
| 15 |  |                              |
| 16 |  | Salary .ab. OR               |
| 17 |  |                              |
| 18 |  | Salaries .ab. OR             |
| 19 |  |                              |
| 20 |  | Income* .ab. OR              |
| 21 |  |                              |
| 22 |  | Wage* .ab. OR                |
| 23 |  |                              |
| 24 |  | Remuneration* .ab. OR        |
| 25 |  |                              |
| 26 |  | Occupation* .ab. OR          |
| 27 |  |                              |
| 28 |  | Unemploy* .ab. OR            |
| 29 |  |                              |
| 30 |  | Labour* .ab. OR              |
| 31 |  |                              |
| 32 |  | Labor* .ab. OR               |
| 33 |  |                              |
| 34 |  | Educational Status.ab. OR    |
| 35 |  |                              |
| 36 |  | Educational Achievement*.ab. |
| 37 |  | OR                           |
| 38 |  |                              |
| 39 |  | Ethnic* .ab. OR              |
| 40 |  |                              |
| 41 |  | Race* .ab. OR                |
| 42 |  |                              |
| 43 |  | Raci* .ab. OR                |
| 44 |  |                              |
| 45 |  | Sexis* .ab. OR               |
| 46 |  |                              |
| 47 |  | Gender* .ab. OR              |
| 48 |  |                              |
| 49 |  | Social Capital* .ab. OR      |
| 50 |  |                              |
| 51 |  | Neomaterial* .ab.            |
| 52 |  |                              |
| 53 |  | OR                           |
| 54 |  |                              |
| 55 |  | Social Cohesi* .ab. OR       |
| 56 |  |                              |
| 57 |  |                              |
| 58 |  |                              |
| 59 |  |                              |
| 60 |  |                              |

1  
2  
3  
4  
5  
6  
7  
8  
9  
10  
11  
12  
13  
14  
15  
16  
17  
18  
19  
20  
21  
22  
23  
24  
25  
26  
27  
28  
29  
30  
31  
32  
33  
34  
35  
36  
37  
38  
39  
40  
41  
42  
43  
44  
45  
46  
47  
48  
49  
50  
51  
52  
53  
54  
55  
56  
57  
58  
59  
60

|  |                                          |  |
|--|------------------------------------------|--|
|  | Materialis* .ab. OR<br>Neomaterial* .ab. |  |
|--|------------------------------------------|--|

For peer review only

## WEB OF SCIENCE

| Outcome                                                                                                      | Exposure                                                                                                                                                                                                                                                                                                                                                                                                                                                                                            | Phenomenon                                                                                                                                                                                 |
|--------------------------------------------------------------------------------------------------------------|-----------------------------------------------------------------------------------------------------------------------------------------------------------------------------------------------------------------------------------------------------------------------------------------------------------------------------------------------------------------------------------------------------------------------------------------------------------------------------------------------------|--------------------------------------------------------------------------------------------------------------------------------------------------------------------------------------------|
| TS = (multimorb* OR<br>multi-morb* OR “multiple<br>chronic condition*” OR<br>“multiple chronic<br>disease*”) | TS = (“Psychosocial<br>Deprivation*” OR<br>“Family characteristics” OR<br>“Social Hierarch*” OR<br>“Minority Group*” OR<br>“Social Class” OR<br>“Social Mobilit*” OR<br>Caste* OR<br>“Social Condition*” OR<br>Sociology OR<br>Poverty. OR<br>“Socioeconomic Factors” OR<br>Socioeconomic* OR<br>Salary OR<br>Salaries OR<br>Income* OR<br>Wage* OR<br>Remuneration* OR<br>Occupation* OR<br>Unemploy* OR<br>Labour* OR<br>Labor* OR<br>Employment* OR<br>Employment* OR<br>“Educational Status” OR | TS = ( Inequalit* OR<br>Unequal* OR<br>Disparit* OR<br>Inequit* OR<br>Difference* OR<br>Different* OR<br>Discriminat* OR<br>Marginali* OR<br>Depriv* OR<br>Disadvantage* OR<br>Vulnerab* ) |

1  
2  
3  
4  
5  
6  
7  
8  
9  
10  
11  
12  
13  
14  
15  
16  
17  
18  
19  
20  
21  
22  
23  
24  
25  
26  
27  
28  
29  
30  
31  
32  
33  
34  
35  
36  
37  
38  
39  
40  
41  
42  
43  
44  
45  
46  
47  
48  
49  
50  
51  
52  
53  
54  
55  
56  
57  
58  
59  
60

|  |                                                                                                                                                                                                                                                                                                                                                                                                                          |  |
|--|--------------------------------------------------------------------------------------------------------------------------------------------------------------------------------------------------------------------------------------------------------------------------------------------------------------------------------------------------------------------------------------------------------------------------|--|
|  | <p>“Educational Achievement*” OR</p> <p>“Educational level*” OR</p> <p>“Educational attainment” OR</p> <p>“Ethnic Groups” OR</p> <p>Ethnic* OR</p> <p>Race* OR</p> <p>Raci* OR</p> <p>Sexism OR</p> <p>Sexis* OR</p> <p>“Gender Identity” OR</p> <p>Gender* OR</p> <p>“Social Capital*” OR</p> <p>“Social Cohesi*” OR</p> <p>Maternalis* OR</p> <p>Neomaterial*</p> <p>OR</p> <p>Maternalis* OR</p> <p>Neomaterial*)</p> |  |
|--|--------------------------------------------------------------------------------------------------------------------------------------------------------------------------------------------------------------------------------------------------------------------------------------------------------------------------------------------------------------------------------------------------------------------------|--|



## PUBMED

| Outcome                                                                                                                                                                                      | Exposure                                                                                                                                                                                                                                                                                                                                                                                                                                                                                                                                                                                                    | Phenomenon                                                                                                                                                                                                                                          |
|----------------------------------------------------------------------------------------------------------------------------------------------------------------------------------------------|-------------------------------------------------------------------------------------------------------------------------------------------------------------------------------------------------------------------------------------------------------------------------------------------------------------------------------------------------------------------------------------------------------------------------------------------------------------------------------------------------------------------------------------------------------------------------------------------------------------|-----------------------------------------------------------------------------------------------------------------------------------------------------------------------------------------------------------------------------------------------------|
| multimorb*[TIAB] OR<br>multimorbidity[MH] OR<br>multi-morb*[TIAB] OR<br>multiple chronic<br>condition*[TIAB] OR<br>multiple chronic<br>disease*[TIAB] OR<br>multiple chronic disease<br>[MH] | Psychosocial<br>Deprivation*[TIAB] OR<br>Family characteristics [TIAB]<br>OR<br>Social Hierarch*[TIAB] OR<br>Minority Group*[TIAB] OR<br>Social Class[TIAB] OR<br>Social Mobilit*[TIAB] OR<br>Caste*[TIAB] OR<br>Social Condition*[TIAB] OR<br>Sociology[TIAB] OR<br>Poverty [TIAB] OR<br>Socioeconomic Factors[TIAB]<br>OR<br>Socioeconomic*[TIAB] OR<br>Salary[TIAB] OR<br>Salaries[TIAB] OR<br>Income*[TIAB] OR<br>Wage*[TIAB] OR<br>Remuneration*[TIAB] OR<br>Occupation*[TIAB] OR<br>Unemploy*[TIAB] OR<br>Labour*[TIAB] OR<br>Labor*[TIAB] OR<br>Employment*[TIAB] OR<br>Educational Status [TIAB] OR | Inequalit*[TIAB] OR<br>Unequal*[TIAB] OR<br>Disparit*[TIAB] OR<br>Inequit*[TIAB] OR<br>Difference*[TIAB] OR<br>Different*[TIAB] OR<br>Discriminat*[TIAB] OR<br>Marginali*[TIAB] OR<br>Depriv*[TIAB] OR<br>Disadvantage*[TIAB] OR<br>Vulnerab*[TIAB] |

|    |  |                               |
|----|--|-------------------------------|
| 1  |  |                               |
| 2  |  |                               |
| 3  |  |                               |
| 4  |  | Educational                   |
| 5  |  | Achievement*[TIAB] OR         |
| 6  |  |                               |
| 7  |  | Educational level*[TIAB] OR   |
| 8  |  |                               |
| 9  |  | Educational attainment [TIAB] |
| 10 |  | OR                            |
| 11 |  |                               |
| 12 |  | Ethnic Groups[TIAB] OR        |
| 13 |  |                               |
| 14 |  | Ethnic*[TIAB] OR              |
| 15 |  |                               |
| 16 |  | Race*[TIAB] OR                |
| 17 |  |                               |
| 18 |  | Raci*[TIAB] OR                |
| 19 |  |                               |
| 20 |  | Sexism[TIAB] OR               |
| 21 |  |                               |
| 22 |  | Sexis*[TIAB] OR               |
| 23 |  |                               |
| 24 |  | “Gender Identity”[TIAB] OR    |
| 25 |  |                               |
| 26 |  | Gender*[TIAB] OR              |
| 27 |  |                               |
| 28 |  | Social Capital*[TIAB] OR      |
| 29 |  |                               |
| 30 |  | Social Cohesi*[TIAB] OR       |
| 31 |  |                               |
| 32 |  | Maternalis*[TIAB] OR          |
| 33 |  |                               |
| 34 |  | Neomaterial*[TIAB]            |
| 35 |  |                               |
| 36 |  | OR                            |
| 37 |  |                               |
| 38 |  | Maternalis*[TIAB] OR          |
| 39 |  |                               |
| 40 |  | Neomaterial*[TIAB]            |
| 41 |  |                               |
| 42 |  |                               |
| 43 |  |                               |
| 44 |  |                               |
| 45 |  |                               |
| 46 |  |                               |

**PROQUEST** (Applied Social Sciences/ERIC/Humanities Index/ProQuest Central/ProQuest dissertation and Thesis Global/Sociological Abstracts)

multimorb\* OR multi-morb\* OR “multiple chronic condition\*” OR “multiple chronic diseases\*”

AND

“Psychosocial Deprivation\*” OR “Family characteristics” OR “Social Hierarch\*” OR “Minority Group\*” OR “Social Class” OR “Social Mobilit\*” OR Caste\* OR “Social Condition\*” OR Sociology OR Poverty. OR “Socioeconomic Factors” OR Socioeconomic\* OR Salary OR Salaries OR Income\* OR Wage\* OR Remuneration\* OR Occupation\* OR

1  
2  
3 Unemploy\* OR Labour\* OR Labor\* OR Employment\* OR Employment\* OR “Educational  
4 Status” OR “Educational Achievement\*” OR “Educational level\*” OR “Educational  
5 attainment” OR “Ethnic Groups” OR Ethnic\* OR Race\* OR Raci\* OR Sexism OR Saxis\*  
6 OR “Gender Identity” OR Gender\* OR “Social Capital\*” OR “Social Cohesi\*” OR  
7 Materialis\* OR Neomaterial\* OR Materalis\* OR Neomaterial\*  
8  
9

10 AND  
11

12 Inequalit\* OR Unequal\* OR Disparit\* OR Inequit\* OR Difference\* OR Different\* OR  
13 Discriminat\* OR Marginali\* OR Depriv\* OR Disadvantage\* ORVulnerab\*  
14  
15  
16  
17  
18  
19  
20  
21  
22  
23  
24  
25  
26  
27  
28  
29  
30  
31  
32  
33  
34  
35  
36  
37  
38  
39  
40  
41  
42  
43  
44  
45  
46  
47  
48  
49  
50  
51  
52  
53  
54  
55  
56  
57  
58  
59  
60

## Appendix 2. Reasons for exclusion of studies after full-text review

**Comorbidity** Barnett, Mercer (1), Gallacher, McQueenie (2), Alonso-Moran, Orueta (3)

**Unclear definition of multimorbidity** Chau, Baumann (4), Reis-Santos, Gomes (5)

**Did not explore the association between socioeconomic disadvantage and multimorbidity** Charlton, Rudisill (6), Galenkamp, Gagliardi (7), Golinowska, Sowa (8), Jessen, Pallesen (9), Koroukian, Schiltz (10), Mujica-Mota, Roberts (11), Orueta, Garcia-Alvarez (12), Phaswana-Mafuya, Peltzer (13), Rodrigues, Gregorio (14), Thavorn, Maxwell (15), Tran, Kiran (16), van den Akker, Buntinx (17), Wang, Wang (18), Ward (19), Woo and Leung (20), Cassell, Edwards (21), Brinda, Attermann (22), Kone, Mondor (23)

**Absence of comparative group** Eakin, Bull (24), Frakes, Brownie (25), Kangovi, Mitra (26), Leiser, Deruaz-Luyetl (27), Smith, Ferede (28), von dem Knesebeck, Bickel (29)

**Full-text unavailable** Jantz (30), Pati and Swain (31), Russel, Grant (32), Cezard, Keenan (33), Zou, Wang (34)

**Duplicate** Myung, Yo Han (35), Srinivasa Vittal, Skivington (36), Aminisani, Stephens (37), Chamberlain, Rutten (38), Pati, Swain (39)

**Use of the same sample** Ahmadi, Alimohammadian (40), Ataguba (41), Kunna, Miguel San (42), Nunes, Thume (43), Habib, Mikati (44)

**No primary data** Shadmi (45)

**Not in English** Melo and Lima (46)

**Not peer-reviewed** Korea National Health & Nutrition Survey (47)

**Wrong exposure** Basham (48), Douglas, Vinjerui (49), Guimaraes and Andrade (50), Harrison, Britt (51)

**Wrong outcome** Kivimaki, Batty (52)

**Wrong population** Calderon-Larranaga, Marengoni (53), Carrilero, Dalmau-Bueno (54), Shang, Peng (55), Vinjerui, Boeckxstaens (56)

## References

1. Barnett K, Mercer SW, Norbury M, Watt G, Wyke S, Guthrie B. Epidemiology of multimorbidity and implications for health care, research, and medical education: a cross-sectional study. *Lancet (London, England)*. 2012;380(9836):37-43.
2. Gallacher KI, McQueenie R, Nicholl B, Jani BD, Lee D, Mair FS. Risk factors and mortality associated with multimorbidity in people with stroke or transient ischaemic attack: a study of 8,751 UK Biobank participants. *Journal of comorbidity*. 2018;8(1):1-8.
3. Alonso-Moran E, Orueta JF, Fraile Esteban JI, Arteagoitia Axpe JM, Luz Marques Gonzalez M, Toro Polanco N, et al. Multimorbidity in people with type 2 diabetes in the Basque Country (Spain): Prevalence, comorbidity clusters and comparison with other chronic patients. *European Journal of Internal Medicine*. 2015;26(3):197-202.
4. Chau K, Baumann M, Chau N. Socioeconomic inequities patterns of multi-morbidity in early adolescence. *International journal for equity in health*. 2013;12:65.
5. Reis-Santos B, Gomes T, Macedo LR, Horta BL, Riley LW, Maciel EL. Prevalence and patterns of multimorbidity among tuberculosis patients in Brazil: a cross-sectional study. *International journal for equity in health*. 2013;12:61.
6. Charlton J, Rudisill C, Bhattarai N, Gulliford M. Impact of deprivation on occurrence, outcomes and health care costs of people with multiple morbidity. *Journal of Health Services Research & Policy*. 2013;18(4):215-23.
7. Galenkamp H, Gagliardi C, Principi A, Golinowska S, Moreira A, Schmidt AE, et al. Predictors of social leisure activities in older Europeans with and without multimorbidity. *European Journal of Ageing*. 2016;13(2):129-43.
8. Golinowska S, Sowa A, Deeg D, Socci M, Principi A, Rodrigues R, et al. Participation in formal learning activities of older Europeans in poor and good health. *Eur J Ageing*. 2016;13:115-27.
9. Jessen MAB, Pallesen AVJ, Kriegbaum M, Kristiansen M. The association between loneliness and health - a survey-based study among middle-aged and older adults in Denmark. *Ageing & mental health*. 2017:1-6.
10. Koroukian SM, Schiltz NK, Warner DF, Given CW, Schluchter M, Owusu C, et al. Social determinants, multimorbidity, and patterns of end-of-life care in older adults dying from cancer. *Journal of Geriatric Oncology*. 2017;8(2):117-24.
11. Mujica-Mota RE, Roberts M, Abel G, Elliott M, Lyratzopoulos G, Roland M, et al. Common patterns of morbidity and multi-morbidity and their impact on health-related quality of life: evidence from a national survey. *Quality of life research : an international journal of quality of life aspects of treatment, care and rehabilitation*. 2015;24(4):909-18.
12. Orueta JF, Garcia-Alvarez A, Garcia-Goni M, Paolucci F, Nuno-Solinis R. Prevalence and costs of multimorbidity by deprivation levels in the basque country: a population based study using health administrative databases. *PLoS One*. 2014;9(2):e89787.
13. Phaswana-Mafuya N, Peltzer K, Chirinda W, Musekiwa A, Kose Z, Hoosain E, et al. Self-reported prevalence of chronic non-communicable diseases and associated factors among older adults in South Africa. *Glob Health Action*. 2013;6:20936.
14. Rodrigues AM, Gregorio MJ, Sousa RD, Dias SS, Santos MJ, Mendes JM, et al. Challenges of Ageing in Portugal: Data from the EpiDoC Cohort. *Acta medica portuguesa*. 2018;31(2):80-93.
15. Thavorn K, Maxwell CJ, Gruneir A, Bronskill SE, Bai Y, Kone Pefoyo AJ, et al. Effect of socio-demographic factors on the association between multimorbidity and healthcare costs: a population-based, retrospective cohort study. *BMJ open*. 2017;7(10):e017264.
16. Tran J, Kiran A, Rahimi K. Prevalence of multimorbidity of cardio-metabolic disease in the United Kingdom. *European Heart Journal*. 2016;37 (Supplement 1):742.
17. van den Akker M, Buntinx F, Metsemakers JF, Knottnerus J. Marginal impact of psychosocial factors on multimorbidity: Results of an explorative nested case-control study. *Social Science & Medicine*. 2000;50(11):1679-93.
18. Wang HH, Wang JJ, Lawson KD, Wong SY, Wong MC, Li FJ, et al. Relationships of multimorbidity and income with hospital admissions in 3 health care systems. *Annals of family medicine*. 2015;13(2):164-7.

19. Ward BW. Multiple chronic conditions and labor force outcomes: A population study of U.S. adults. *American journal of industrial medicine*. 2015;58(9):943-54.
20. Woo J, Leung J. Multi-morbidity, dependency, and frailty singly or in combination have different impact on health outcomes. *Age (Dordrecht, Netherlands)*. 2014;36(2):923-31.
21. Cassell A, Edwards D, Harshfield A, Rhodes K, Brimicombe J, Payne R, et al. The epidemiology of multimorbidity in primary care: A retrospective cohort study. *British Journal of General Practice*. 2018;68(669):e245-e51.
22. Brinda EM, Attermann J, Gerdtham UG, Enemark U. Socio-economic inequalities in health and health service use among older adults in India: results from the WHO Study on Global AGEing and adult health survey. *Public health*. 2016;141:32-41.
23. Kone AP, Mondor L, Maxwell C, Kabir US, Rosella LC, Wodchis WP. Rising burden of multimorbidity and related socio-demographic factors: a repeated cross-sectional study of Ontarians. *Canadian journal of public health = Revue canadienne de sante publique*. 2021;112(4):737-47.
24. Eakin EG, Bull SS, Riley KM, Reeves MM, McLaughlin P, Gutierrez S. Resources for health: A primary-care-based diet and physical activity intervention targeting urban Latinos with multiple chronic conditions. *Health Psychology*. 2007;26(4):392-400.
25. Frakes KA, Brownie S, Davies L, Thomas J, Miller ME, Tyack Z. The sociodemographic and health-related characteristics of a regional population with chronic disease at an interprofessional student-assisted clinic in Queensland Capricornia Allied Health Partnership. *The Australian journal of rural health*. 2013;21(2):97-104.
26. Kangovi S, Mitra N, Grande D, Huo H, Smith RA, Long JA. Community Health Worker Support for Disadvantaged Patients With Multiple Chronic Diseases: A Randomized Clinical Trial. *American journal of public health*. 2017;107(10):1660-7.
27. Leiser S, Deruaz-Luyetl A, N'Goran AA, Pasquier J, Streit S, Neuner-Jehle S, et al. Determinants associated with deprivation in multimorbid patients in primary care-A cross-sectional study in Switzerland. *Plos One*. 2017;12(7).
28. Smith SM, Ferede A, O'Dowd T. Multimorbidity in younger deprived patients: an exploratory study of research and service implications in general practice. *BMC Fam Pract*. 2008;9:6.
29. von dem Knesebeck O, Bickel H, Fuchs A, Gensichen J, Hoefels S, Riedel-Heller SG, et al. Social inequalities in patient-reported outcomes among older multimorbid patients - results of the MultiCare cohort study. *International journal for equity in health*. 2015;14.
30. Jantz I. Multimorbidity at midlife: An analysis of morbidity patterns and life course socioeconomic cofactors. *Dissertation Abstracts International Section A: Humanities and Social Sciences*. 2017;78(5-A(E)):No Pagination Specified.
31. Pati S, Swain S. Prevalence, pattern and correlates of multimorbidity among primary care patients in India. *Tropical Medicine and International Health*. 2015;1(1):250.
32. Russel J, Grant C, Morton S. Cumulative socioeconomic disadvantage increases the risk of multi-morbidity in early childhood. *Journal of Paediatrics and Child Health*. 2017;53(S3):5.
33. Cezard G, Keenan K, Sullivan F. Socioeconomic disparities in the development of multimorbidity in Scotland: The Benefits of Applying a Life Course longitudinal approach. *JOURNAL OF EPIDEMIOLOGY AND COMMUNITY HEALTH*. 2020;74:A60-A.
34. Zou S, Wang Z, Bhura M, Zhang G, Tang K. Prevalence and associated socioeconomic factors of multimorbidity in ten regions of China: a cross-sectional analysis. *The Lancet*. 2020;396(Supplement 1):S12.
35. Myung K, Yo Han L, Yong-Soo K, Shin J-Y, Lim J, Nazroo J. Socioeconomic inequalities in health in the context of multimorbidity: A Korean panel study. *PLoS One*. 2017;12(3).
36. Srinivasa Vittal K, Skivington K, Leyland AH, Hunt K, Mercer SW. The contribution of risk factors to socioeconomic inequalities in multimorbidity across the lifecourse: a longitudinal analysis of the Twenty-07 cohort. *BMC medicine*. 2017;15.
37. Aminisani N, Stephens C, Allen J, Alpass F, Shamshirgaran SM. Socio-demographic and lifestyle factors associated with multimorbidity in New Zealand. *EPIDEMIOLOGY AND HEALTH*. 2019;42.
38. Chamberlain AM, Rutten LJJ, Wilson PM, Fan C, Boyd CM, Jacobson DJ, et al. Neighborhood socioeconomic disadvantage is associated with multimorbidity in a geographically-defined community (vol 20, 13, 2020). *BMC PUBLIC HEALTH*. 2020;20(1).



- 1  
2  
3 39. Pati S, Swain S, Knottnerus JA, Metsemakers JFM, Van Den Akker M. Magnitude and  
4 determinants of multimorbidity and health care utilization among patients attending public versus  
5 private primary care: A cross-sectional study from Odisha, India. *International Journal for Equity in*  
6 *Health*. 2020;19(1):57.
- 7 40. Ahmadi B, Alimohammadian M, Yaseri M, Majidi A, Boreiri M, Islami F, et al.  
8 Multimorbidity: Epidemiology and Risk Factors in the Golestan Cohort Study, Iran: A Cross-  
9 Sectional Analysis. *Medicine*. 2016;95(7):e2756.
- 10 41. Ataguba JE. Inequalities in multimorbidity in South Africa. *Intern*. 2013;12:64.
- 11 42. Kunna R, Miguel San S, Jennifer Stewart W. Measurement and decomposition of  
12 socioeconomic inequality in single and multimorbidity in older adults in China and Ghana: results  
13 from the WHO study on global AGEing and adult health (SAGE). *Intern*. 2017;16.
- 14 43. Nunes BP, Thume E, Facchini LA. Multimorbidity in older adults: magnitude and challenges  
15 for the Brazilian health system. *BMC Public Health*. 2015;15:1172.
- 16 44. Habib RR, Mikati D, Hojeij S, El Asmar K, Chaaya M, Zurayk R. Associations between poor  
17 living conditions and multi-morbidity among Syrian migrant agricultural workers in Lebanon.  
18 *European journal of public health*. 2016;26(6):1039-44.
- 19 45. Shadmi E. Disparities in multiple chronic conditions within populations. *Journal of*  
20 *comorbidity*. 2013;3(Spec Issue):45-50.
- 21 46. Melo LAd, Lima KCd. Factors associated with the most frequent multimorbidities in  
22 Brazilian older adults. *Ciencia & saude coletiva*. 2020;25(10):3879-88.
- 23 47. Korea National Health & Nutrition Survey. National Diet and Nutrition Survey [Internet].  
24 2018 [updated c2018; cited 2021 Oct 25]. Available from:  
25 <https://knhanes.cdc.go.kr/knhanes/eng/index.do>.
- 26 48. Basham CA. Regional variation in multimorbidity prevalence in British Columbia, Canada: a  
27 cross-sectional analysis of Canadian Community Health Survey data, 2015/16. *Health Promot*  
28 *Chronic Dis Prev Can*. 2020;40(7-8):225-34.
- 29 49. Douglas KA, Vinjerui KH, Krokstad S, Bjorngaard JH, Sund ER. Socioeconomic position,  
30 multimorbidity and mortality in a population cohort: The hunt study. *Journal of Clinical Medicine*.  
31 2020;9(9):1-13.
- 32 50. Guimaraes RM, Andrade FCD. Healthy life-expectancy and multimorbidity among older  
33 adults: Do inequality and poverty matter? *Arch Gerontol Geriatr*. 2020;90((Guimaraes) Fundacao  
34 Oswaldo Cruz, Avenida Brasil, 4365, Mangueiros, Rio de Janeiro, RJ 21041-360, Brazil(Guimaraes,  
35 Andrade) University of Illinois at Urban-Champaign, 1010W Nevada Street, Office 2107, Urbana, IL  
36 61801, United States):104157.
- 37 51. Harrison C, Britt H, Miller G, Henderson J. Examining different measures of multimorbidity,  
38 using a large prospective cross-sectional study in Australian general practice. *BMJ open*.  
39 2014;4(7):e004694.
- 40 52. Kivimaki M, Batty GD, Pentti J, Shipley MJ, Sipila PN, Nyberg ST, et al. Association  
41 between socioeconomic status and the development of mental and physical health conditions in  
42 adulthood: a multi-cohort study. *LANCET PUBLIC HEALTH*. 2020;5(3):E140-E9.
- 43 53. Calderon-Larranaga A, Marengoni A, Roso-Llorach A, Fernandez-Bertolin S, Guisado-  
44 Clavero M, Violan C, et al. Patterns of Multimorbidity in a Population-Based Cohort of Older People:  
45 Sociodemographic, Lifestyle, Clinical, and Functional Differences. *The journals of gerontology Series*  
46 *A, Biological sciences and medical sciences*. 2020;75(4):798-805.
- 47 54. Carrilero N, Dalmau-Bueno A, Garcia-Altes A. Comorbidity patterns and socioeconomic  
48 inequalities in children under 15 with medical complexity: a population-based study. *BMC*  
49 *PEDIATRICS*. 2020;20(1).
- 50 55. Shang X, Peng W, Wu J, He M, Zhang L. Leading determinants for multimorbidity in  
51 middle-aged Australian men and women: A nine-year follow-up cohort study. *Prev Med*.  
52 2020;141((Shang, Wu, He, Zhang) Centre for Eye Research Australia, Royal Victorian Eye and Ear  
53 Hospital, Melbourne, Australia(Shang) School of Behavioural and Health Sciences, Australian  
54 Catholic University, Australia(Shang) Department of Medicine (Royal Melbourne):106260.
- 55 56. Vinjerui KH, Boeckxstaens P, Douglas KA, Sund ER. Prevalence of multimorbidity with  
56 frailty and associations with socioeconomic position in an adult population: Findings from the cross-  
57 sectional HUNT Study in Norway. *BMJ Open*. 2020;10(6):e035070.
- 58  
59  
60

## Preferred Reporting Items for Systematic reviews and Meta-Analyses extension for Scoping Reviews (PRISMA-ScR) Checklist

| SECTION                                               | ITEM | PRISMA-ScR CHECKLIST ITEM                                                                                                                                                                                                                                                                                  | REPORTED ON PAGE # |
|-------------------------------------------------------|------|------------------------------------------------------------------------------------------------------------------------------------------------------------------------------------------------------------------------------------------------------------------------------------------------------------|--------------------|
| <b>TITLE</b>                                          |      |                                                                                                                                                                                                                                                                                                            |                    |
| Title                                                 | 1    | Identify the report as a scoping review.                                                                                                                                                                                                                                                                   |                    |
| <b>ABSTRACT</b>                                       |      |                                                                                                                                                                                                                                                                                                            |                    |
| Structured summary                                    | 2    | Provide a structured summary that includes (as applicable): background, objectives, eligibility criteria, sources of evidence, charting methods, results, and conclusions that relate to the review questions and objectives.                                                                              |                    |
| <b>INTRODUCTION</b>                                   |      |                                                                                                                                                                                                                                                                                                            |                    |
| Rationale                                             | 3    | Describe the rationale for the review in the context of what is already known. Explain why the review questions/objectives lend themselves to a scoping review approach.                                                                                                                                   |                    |
| Objectives                                            | 4    | Provide an explicit statement of the questions and objectives being addressed with reference to their key elements (e.g., population or participants, concepts, and context) or other relevant key elements used to conceptualize the review questions and/or objectives.                                  |                    |
| <b>METHODS</b>                                        |      |                                                                                                                                                                                                                                                                                                            |                    |
| Protocol and registration                             | 5    | Indicate whether a review protocol exists; state if and where it can be accessed (e.g., a Web address); and if available, provide registration information, including the registration number.                                                                                                             |                    |
| Eligibility criteria                                  | 6    | Specify characteristics of the sources of evidence used as eligibility criteria (e.g., years considered, language, and publication status), and provide a rationale.                                                                                                                                       |                    |
| Information sources*                                  | 7    | Describe all information sources in the search (e.g., databases with dates of coverage and contact with authors to identify additional sources), as well as the date the most recent search was executed.                                                                                                  |                    |
| Search                                                | 8    | Present the full electronic search strategy for at least 1 database, including any limits used, such that it could be repeated.                                                                                                                                                                            |                    |
| Selection of sources of evidence†                     | 9    | State the process for selecting sources of evidence (i.e., screening and eligibility) included in the scoping review.                                                                                                                                                                                      |                    |
| Data charting process‡                                | 10   | Describe the methods of charting data from the included sources of evidence (e.g., calibrated forms or forms that have been tested by the team before their use, and whether data charting was done independently or in duplicate) and any processes for obtaining and confirming data from investigators. |                    |
| Data items                                            | 11   | List and define all variables for which data were sought and any assumptions and simplifications made.                                                                                                                                                                                                     |                    |
| Critical appraisal of individual sources of evidence§ | 12   | If done, provide a rationale for conducting a critical appraisal of included sources of evidence; describe the methods used and how this information was used in any data synthesis (if appropriate).                                                                                                      |                    |
| Synthesis of results                                  | 13   | Describe the methods of handling and summarizing the data that were charted.                                                                                                                                                                                                                               |                    |

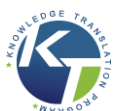



| SECTION                                       | ITEM | PRISMA-ScR CHECKLIST ITEM                                                                                                                                                                       | REPORTED ON PAGE # |
|-----------------------------------------------|------|-------------------------------------------------------------------------------------------------------------------------------------------------------------------------------------------------|--------------------|
| <b>RESULTS</b>                                |      |                                                                                                                                                                                                 |                    |
| Selection of sources of evidence              | 14   | Give numbers of sources of evidence screened, assessed for eligibility, and included in the review, with reasons for exclusions at each stage, ideally using a flow diagram.                    |                    |
| Characteristics of sources of evidence        | 15   | For each source of evidence, present characteristics for which data were charted and provide the citations.                                                                                     |                    |
| Critical appraisal within sources of evidence | 16   | If done, present data on critical appraisal of included sources of evidence (see item 12).                                                                                                      |                    |
| Results of individual sources of evidence     | 17   | For each included source of evidence, present the relevant data that were charted that relate to the review questions and objectives.                                                           |                    |
| Synthesis of results                          | 18   | Summarize and/or present the charting results as they relate to the review questions and objectives.                                                                                            |                    |
| <b>DISCUSSION</b>                             |      |                                                                                                                                                                                                 |                    |
| Summary of evidence                           | 19   | Summarize the main results (including an overview of concepts, themes, and types of evidence available), link to the review questions and objectives, and consider the relevance to key groups. |                    |
| Limitations                                   | 20   | Discuss the limitations of the scoping review process.                                                                                                                                          |                    |
| Conclusions                                   | 21   | Provide a general interpretation of the results with respect to the review questions and objectives, as well as potential implications and/or next steps.                                       |                    |
| <b>FUNDING</b>                                |      |                                                                                                                                                                                                 |                    |
| Funding                                       | 22   | Describe sources of funding for the included sources of evidence, as well as sources of funding for the scoping review. Describe the role of the funders of the scoping review.                 |                    |

JBI = Joanna Briggs Institute; PRISMA-ScR = Preferred Reporting Items for Systematic reviews and Meta-Analyses extension for Scoping Reviews.

\* Where *sources of evidence* (see second footnote) are compiled from, such as bibliographic databases, social media platforms, and Web sites.

† A more inclusive/heterogeneous term used to account for the different types of evidence or data sources (e.g., quantitative and/or qualitative research, expert opinion, and policy documents) that may be eligible in a scoping review as opposed to only studies. This is not to be confused with *information sources* (see first footnote).

‡ The frameworks by Arksey and O'Malley (6) and Levac and colleagues (7) and the JBI guidance (4, 5) refer to the process of data extraction in a scoping review as data charting.

§ The process of systematically examining research evidence to assess its validity, results, and relevance before using it to inform a decision. This term is used for items 12 and 19 instead of "risk of bias" (which is more applicable to systematic reviews of interventions) to include and acknowledge the various sources of evidence that may be used in a scoping review (e.g., quantitative and/or qualitative research, expert opinion, and policy document).

From: Tricco AC, Lillie E, Zarin W, O'Brien KK, Colquhoun H, Levac D, et al. PRISMA Extension for Scoping Reviews (PRISMA-ScR): Checklist and Explanation. *Ann Intern Med.* 2018;169:467–473. doi: [10.7326/M18-0850](https://doi.org/10.7326/M18-0850).



# BMJ Open

## Theoretical explanations for socioeconomic inequalities in multimorbidity – A Scoping Review

|                                 |                                                                                                                                                                                                                                                                                                                                                                                                                                                                                                                                                                                                                                                                                                                          |
|---------------------------------|--------------------------------------------------------------------------------------------------------------------------------------------------------------------------------------------------------------------------------------------------------------------------------------------------------------------------------------------------------------------------------------------------------------------------------------------------------------------------------------------------------------------------------------------------------------------------------------------------------------------------------------------------------------------------------------------------------------------------|
| Journal:                        | <i>BMJ Open</i>                                                                                                                                                                                                                                                                                                                                                                                                                                                                                                                                                                                                                                                                                                          |
| Manuscript ID                   | bmjopen-2021-055264.R2                                                                                                                                                                                                                                                                                                                                                                                                                                                                                                                                                                                                                                                                                                   |
| Article Type:                   | Original research                                                                                                                                                                                                                                                                                                                                                                                                                                                                                                                                                                                                                                                                                                        |
| Date Submitted by the Author:   | 25-Jan-2022                                                                                                                                                                                                                                                                                                                                                                                                                                                                                                                                                                                                                                                                                                              |
| Complete List of Authors:       | Fleitas Alfonzo, Ludmila; The University of Melbourne School of Population and Global Health, Centre for Health Equity<br>King, Tania ; The University of Melbourne School of Population and Global Health, Centre for Health Equity<br>You, Emily; The University of Melbourne Faculty of Medicine Dentistry and Health Sciences, Academic Unit for Psychiatry of Old Age, Department of Psychiatry<br>Contreras-Suarez, Diana; University of Melbourne, Melbourne Institute: Applied Economic & Social Research<br>Zulkelfi, Syafiqah; The University of Melbourne School of Population and Global Health, Centre for Health Equity<br>Singh, Ankur; University of Melbourne, Centre of Epidemiology and Biostatistics |
| <b>Primary Subject Heading</b>: | Epidemiology                                                                                                                                                                                                                                                                                                                                                                                                                                                                                                                                                                                                                                                                                                             |
| Secondary Subject Heading:      | Public health                                                                                                                                                                                                                                                                                                                                                                                                                                                                                                                                                                                                                                                                                                            |
| Keywords:                       | EPIDEMIOLOGY, PUBLIC HEALTH, SOCIAL MEDICINE                                                                                                                                                                                                                                                                                                                                                                                                                                                                                                                                                                                                                                                                             |
|                                 |                                                                                                                                                                                                                                                                                                                                                                                                                                                                                                                                                                                                                                                                                                                          |

SCHOLARONE™  
Manuscripts

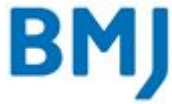

I, the Submitting Author has the right to grant and does grant on behalf of all authors of the Work (as defined in the below author licence), an exclusive licence and/or a non-exclusive licence for contributions from authors who are: i) UK Crown employees; ii) where BMJ has agreed a CC-BY licence shall apply, and/or iii) in accordance with the terms applicable for US Federal Government officers or employees acting as part of their official duties; on a worldwide, perpetual, irrevocable, royalty-free basis to BMJ Publishing Group Ltd ("BMJ") its licensees and where the relevant Journal is co-owned by BMJ to the co-owners of the Journal, to publish the Work in this journal and any other BMJ products and to exploit all rights, as set out in our [licence](#).

The Submitting Author accepts and understands that any supply made under these terms is made by BMJ to the Submitting Author unless you are acting as an employee on behalf of your employer or a postgraduate student of an affiliated institution which is paying any applicable article publishing charge ("APC") for Open Access articles. Where the Submitting Author wishes to make the Work available on an Open Access basis (and intends to pay the relevant APC), the terms of reuse of such Open Access shall be governed by a Creative Commons licence – details of these licences and which [Creative Commons](#) licence will apply to this Work are set out in our licence referred to above.

Other than as permitted in any relevant BMJ Author's Self Archiving Policies, I confirm this Work has not been accepted for publication elsewhere, is not being considered for publication elsewhere and does not duplicate material already published. I confirm all authors consent to publication of this Work and authorise the granting of this licence.

**Theoretical explanations for socioeconomic inequalities in multimorbidity – A Scoping Review**

Ludmila Fleitas Alfonzo<sup>a</sup>, MPH, Tania King<sup>a</sup>, PhD, Emily You<sup>b</sup>, PhD, Diana Contreras Suárez<sup>c</sup>, PhD, Syafiqah Zulkelfi<sup>a</sup>, MSc, Ankur Singh<sup>d</sup>, PhD

- a. Centre for Health Equity, Melbourne School of Population & Global Health. The University of Melbourne. 207 Bouverie Street, Melbourne. Victoria 3004, Australia
  - b. Academic Unit for Psychiatry of Old Age, Department of Psychiatry, Medical School, University of Melbourne. Ground Floor, Building 5, 34-54 Poplar Road, Parkville VIC 3052, Australia
  - c. Melbourne Institute: Applied Economic & Social Research, University of Melbourne. 111 Barry Street, Melbourne. Victoria 3010, Australia
  - d. Centre of Epidemiology and Biostatistics, Melbourne School of Population & Global Health. The University of Melbourne. 207 Bouverie Street, Melbourne. Victoria 3004, Australia
- 

**Corresponding Author:**

Ludmila Fleitas Alfonzo  
Disability and health unit | Centre for Health Equity  
Melbourne School Population and Global Health  
Level 4, 207, Bouverie Street  
The University of Melbourne, Victoria 3010 Australia  
E: ludmila.fleitasalfonzo@unimelb.edu.au

**Wordcount**

Abstract: 298 words. Main text: 3215 words

**Figures and tables:** 1 figure and 3 tables.

## ABSTRACT

**Objective:** To document socio-epidemiologic theories used to explain the relationship between socioeconomic disadvantage and multimorbidity.

**Design:** Scoping review

**Methods:** A search strategy was developed and then applied to multiple electronic databases including Medline, EMBASE, PsychInfo, Web of Science, Scielo, Applied Social Sciences, ERIC, Humanities Index and Sociological Abstracts. After the selection of studies, data was extracted using a data charting plan. The last search was performed on the 28<sup>th</sup> of September 2021. Extracted data included: study design, country, population sub-groups, measures of socioeconomic inequality, assessment of multimorbidity and conclusion on the association between socioeconomic variables and multimorbidity. Included studies were further assessed on their use of theory, type of theories used and context of application. Finally, we conducted a meta-narrative synthesis to summarise the results.

**Results:** A total of 64 studies were included in the review. Of these, 33 papers included theories as explanations for the association between socioeconomic position and multimorbidity. Within this group, sixteen explicitly stated those theories and five tested at least one theory. Behavioural theories (health behaviours) were the most frequently used, followed by materialist (access to health resources) and psychosocial (stress pathways) theories. Most studies used theories as post hoc explanations for their findings or for study rationale. Supportive evidence was found for the role of material, behavioural and life course theories in explaining the relationship between social inequalities and multimorbidity.

**Conclusion:** Given the widely reported social inequalities in multimorbidity and its increasing public health burden there is a critical gap in evidence on pathways from socioeconomic disadvantage to multimorbidity. Generating evidence of these pathways will guide the development of intervention and public policies to prevent multimorbidity among people living in social disadvantage. Material, behavioural and life course pathways can be targeted to reduce the negative effect of low socioeconomic position on multimorbidity.

**Keywords:** multimorbidity, socioeconomic inequalities, scoping review, theoretical explanations, epidemiology

### Strengths and limitations:

- This is the first scoping review exploring the use of theories to explain the association between socioeconomic position and multimorbidity.
- Our review has identified critical gaps in the literature that must be addressed if interventions and public policies are to be designed to reduce socioeconomic inequalities in multimorbidity.
- We applied a comprehensive search strategy to identify relevant articles and applied a peer-reviewed robust methodology to assess theories in studies on socioeconomic inequalities in multimorbidity.
- Articles that were not in English were excluded from our review. This could have obstructed the inclusion of papers from countries where English is not the main language, therefore limiting the generalisability of our findings.

## INTRODUCTION

Multimorbidity is a societal challenge and an increasingly recognised public health concern (1-3). It is described as the co-occurrence of two or more chronic conditions in an individual (4). Multimorbidity leads to reduced quality of life, high psychological distress, burden of polypharmacy and managing multiple treatment protocols, and an increased risk of premature death in people (5). There is an emerging threat of increased multimorbidity worldwide, primarily due to population aging and the epidemiological transition from communicable to non-communicable diseases (6). The COVID-19 pandemic has put a spotlight on multimorbidity as people with existing chronic conditions have suffered a higher risk of its infection, as well as more severe consequences of SARS-CoV-2 infection (7). Furthermore, multiple studies have reported socioeconomic inequalities in multimorbidity within countries regardless of their level of economic development (8-12).

A meta-analysis of 24 cross-sectional studies reported that low education compared to high education was associated with 64% higher odds of multimorbidity (13). Another systematic review with 41 studies from high income countries reported that people with the lowest level of income had 4.4 times higher odds of multimorbidity than those with the highest level of income, while those in most deprived areas had 1.42 times higher odds of multimorbidity than those in the least deprived areas (14). A clear causal relationship between socioeconomic conditions and multimorbidity has also been argued based on empirical evidence (10), however, pathways through which socioeconomic disadvantage leads to multimorbidity are not well studied (4).

Theories are used in epidemiology to understand the relationships between exposure to, for example, socioeconomic disadvantage and non-communicable diseases. This is mainly because, as opposed to conceptual frameworks, specific theoretical pathways can be tested using empirical data. Theories provide insight into the mechanisms through which an exposure (e.g. socioeconomic position) leads to a health outcome (15), and as such, they are particularly helpful in informing intervention designs. Since the release of the Black Report in 1982 (16), several categories of theories have been proposed to explain associations between social inequalities and health outcomes (16, 17); albeit in the context of single diseases or health measure. These include:

- I. Behavioural: The behavioural explanation posits that people from different backgrounds behave differently and make health-related choices that are commonly

1  
2  
3 based on their socioeconomic background. As people experience socioeconomic  
4 deprivation, they also encounter more barriers to adopting healthy lifestyles. For  
5 instance, individual health damaging and promoting behaviours are differentially  
6 distributed across the social scale, with more disadvantaged groups more likely to  
7 engage in health damaging behaviours such as smoking, and advantaged groups more  
8 likely to engage in health promoting behaviours such as physical activity (18). As a  
9 result, poor health outcomes are commonly clustered at the lower end of the  
10 socioeconomic scale (17). Behavioural theory can be extended to apply to  
11 multimorbidity from a common risk factor approach, as a behavioural risk factor can  
12 cause multiple diseases (for example, smoking can cause cancer, asthma,  
13 cardiovascular diseases (19, 20)).

14  
15  
16  
17  
18  
19  
20  
21  
22 II. Psychosocial: this theory postulates that the emotions that arise due to social  
23 inequality can directly affect biological health (17). This can be caused in two ways,  
24 either through the practice of health compromising behaviours or through biological  
25 changes due to the individual being in a sustained state of stress (17). Hence, the  
26 behavioural explanation can be a descendent of psychosocial processes under this  
27 explanation. The perceived lack of control and psychosocial stress may lead to  
28 adverse health behaviours and may activate neuro-endocrine mechanisms, and in  
29 doing so, may affect multiple body systems and lead to multimorbidity.

30  
31  
32  
33  
34  
35  
36 III. Materialist: the material environment has a significant impact on the health of an  
37 individual. Exposure to health-risk or health-protective factors varies according to  
38 socioeconomic position due to differential access to material resources; differences  
39 are more evident in non-egalitarian societies. For instance, individuals living in  
40 socioeconomic disadvantage are less likely to be able to access information and  
41 resources necessary to maintain good health compared to their more advantaged  
42 counterparts (17). Socioeconomically deprived individuals are also more likely to be  
43 exposed to hazardous working environments (17). The materialist theory proposes  
44 these explanations as pathways between socioeconomic deprivation and health  
45 inequalities (17). Lack of material resources such as inadequate housing for example,  
46 can lead to multimorbidity by causing depression as well as respiratory illnesses such  
47 as asthma.

48  
49  
50  
51  
52  
53  
54  
55  
56  
57 IV. Social support: this theory holds that positive social support mitigates the detrimental  
58 effect of socioeconomic deprivation in health (21, 22). Accordingly, strong social  
59 networks and good social relationships are linked to good health and conversely, poor  
60



1  
2  
3 social relations and weak social support networks are deleterious to health. Social  
4 support is considered to be a distal determinant of health that may influence health  
5 through multiple mechanisms, for example by reducing stress and providing access to  
6 local resources, and in doing so, may prevent both mental and physical  
7 multimorbidity.  
8  
9

- 10  
11  
12 V. Social capital: While variously defined, social capital is broadly described as the  
13 functioning of social groups through a shared sense of identity, trust, cooperation,  
14 reciprocity and shared understandings, norms, and values (23). Social capital  
15 emphasises that a more unequal distribution in income undermines trust and damages  
16 social relationships at a population level. This theory attempts to explain why  
17 egalitarian societies tend to be healthier than non-egalitarian societies (24, 25).  
18 Similar to social support, high social capital is likely to boost health and prevent  
19 multimorbidity by reducing stressors and increasing access to shared resources.  
20  
21  
22  
23  
24  
25

26  
27 In addition to the abovementioned theories, a life course framework examines the effect of  
28 early life socioeconomic exposures on later health outcomes (26). Two models are proposed  
29 to explain the life course framework: the accumulation model and the critical periods model.  
30 The accumulation model emphasises the cumulative effect of exposure to socioeconomic  
31 disadvantage across different stages in life on subsequent increased risk of poor health  
32 outcomes (27). The critical periods model focuses on the effect of exposure to factors  
33 influencing health during critical periods of development (27). Finally, a neo-liberal  
34 framework for health inequalities emphasises the role of political arrangements in leading to  
35 socioeconomic inequalities, and in turn health inequalities (28).  
36  
37  
38  
39  
40  
41  
42

43 We aim to review the socio-epidemiologic theories applied to explain the relationship  
44 between socioeconomic disadvantage and multimorbidity in the population. Where possible,  
45 we examined whether theories applied were tested using robust analytical methods such as  
46 mediation analysis.  
47  
48  
49

## 50 **METHODS**

51 We conducted a scoping review to examine epidemiologic theories applied to explain the  
52 association between socioeconomic disadvantage and multimorbidity (29, 30), and to map the  
53 information available in the current literature. Because the primary purpose of this study was  
54 to identify and categorise the theories being used in the existing literature, a scoping review  
55  
56  
57  
58  
59  
60



1  
2  
3 was preferred over a systematic review. We followed the steps of a scoping review as per  
4 previously defined guidelines (29, 30).  
5  
6

### 7 **Stage I: Identifying the Research Question**

8  
9 Our review question was: “How are the socio-epidemiologic theories applied to explain the  
10 relationship between socioeconomic disadvantage and multimorbidity?”  
11  
12

### 13 **Stage II: Identifying Relevant Studies**

14  
15 We identified search terms and keywords relevant to socioeconomic disadvantage, theoretical  
16 pathways and multimorbidity from published systematic reviews (13, 31) and tailored them  
17 to answer our research question. First, a detailed search strategy was developed using  
18 keywords and hierarchically defined subject headings. Once the search terms were agreed  
19 upon, they were adapted for multiple electronic databases including Medline, EMBASE,  
20 PsychInfo (Ovid platform), Web of Science, Scielo, Applied Social Sciences, ERIC,  
21 Humanities Index and Sociological Abstracts (see *Appendix 1*). The reference lists of all  
22 selected articles were screened to identify any additional studies. Search alerts were set up to  
23 notify the research team of articles published after 25<sup>th</sup> of May 2018 when literature search  
24 was implemented. This search was updated on 11 December 2019 and then on 28 September  
25 2021.  
26  
27  
28  
29  
30  
31  
32  
33  
34

### 35 **Stage III: Study Selection**

36  
37 We applied a strict inclusion and exclusion criteria; these are displayed in Table 1. We use  
38 the term socioeconomic position to reflect socioeconomic status of individuals or groups in  
39 the population. Socioeconomic status indicates the position in which an individual or a group  
40 is located within the social structure. It can be measured using educational attainment,  
41 income, occupation, wealth and area level measures (deprivation, socio-economic scores).  
42 We use the term socioeconomic inequalities in health to indicate the differences in disease  
43 levels between people living with different socioeconomic positions. Socioeconomic  
44 disadvantage refers to those who have the low socioeconomic position. For inclusion in this  
45 review, socioeconomic position could be measured using the following indicators:  
46 occupation, income (household or individual), educational attainment, area level  
47 socioeconomic deprivation, wealth, and social class (17, 32).  
48  
49  
50  
51  
52  
53  
54  
55

56 We excluded studies on “comorbidity” as such studies are focussed on an index condition  
57 (e.g. diabetes) (33). The terms multimorbidity and comorbidity are often used  
58 interchangeably as both describe the presence of multiple chronic conditions. However,  
59  
60

1  
2  
3 comorbidity is a disease-centred term that describes the presence of additional conditions  
4 associated with an index disease (4). The focus of this review is multimorbidity only. Studies  
5 on institutionalised individuals, qualitative research, and those written in a language other  
6 than English were excluded. A detailed list of inclusion and exclusion criteria can be found in  
7 *Table 1*. Abstracts and full-text articles were reviewed for inclusion by LFA using the citation  
8 manager EndNote. A second reviewer (AS) cross-checked 10% of these articles.  
9

10  
11  
12  
13  
14 *See Table 1*

#### 15 16 17 **Stage IV: Charting the Data**

18 A data charting form was created which included study details (study design, country,  
19 population sub-groups, measures of socioeconomic inequality, assessment of multimorbidity  
20 and conclusion on the association between socioeconomic variables and multimorbidity), use  
21 of theory, type of theories and context of application. Use of theory was categorised as  
22 inferred by us (reviewers/readers) or explicitly mentioned by the original study authors. It is  
23 important to distinguish between the two because the former relies on the reviewers/readers'  
24 subjective judgement (which may not be accurate) while the latter accurately reflects the  
25 theoretical reasoning of the original authors. Data charting was performed by LFA and 10%  
26 of the studies were cross checked by AS.  
27  
28  
29  
30  
31  
32  
33

34  
35 Each study was examined for the type of theory (example: psychosocial or material), extent  
36 of use (whether used in a post hoc manner or integrated within an analysis) and their context  
37 of use (background, methods or discussion section of retrieved paper(s)). We recorded  
38 whether theories that were directly mentioned or inferred were consistent with any of the  
39 existing socio-epidemiologic theories. When directly mentioned, types of theories were  
40 recorded verbatim. This follows the approach previously applied in a published study  
41 examining the application of socio-epidemiologic theories in studies on the relationship  
42 between social inequality and oral health (31).  
43  
44  
45  
46  
47  
48

#### 49 50 **Stage V: Collating, Summarizing and Reporting the Results**

51 We carried out a narrative synthesis to summarise the results from the retrieved data. Because  
52 the objective of this review is to offer a snapshot of the available evidence of theories  
53 explaining socioeconomic inequalities in multimorbidity and not on assessing the effect of  
54 socioeconomic disadvantage on multimorbidity development, we did not assess the quality of  
55 included papers in accordance with the guidelines for conducting scoping reviews (29).  
56  
57  
58  
59  
60

## Patient and public involvement

No patients were directly involved in this study as this is a review of published studies.

## RESULTS

Our initial search led to the identification of 751 unique papers that underwent title and abstract screening. Sixty-nine papers were deemed eligible for full-text review. In addition, two studies were included for full-text review from other sources. Thirty-six studies proceeded to data charting stage after completion of full-text review. Appendix 2 displays a list of studies with reasons for exclusion after full-text review. The updated search on 28 September 2021 led to a further screening of 461 titles and abstracts from the 573 newly identified records. After full text screening of 44 studies, 27 new studies were included in the review. A total of 64 studies were included in this review. A flowchart of this process is shown in Figure 1.

Figure 1 Flow chart of the study selection process (*2-column fitting image*)  
(*see figure 1*)

### Summary characteristics of included studies

Twenty studies were from low- and middle-income countries (12, 34-52) and the remaining 45 studies were from high income countries. The majority of articles were conducted among adults and only three study included children (53-55). More than half (n=38/64) were cross-sectional and 26/64 used longitudinal data (9, 10, 42, 54, 56-76)(Table 2).

Educational attainment was the preferred measure of socioeconomic position (n=38/64) and 38 studies used multiple measures of socioeconomic position as exposures. The majority of studies (n=51/64) simply documented the presence of multimorbidity and approximately one third (n=13/64) additionally examined different patterns of multimorbidity (9, 40, 41, 45, 47, 53, 55, 67-70, 72, 75, 77, 78)(Table 2).

*See Table 2*

### Types of theories

Overall, nearly half of studies (33/64) referred to at least one socio-epidemiological theory. Therefore, 31 studies can be considered largely atheoretical, without any emphasis on pathways through which socioeconomic disadvantage leads to multimorbidity. In the thirty three studies applying a theory, the following theories were referred to: behavioural (10, 34,

1  
2  
3 35, 37, 38, 40-42, 46, 51-53, 59, 71, 72, 79-82) materialist (38, 41, 42, 45, 46, 48, 50, 52, 71,  
4 72, 74, 79, 82-85) and psychosocial (34, 42, 51, 52, 57, 72, 73, 82, 84-86). In addition, four  
5 studies applied a theoretical construct called 'sense of coherence', which indicates an  
6 individual's coping capacity to deal with life and stressful events (87), and is an indicator of  
7 self-efficacy and psychosocial well-being (consistent with psychosocial explanations) (73),  
8 and also encompasses social capital (51), and social support (57) which are widely considered  
9 as psychosocial assets (Table 3). Five studies used a life-course framework (10, 55, 63, 64,  
10 74). Collectively, behavioural theory was the most referred to among studies.  
11  
12  
13  
14  
15  
16  
17

### 18 **Context of application of theories**

19 Of the papers using theories, fifteen explicitly stated those theories (10, 35, 38, 41, 57, 63, 64,  
20 72-74, 80, 82, 84-86), and the other 21 studies were inferred to be consistent with a presumed  
21 theoretical pathway, based on definitions from existing literature.  
22  
23  
24

25 *See Table 3*

### 26 **Testing the explanatory potential of theories**

27 Only five studies (10, 38, 63, 72, 80) tested variables consistent with theoretical pathways as  
28 mediators between socioeconomic disadvantage and multimorbidity. Applying material  
29 theory, Chung et al. (38), examined perceptions of financial hardship, an indicator of  
30 economic deprivation, as a mediator between housing tenure and multimorbidity. They found  
31 a small mediation effect (1.41%), indicating that increased financial burden puts private  
32 housing residents at a higher risk of suffering multimorbidity when compared with public  
33 housing residents (38).  
34  
35  
36  
37  
38  
39  
40  
41  
42

43 Drawing on behavioural theory as well as a life course framework, Katikireddi et al. (10),  
44 quantified mediation by five behavioural risk factors (diet, smoking, physical activity, alcohol  
45 and BMI) acting on the association between two socioeconomic measures (area-based  
46 deprivation and household income) and multimorbidity over the life course. Their analyses  
47 showed that the combination of behavioural factors partially mediated (by 40.8%) the inverse  
48 association between area level deprivation and multimorbidity.  
49  
50  
51  
52  
53

54 The life course framework was applied by Johnston et al. (63) in their examination of  
55 educational attainment during adulthood as a mediator of the association between father's  
56 occupational social class at birth and multimorbidity. Their analyses showed a partial  
57 attenuation of the effect of childhood socioeconomic position on multimorbidity by  
58  
59  
60

1  
2  
3 educational attainment. Authors did not report the proportion of effect that was mediated by  
4 adult educational attainment.  
5

6  
7 Mondor et al. (80) also drew on behavioural theory in their study that quantified the  
8 mediation effect of lifestyle factors (physical activity, smoking and BMI) on the association  
9 between income inequalities and multimorbidity. Lifestyle factors only explained a small  
10 proportion of observed income-related inequalities in multimorbidity. Physical activity  
11 explained 10.9% of income inequalities, while smoking and BMI only accounted for 1.8%  
12 and 0.4% respectively.  
13  
14  
15  
16  
17

18 Finally, Singh et al. (72) examined social support as a mediator between financial hardship  
19 and multimorbidity among Australian adults and found that 30% of the total effect of  
20 financial hardship on multimorbidity was transmitted through social support.  
21  
22  
23

## 24 **DISCUSSION**

### 25 **Summary of findings**

26 Overall, we found limited use of theories to explain the relationship between socioeconomic  
27 position and multimorbidity. When used, theories were seldom explicitly mentioned or tested.  
28 Among all the potential explanations, behavioural theories were the most frequently used,  
29 followed by materialist and then psychosocial theories.  
30  
31  
32  
33  
34

35 Only five studies tested the explanatory potential of theories and their mediation effect on the  
36 association between socioeconomic position and multimorbidity. Although we identified the  
37 use of seven different theories, materialist, behavioural, psychosocial and life course theories  
38 were the only ones tested. Existing evidence partially support these theories (10, 38, 63, 72,  
39 80), however their use was mostly limited to post-hoc explanations of findings in the overall  
40 literature.  
41  
42  
43  
44  
45

46 Our findings are consistent with the two major evidence gaps highlighted in the report  
47 ‘Multimorbidity: a priority for global health research’(4). First, evidence of the relationship  
48 between socioeconomic disadvantage and multimorbidity is largely cross-sectional. This is a  
49 limitation of the existing evidence, as temporal ordering between exposure (social  
50 disadvantage) and outcome (multimorbidity), a key undisputed criterion of causality (88), is  
51 difficult to establish cross-sectionally. Second, there is a paucity of evidence regarding  
52 pathways (e.g. behavioural, material, psychosocial) between the shared causal factor  
53 (exposure to socioeconomic disadvantage) and multiple conditions that co-occur in  
54  
55  
56  
57  
58  
59  
60

1  
2  
3 multimorbidity (4). The lack of evidence precludes policy makers from intervening on causal  
4 mechanisms that can prevent, or mitigate observed socioeconomic inequalities in  
5 multimorbidity (89). Among those studies testing theories, there was a predominance of the  
6 application of the behavioural theory. However, the use of contemporary approaches to  
7 causal inference, using a counterfactual framework to maximise exchangeability between  
8 exposed and unexposed participants, was limited (72, 89). Therefore, we cannot rule out bias  
9 arising from mediator-outcome confounding, time varying confounding or the presence  
10 exposure-outcome interaction. Approaches need to shift towards a more comprehensive  
11 examination of pathways to allow policymakers to select interventions with maximum  
12 capacity to reduce inequalities. It is also worth noting that given the variations in the  
13 relationship of interest according to individual (e.g. age) and contextual characteristics (e.g.  
14 country level of income development), future studies should examine the relevance of  
15 theories across different contexts and age groups.

### 26 **Strengths and limitations**

28 Our study has some strengths and limitations. To our knowledge, this is the first scoping  
29 review that explores the use of theories to explain the association between socioeconomic  
30 position and multimorbidity in the current literature. We identified numerous gaps in the  
31 literature that need to be addressed to improve our understanding of the socioeconomic  
32 inequalities in multimorbidity. Our search strategy drew on a wide range of electronic  
33 databases, and we used a robust methodology, already piloted and verified in previous work  
34 (31). A key limitation is that articles not in English were excluded in our review. Moreover,  
35 we did not use any tool to assess the quality of the included studies. This information is  
36 already provided by existing reviews (13, 14). Lastly, we restricted this review to articles  
37 assessing only multimorbidity and excluded those looking at comorbidities. We acknowledge  
38 that some authors use both terms interchangeably, therefore papers using the term  
39 comorbidity to indicate the presence of multiple independent chronic conditions may be  
40 missing from this review.

### 51 **CONCLUSION**

53 Our understanding of the pathways between socioeconomic inequalities and multimorbidity  
54 is limited and mostly unexplained. Studies often focus on the patterns of distribution of  
55 multimorbidity across the population, rather than the mechanisms shaping these distributions.  
56 Robust evidence from longitudinal and interventional studies is needed to understand the  
57  
58  
59  
60

1  
2  
3 pathways between socioeconomic disadvantage and multimorbidity. Generating such  
4 evidence will guide the development of interventions and public policies to prevent  
5 multimorbidity among people living in disadvantage.  
6  
7

#### 8 9 **Authors contribution statement:**

10 LFA contributed towards the development of search strategy, screening, data extraction and  
11 appraisal of included studies and manuscript preparation. AS contributed towards the design,  
12 development of search strategy, screening, data extraction and appraisal of included studies  
13 and manuscript preparation. EY contributed towards the development of search strategy, data  
14 extraction of included studies and manuscript preparation. TK and DCS contributed towards  
15 the development of search strategy and manuscript preparation. SZ contributed towards  
16 manuscript preparation.  
17  
18  
19

#### 20 21 **Competing interests**

22 The authors have no competing interests to declare.  
23

#### 24 25 **Funding**

26 This project was conducted with seed funding provided by the Economic and Social  
27 Participation Research Initiative (ESPRI) Hallmark Research Initiative by the University of  
28 Melbourne to AS, TK, EY and DCS.  
29

#### 30 31 **Acknowledgments**

32 TK is also supported by an Australian Research Council Discovery Early Career Research  
33 Award (DE200100607).  
34

#### 35 36 **Data availability statement**

37 All data relevant to the study are included in the article or uploaded as supplementary  
38 information.  
39

#### 40 41 **Ethics approval statement**

42 This study uses publicly available data and does not directly involve human participants.  
43  
44  
45  
46  
47  
48  
49  
50  
51  
52  
53  
54  
55  
56  
57  
58  
59  
60



## REFERENCES

1. Xu X, Mishra GD, Dobson AJ, Jones M. Progression of diabetes, heart disease, and stroke multimorbidity in middle-aged women: A 20-year cohort study. *PLoS medicine*. 2018;15(3):e1002516.
2. Tran J, Norton R, Conrad N, Rahimian F, Canoy D, Nazarzadeh M, et al. Patterns and temporal trends of comorbidity among adult patients with incident cardiovascular disease in the UK between 2000 and 2014: A population-based cohort study. *PLoS medicine*. 2018;15(3):e1002513.
3. Stanley J, Semper K, Millar E, Sarfati D. Epidemiology of multimorbidity in New Zealand: a cross-sectional study using national-level hospital and pharmaceutical data. *BMJ open*. 2018;8(5):e021689.
4. The Academy of Medical Sciences. *Multimorbidity: a priority for global health research*. London: The Academy of Medical Sciences; 2018.
5. Wallace E, Salisbury C, Guthrie B, Lewis C, Fahey T, Smith SM. Managing patients with multimorbidity in primary care. *BMJ*. 2015;350:h176.
6. Kingston A, Robinson L, Booth H, Knapp M, Jagger C, project M. Projections of multimorbidity in the older population in England to 2035: estimates from the Population Ageing and Care Simulation (PACSim) model. *Age Ageing*. 2018;47(3):374-80.
7. Iaccarino G, Grassi G, Borghi C, Ferri C, Salvetti M, Volpe M, et al. Age and Multimorbidity Predict Death Among COVID-19 Patients. *Hypertension*. 2020;76(2):366-72.
8. Ataguba JE. Inequalities in multimorbidity in South Africa. *Intern*. 2013;12:64.
9. Jackson CA, Dobson AJ, Tooth LR, Mishra GD. Lifestyle and Socioeconomic Determinants of Multimorbidity Patterns among Mid-Aged Women: A Longitudinal Study. *PLoS one*. 2016;11(6):e0156804.
10. Katikireddi SV, Skivington K, Leyland AH, Hunt K, Mercer SW. The contribution of risk factors to socioeconomic inequalities in multimorbidity across the lifecourse: a longitudinal analysis of the Twenty-07 cohort. *BMC medicine*. 2017;15(1):152.
11. Kunna R, San Sebastian M, Stewart Williams J. Measurement and decomposition of socioeconomic inequality in single and multimorbidity in older adults in China and Ghana: results from the WHO study on global AGEing and adult health (SAGE). *Intern*. 2017;16(1):79.
12. Nunes BP, Chiavegatto Filho ADP, Pati S, Cruz Teixeira DS, Flores TR, Camargo-Figuera FA, et al. Contextual and individual inequalities of multimorbidity in Brazilian adults: a cross-sectional national-based study. *BMJ open*. 2017;7(6):e015885.
13. Pathirana TI, Jackson CA. Socioeconomic status and multimorbidity: a systematic review and meta-analysis. *Australian and New Zealand journal of public health*. 2018;42(2):186-94.
14. Ingram E, Ledden S, Beardon S, Gomes M, Hogarth S, McDonald H, et al. Household and area-level social determinants of multimorbidity: a systematic review. *J Epidemiol Community Health*. 2021;75(3):232-41.
15. Arcaya MC, Arcaya AL, Subramanian SV. Inequalities in health: definitions, concepts, and theories. *Glob Health Action*. 2015;8(1):27106.
16. Townsend P, Davidson N, Black DS. *Inequalities in health : the Black report*. Townsend P, Davidson N, Black DS, Great Britain. Working Group on Inequalities in H, editors. Harmondsworth: Penguin; 1982.
17. Bartley M. *Health inequality : an introduction to theories, concepts, and methods*. Cambridge, UK: Polity Press; 2004.
18. Ball K, Timperio A, Salmon J, Giles-Corti B, Roberts R, Crawford D. Personal, social and environmental determinants of educational inequalities in walking: a multilevel study. *J Epidemiol Community Health*. 2007;61(2):108-14.
19. Pan A, Wang Y, Talaei M, Hu FB. Relation of Smoking With Total Mortality and Cardiovascular Events Among Patients With Diabetes Mellitus: A Meta-Analysis and Systematic Review. *Circulation*. 2015;132(19):1795-804.



20. Hughes K, Bellis MA, Hardcastle KA, Sethi D, Butchart A, Mikton C, et al. The effect of multiple adverse childhood experiences on health: a systematic review and meta-analysis. *Lancet Public Health*. 2017;2(8):e356-e66.
21. House JS, Landis KR, Umberson D. Social relationships and health. *Science*. 1988;241(4865):540-5.
22. Shumaker SA, Brownell A. Toward a theory of social support: Closing conceptual gaps. *Journal of social issues*. 1984;40(4):11-36.
23. Baum FE, Ziersch AM. Social capital. *J Epidemiol Community Health*. 2003;57(5):320-3.
24. Kawachi I, Berkman L. Social cohesion, social capital, and health. *Social epidemiology*. 2000;174(7).
25. Kawachi I, Kennedy BP. Health and social cohesion: why care about income inequality? *BMJ*. 1997;314(7086):1037-40.
26. Krieger N. A glossary for social epidemiology. *J Epidemiol Community Health*. 2001;55(10):693-700.
27. Kawachi I, Subramanian SV, Almeida-Filho N. A glossary for health inequalities. *J Epidemiol Community Health*. 2002;56(9):647-52.
28. Coburn D. Income inequality, social cohesion and the health status of populations: the role of neo-liberalism. *Social science & medicine*. 2000;51(1):135-46.
29. Levac D, Colquhoun H, O'Brien KK. Scoping studies: advancing the methodology. *Implement Sci*. 2010;5(1):69.
30. Arksey H, O'Malley L. Scoping studies: towards a methodological framework. *International Journal of Social Research Methodology*. 2005;8(1):19-32.
31. Singh A, Harford J, Schuch HS, Watt RG, Peres MA. Theoretical basis and explanation for the relationship between area-level social inequalities and population oral health outcomes - A scoping review. *SSM Popul Health*. 2016;2:451-62.
32. American Psychological Association. Measuring socioeconomic status and subjective social status. Public Interest Directorate, Socioeconomic Status Office, Resources and Publication. 2018.
33. Bonavita V, De Simone R. Towards a definition of comorbidity in the light of clinical complexity. *Neurol Sci*. 2008;29 Suppl 1(1):S99-102.
34. Afshar S, Roderick PJ, Kowal P, Dimitrov BD, Hill AG. Multimorbidity and the inequalities of global ageing: a cross-sectional study of 28 countries using the World Health Surveys. *Bmc Public Health*. 2015;15.
35. Alimohammadian M, Majidi A, Yaseri M, Ahmadi B, Islami F, Derakhshan M, et al. Multimorbidity as an important issue among women: results of a gender difference investigation in a large population-based cross-sectional study in West Asia. *BMJ open*. 2017;7(5):e013548.
36. Ba NV, Minh HV, Quang LB, Chuyen NV, Ha BTT, Dai TQ, et al. Prevalence and correlates of multimorbidity among adults in border areas of the Central Highland Region of Vietnam, 2017. *J*. 2019;9:2235042X19853382.
37. Banjare P, Pradhan J. Socio-economic inequalities in the prevalence of multi-morbidity among the rural elderly in Bargarh District of Odisha (India). *PloS one*. 2014;9(6):e97832.
38. Chung RY, Mercer S, Lai FT, Yip BH, Wong MC, Wong SY. Socioeconomic Determinants of Multimorbidity: A Population-Based Household Survey of Hong Kong Chinese. *PloS one*. 2015;10(10):e0140040.
39. Costa AK, Bertoldi AD, Fontanella AT, Ramos LR, Arrais PSD, Luiza VL, et al. Does socioeconomic inequality occur in the multimorbidity among Brazilian adults? *Rev Saude Publica*. 2020;54((Costa) Universidade Federal de Pelotas. Faculdade de Enfermagem. Programa de Pos-Graduacao em Enfermagem. Pelotas, RS, Brazil(Bertoldi) Universidade Federal de Pelotas. Faculdade de Medicina. Departamento de Medicina Social. Programa de Pos-Graduacao em):138.
40. Costa CDS, Flores TR, Wendt A, Neves RG, Tomasi E, Cesar JA, et al. Inequalities in multimorbidity among elderly: a population-based study in a city in Southern Brazil. *Cad Saude Publica*. 2018;34(11):e00040718.

- 1
- 2
- 3
- 4 41. Craig LS, Cunningham-Myrie CA, Hotchkiss DR, Hernandez JH, Gustat J, Theall KP. Social
- 5 determinants of multimorbidity in Jamaica: application of latent class analysis in a cross-sectional
- 6 study. *BMC Public Health*. 2021;21(1):1197.
- 7 42. Demirchyan A, Khachadourian V, Armenian HK, Petrosyan V. Short and long term
- 8 determinants of incident multimorbidity in a cohort of 1988 earthquake survivors in Armenia. *Intern*.
- 9 2013;12(68):68.
- 10 43. Garin N, Koyanagi A, Chatterji S, Tyrovolas S, Olaya B, Leonardi M, et al. Global
- 11 Multimorbidity Patterns: A Cross-Sectional, Population-Based, Multi-Country Study. *The journals of*
- 12 *gerontology Series A, Biological sciences and medical sciences*. 2016;71(2):205-14.
- 13 44. Habib RR, Hojeij S, Elzein K, Chaaban J, Seyfert K. Associations between life conditions and
- 14 multi-morbidity in marginalized populations: the case of Palestinian refugees. *European journal of*
- 15 *public health*. 2014;24(5):727-33.
- 16 45. Odland ML, Payne C, Witham MD, Siedner MJ, Barnighausen T, Bountogo M, et al.
- 17 Epidemiology of multimorbidity in conditions of extreme poverty: a population-based study of older
- 18 adults in rural Burkina Faso. *BMJ Glob Health*. 2020;5(3):e002096.
- 19 46. Pati S, Swain S, Knottnerus JA, Metsemakers JFM, van den Akker M. Magnitude and
- 20 determinants of multimorbidity and health care utilization among patients attending public versus
- 21 private primary care: a cross-sectional study from Odisha, India. *Intern*. 2020;19(1):57.
- 22 47. Sharma P, Maurya P. Gender differences in the Prevalence and Pattern of Disease
- 23 Combination of Chronic Multimorbidity among Indian Elderly. *Ageing International*. 2021.
- 24 48. Vidhyashree MD, Adhilakshmi R, Kamini B. Socio-Economic Determinants of Multimorbidity
- 25 among the Elderly Population in a Rural Area in Kancheepuram District of Tamil Nadu. *Journal of*
- 26 *Research in Medical and Dental Science*. 2021;9(7):436-41.
- 27 49. Weimann A, Dai D, Oni T. A cross-sectional and spatial analysis of the prevalence of
- 28 multimorbidity and its association with socioeconomic disadvantage in South Africa: A comparison
- 29 between 2008 and 2012. *Social science & medicine (1982)*. 2016;163:144-56.
- 30 50. Zhao Y, Atun R, Oldenburg B, McPake B, Tang S, Mercer SW, et al. Physical multimorbidity,
- 31 health service use, and catastrophic health expenditure by socioeconomic groups in China: an
- 32 analysis of population-based panel data. *The Lancet Global Health*. 2020;8(6):e840-e9.
- 33 51. Alaba O, Chola L. The social determinants of multimorbidity in South Africa. *Intern*.
- 34 2013;12:63.
- 35 52. Hone T, Stokes J, Trajman A, Saraceni V, Coeli CM, Rasella D, et al. Racial and socioeconomic
- 36 disparities in multimorbidity and associated healthcare utilisation and outcomes in Brazil: a cross-
- 37 sectional analysis of three million individuals. *BMC Public Health*. 2021;21(1):1287.
- 38 53. Barnett K, Mercer SW, Norbury M, Watt G, Wyke S, Guthrie B. Epidemiology of
- 39 multimorbidity and implications for health care, research, and medical education: a cross-sectional
- 40 study. *Lancet*. 2012;380(9836):37-43.
- 41 54. Cornish RP, Boyd A, Van Staa T, Salisbury C, Macleod J. Socio-economic position and
- 42 childhood multimorbidity: a study using linkage between the Avon Longitudinal Study of Parents and
- 43 Children and the General Practice Research Database. *Intern*. 2013;12(66):66.
- 44 55. Russell J, Morton SMB, Grant CC. Multimorbidity in Early Childhood and Socioeconomic
- 45 Disadvantage: Findings From a Large New Zealand Child Cohort. *Academic Pediatrics*.
- 46 2020;20(5):619-27.
- 47 56. Aminisani N, Stephens C, Allen J, Alpass F, Shamshirgaran SM. Socio-demographic and
- 48 lifestyle factors associated with multimorbidity in New Zealand. *Epidemiol Health*.
- 49 2020;42((Aminisani) Department of Epidemiology and Statistics, Faculty of Health Sciences,
- 50 Neyshabur University of Medical Sciences, Neyshabur, Iran, Islamic Republic of(Aminisani,
- 51 Shamshirgaran) Healthy Aging Research Centre, Neyshabur University of Medical Scie):e2020001.
- 52 57. Calderon-Larranaga A, Santoni G, Wang HX, Welmer AK, Rizzuto D, Vetrano DL, et al. Rapidly
- 53 developing multimorbidity and disability in older adults: does social background matter? *Journal of*
- 54 *internal medicine*. 2018;283(5):489-99.
- 55
- 56
- 57
- 58
- 59
- 60

- 1
- 2
- 3
- 4 58. Calvo E, Azar A, Shura R, Staudinger UM. A New Path to Address Multimorbidity?  
5 Longitudinal Analyses of Retirement Sequences and Chronic Diseases in Old Age. *J Appl Gerontol.*  
6 2021((Calvo, Staudinger) Columbia University, New York, NY, United States(Calvo, Azar) Universidad  
7 Mayor, Santiago, Chile(Azar) University of Chicago, IL, United States(Shura) Kent State University at  
8 Stark, North Canton, OH, United States(Staudinger) Technica):7334648211031038.
- 9 59. Canizares M, Hogg-Johnson S, Gignac MAM, Glazier RH, Badley EM. Increasing Trajectories  
10 of Multimorbidity Over Time: Birth Cohort Differences and the Role of Changes in Obesity and  
11 Income. *J Gerontol B Psychol Sci Soc Sci.* 2018;73(7):1303-14.
- 12 60. Dugravot A, Fayosse A, Dumurgier J, Bouillon K, Rayana TB, Schnitzler A, et al. Social  
13 inequalities in multimorbidity, frailty, disability, and transitions to mortality: a 24-year follow-up of  
14 the Whitehall II cohort study. *Lancet Public Health.* 2020;5(1):e42-e50.
- 15 61. Hayek S, Ifrah A, Enav T, Shohat T. Prevalence, Correlates, and Time Trends of Multiple  
16 Chronic Conditions Among Israeli Adults: Estimates From the Israeli National Health Interview  
17 Survey, 2014-2015. *Preventing chronic disease.* 2017;14:E64.
- 18 62. Head A, Fleming K, Kypridemos C, Schofield P, Pearson-Stuttard J, O'Flaherty M. Inequalities  
19 in incident and prevalent multimorbidity in England, 2004-19: a population-based, descriptive study.  
20 *The Lancet Healthy Longevity.* 2021;2(8):e489-e97.
- 21 63. Johnston MC, Black C, Mercer SW, Prescott GJ, Crilly MA. Impact of educational attainment  
22 on the association between social class at birth and multimorbidity in middle age in the Aberdeen  
23 Children of the 1950s cohort study. *BMJ open.* 2019;9(1):e024048.
- 24 64. Khanolkar AR, Chaturvedi N, Kuan V, Davis D, Hughes A, Richards M, et al. Socioeconomic  
25 inequalities in prevalence and development of multimorbidity across adulthood: A longitudinal  
26 analysis of the MRC 1946 National Survey of Health and Development in the UK. *PLoS medicine.*  
27 2021;18(9):e1003775.
- 28 65. Ki M, Lee YH, Kim YS, Shin JY, Lim J, Nazroo J. Socioeconomic inequalities in health in the  
29 context of multimorbidity: A Korean panel study. *PLoS one.* 2017;12(3):e0173770.
- 30 66. Kim J, Keshavjee S, Atun R. Trends, patterns and health consequences of multimorbidity  
31 among South Korea adults: Analysis of nationally representative survey data 2007-2016. *J Glob  
32 Health.* 2020;10(2):020426.
- 33 67. Lee SA, Joo S, Chai HW, Jun HJ. Patterns of multimorbidity trajectories and their correlates  
34 among Korean older adults. *Age Ageing.* 2021;50(4):1336-41.
- 35 68. Moller SP, Laursen B, Johannesen CK, Tolstrup JS, Schramm S. Patterns of multimorbidity  
36 and demographic profile of latent classes in a Danish population-A register-based study. *PLoS one.*  
37 2020;15(8):e0237375.
- 38 69. Park B, Lee HA, Park H. Use of latent class analysis to identify multimorbidity patterns and  
39 associated factors in Korean adults aged 50 years and older. *PLoS one.* 2019;14(11):e0216259.
- 40 70. Schafer I, Hansen H, Schon G, Hofels S, Altiner A, Dahlhaus A, et al. The influence of age,  
41 gender and socio-economic status on multimorbidity patterns in primary care. First results from the  
42 multicare cohort study. *BMC Health Serv Res.* 2012;12(1):89.
- 43 71. Seo S. Multimorbidity Development in Working People. *Int J Environ Res Public Health.*  
44 2019;16(23).
- 45 72. Singh A, Contreras Suarez D, You E, Fleitas Alfonso L, King T. Role of social support in the  
46 relationship between financial hardship and multimorbidity-a causal mediation analysis. *European  
47 journal of public health.* 2021;31(3):482-7.
- 48 73. Tomasdottir MO, Sigurdsson JA, Petursson H, Kirkengen AL, Ivar Lund Nilsen T, Hetlevik I, et  
49 al. Does 'existential unease' predict adult multimorbidity? Analytical cohort study on embodiment  
50 based on the Norwegian HUNT population. *BMJ open.* 2016;6(11):e012602.
- 51 74. Tucker-Seeley RD, Li Y, Sorensen G, Subramanian SV. Lifecourse socioeconomic  
52 circumstances and multimorbidity among older adults. *BMC Public Health.* 2011;11:313.
- 53 75. Zacarias-Pons L, Vilalta-Franch J, Turro-Garriga O, Saez M, Garre-Olmo J. Multimorbidity  
54 patterns and their related characteristics in European older adults: A longitudinal perspective. *Arch  
55*
- 56
- 57
- 58
- 59
- 60

- 1  
2  
3 Gerontol Geriatr. 2021;95((Zacarias-Pons, Vilalta-Franch, Turro-Garriga, Garre-Olmo) Research  
4 Group on Aging, Disability and Health, Girona Biomedical Research Institute (IDIBGI), Catalonia,  
5 Spain(Turro-Garriga, Garre-Olmo) Institut d'Assistencia Sanitaria, Catalonia, Spain(Saez)):104428.  
6 76. Zou S, Wang Z, Bhura M, Zhang G, Tang K. Prevalence and associated socioeconomic factors  
7 of multimorbidity in ten regions of China: a cross-sectional analysis. *The Lancet*.  
8 2020;396(Supplement 1):S12.  
9 77. Hernandez B, Voll S, Lewis NA, McCrory C, White A, Stirland L, et al. Comparisons of disease  
10 cluster patterns, prevalence and health factors in the USA, Canada, England and Ireland. *BMC Public*  
11 *Health*. 2021;21(1):1674.  
12 78. McLean G, Gunn J, Wyke S, Guthrie B, Watt GC, Blane DN, et al. The influence of  
13 socioeconomic deprivation on multimorbidity at different ages: a cross-sectional study. *The British*  
14 *journal of general practice : the journal of the Royal College of General Practitioners*.  
15 2014;64(624):e440-7.  
16 79. Andersen H, Kankaanranta H, Tuomisto LE, Piirila P, Sovijarvi A, Langhammer A, et al.  
17 Multimorbidity in Finnish and Swedish speaking Finns; association with daily habits and  
18 socioeconomic status - Nordic EpiLung cross-sectional study. *Prev Med Rep*. 2021;22:101338.  
19 80. Mondor L, Cohen D, Khan AI, Wodchis WP. Income inequalities in multimorbidity prevalence  
20 in Ontario, Canada: a decomposition analysis of linked survey and health administrative data. *Intern*.  
21 2018;17(1):90.  
22 81. Puth MT, Weckbecker K, Schmid M, Munster E. Prevalence of multimorbidity in Germany:  
23 impact of age and educational level in a cross-sectional study on 19,294 adults. *BMC Public Health*.  
24 2017;17(1):826.  
25 82. Wister A, Rosenkrantz L, Shashank A, Walker BB, Schuurman N. Multimorbidity and  
26 Socioeconomic Deprivation among Older Adults: A Cross-sectional Analysis in Five Canadian Cities  
27 Using the CLSA. *Journal of Aging and Environment*. 2020;34(4):435-54.  
28 83. Chamberlain AM, Finney Rutten LJ, Wilson PM, Fan C, Boyd CM, Jacobson DJ, et al.  
29 Correction to: Neighborhood socioeconomic disadvantage is associated with multimorbidity in a  
30 geographically-defined community. *BMC Public Health*. 2020;20(1):1412.  
31 84. Vinjerui KH, Bjerkeset O, Bjorngaard JH, Krokstad S, Douglas KA, Sund ER. Socioeconomic  
32 inequalities in the prevalence of complex multimorbidity in a Norwegian population: findings from  
33 the cross-sectional HUNT Study. *BMJ open*. 2020;10(6):e036851.  
34 85. Yildiz B, Schuring M, Knoef MG, Burdorf A. Chronic diseases and multimorbidity among  
35 unemployed and employed persons in the Netherlands: a register-based cross-sectional study. *BMJ*  
36 *open*. 2020;10(7):e035037.  
37 86. Agborsangaya CB, Lau D, Lahtinen M, Cooke T, Johnson JA. Multimorbidity prevalence and  
38 patterns across socioeconomic determinants: a cross-sectional survey. *BMC Public Health*.  
39 2012;12:201.  
40 87. Antonovsky A, Sourani T. Family sense of coherence and family adaptation. *Journal of*  
41 *Marriage and the Family*. 1988:79-92.  
42 88. Hill AB. The Environment and Disease: Association or Causation? *Proceedings of the Royal*  
43 *Society of Medicine*. 1965;58:295-300.  
44 89. VanderWeele TJ. *Explanation in causal inference : methods for mediation and interaction:*  
45 *New York Oxford University Press, [2015]; 2015.*  
46 90. Moin JS, Glazier RH, Kuluski K, Kiss A, Upshur REG. Examine the association between key  
47 determinants identified by the chronic disease indicator framework and multimorbidity by rural and  
48 urban settings. *J*. 2021;11(101693146):26335565211028157.  
49 91. Stokes T, Azam M, Noble FD. Multimorbidity in Maori and Pacific patients: cross-sectional  
50 study in a Dunedin general practice. *J Prim Health Care*. 2018;10(1):39-43.  
51 92. Nielsen CR, Halling A, Andersen-Ranberg K. Disparities in multimorbidity across Europe—  
52 findings from the SHARE survey. *European Geriatric Medicine*. 2017;8(1):16-21.  
53  
54  
55  
56  
57  
58  
59  
60

- 1  
2  
3 93. Congdon P. Area variations in multiple morbidity using a life table methodology. *Health Serv*  
4 *Outcomes Res Methodol.* 2016;16:58-74.  
5 94. Diaz E, Poblador-Pou B, Gimeno-Feliu LA, Calderon-Larranaga A, Kumar BN, Prados-Torres A.  
6 Multimorbidity and Its Patterns according to Immigrant Origin. A Nationwide Register-Based Study in  
7 Norway. *PLoS one.* 2015;10(12):e0145233.  
8 95. Prazeres F, Santiago L. Prevalence of multimorbidity in the adult population attending  
9 primary care in Portugal: a cross-sectional study. *BMJ open.* 2015;5(9):e009287.  
10 96. Roberts K, Rao D, Bennett T, Loukine L, Jayaraman G. Prevalence and patterns of chronic  
11 disease multimorbidity and associated determinants in Canada. *Health promotion and chronic*  
12 *disease prevention in Canada: research, policy and practice.* 2015;35(6):87.  
13 97. Violan C, Foguet-Boreu Q, Fernandez-Bertolin S, Guisado-Clavero M, Cabrera-Bean M,  
14 Formiga F, et al. Soft clustering using real-world data for the identification of multimorbidity  
15 patterns in an elderly population: Cross-sectional study in a Mediterranean population. *BMJ open.*  
16 2019;9 (8) (no pagination)(e029594).  
17  
18  
19  
20  
21  
22  
23  
24  
25  
26  
27  
28  
29  
30  
31  
32  
33  
34  
35  
36  
37  
38  
39  
40  
41  
42  
43  
44  
45  
46  
47  
48  
49  
50  
51  
52  
53  
54  
55  
56  
57  
58  
59  
60

Table 1. Study selection criteria.

| Inclusion criteria                                                                                                                                                                                                                                                                                                                                                                                                                                       | Exclusion criteria                                                                                                                                                                                                                                                                                                                                                      |
|----------------------------------------------------------------------------------------------------------------------------------------------------------------------------------------------------------------------------------------------------------------------------------------------------------------------------------------------------------------------------------------------------------------------------------------------------------|-------------------------------------------------------------------------------------------------------------------------------------------------------------------------------------------------------------------------------------------------------------------------------------------------------------------------------------------------------------------------|
| <ul style="list-style-type: none"> <li>-Studies with participants from any age group</li> <li>-Community representative participants</li> <li>-Individual and population-based epidemiological studies looking at the association between socio-economic disadvantage and multimorbidity</li> <li>-Intervention studies involving examining moderators or mediators derived from theoretical constructs</li> <li>-Studies in English language</li> </ul> | <ul style="list-style-type: none"> <li>-Studies on institutionalised individuals</li> <li>-Studies on comorbidity</li> <li>-Qualitative studies</li> <li>-Study protocols, editorials and commentaries that do not report on association between social disadvantage and multimorbidity</li> <li>-Literature reviews, scoping reviews and systematic reviews</li> </ul> |



Table 2. Summary characteristics of included studies

| Study                      | Study design    | Location                | Population focus                  | Assessment of multimorbidity (Presence/Nature/Extent/Both)   | List of chronic conditions                                                                                                                                                                                | Measure of Socioeconomic disadvantage            |
|----------------------------|-----------------|-------------------------|-----------------------------------|--------------------------------------------------------------|-----------------------------------------------------------------------------------------------------------------------------------------------------------------------------------------------------------|--------------------------------------------------|
| Andersen et al. 2021 (79)  | Cross-sectional | Finland                 | Adults aged 20-69 years           | Presence of multimorbidity<br>Cut-off of 2 conditions        | 18 chronic conditions including: respiratory diseases, cardiovascular diseases, diabetes, mental disorders, dyspepsia/reflux disease, chronic kidney failure, sleep apnea, osteoporosis, and chronic pain | Occupation.                                      |
| Calvo et al. 2021 (58)     | Longitudinal    | US                      | Adults aged 60-61 and 70-71 years | Count of chronic conditions                                  | Eight conditions including high blood pressure, diabetes, cancer, chronic lung disease, heart problems, stroke, mental illness, arthritis or rheumatism.                                                  | Retirement sequence                              |
| Craig et al. 2021 (41)     | Cross-sectional | Jamaica                 | Individuals aged 15-74 years      | Patterns of multimorbidity                                   | 11 chronic conditions including hypertension, obesity, hypercholesterolemia, diabetes, asthma, arthritis, cardiovascular disease, mental health disorders, COPD, stroke, and glaucoma.                    | Occupational status, education and income level. |
| Head et al. 2021 (62)      | Longitudinal    | England                 | Adults aged 18 years and over     | Presence of multimorbidity.<br>Cut-off of 2 and 3 conditions | 211 conditions listed elsewhere (62)                                                                                                                                                                      | Area level deprivation                           |
| Hernandez et al. 2021 (77) | Cross-sectional | 4 high income countries | Adults aged 52-85 years           | Patterns of multimorbidity                                   | 10 conditions including cardiovascular diseases, diabetes, arthritis, cancer, lung disease,                                                                                                               | Education, household income and employment.      |

| Study                      | Study design    | Location    | Population focus              | Assessment of multimorbidity (Presence/Nature/Extent/Both)  | List of chronic conditions                                                                                                                                                                                                                                    | Measure of Socioeconomic disadvantage      |
|----------------------------|-----------------|-------------|-------------------------------|-------------------------------------------------------------|---------------------------------------------------------------------------------------------------------------------------------------------------------------------------------------------------------------------------------------------------------------|--------------------------------------------|
|                            |                 |             |                               |                                                             | osteoporosis. and psychological disorders                                                                                                                                                                                                                     |                                            |
| Hone et al. 2021 (52)      | Cross-sectional | Brazil      | Individuals of any age        | Presence of multimorbidity<br>Count of chronic conditions   | 53 chronic conditions                                                                                                                                                                                                                                         | Education                                  |
| Khanolkar et al. 2021 (64) | Longitudinal    | UK          | Adults aged 36 to 69 years    | Presence of multimorbidity<br>Count of chronic conditions   | 18 health conditions including metabolic conditions, cardiovascular diseases, cancer, respiratory disorders, kidney disorders, gastrointestinal disorders, skin disorders, osteoarthritis, rheumatoid arthritis, neurological disorders and mental disorders. | Social class and education                 |
| Lee et al. 2021 (67)       | Longitudinal    | South Korea | Adults aged 45 years and over | Multimorbidity clusters<br>Cut-off of 2 conditions          | 9 chronic conditions including: hypertension, diabetes, cancer, chronic lung disease, liver disease, heart disease, cerebrovascular disease, arthritis or rheumatoid arthritis and depression                                                                 | Education, household income and employment |
| Moin et al. 2021 (90)      | Cross-sectional | Canada      | Adults aged 22 to 95 years    | Presence of multimorbidity<br>Cut-off of 2 and 3 conditions | 18 chronic diseases including cardiovascular diseases, respiratory conditions, diabetes, mental illness, musculoskeletal conditions, renal                                                                                                                    | Household income and education             |



| Study                          | Study design    | Location | Population focus                       | Assessment of multimorbidity (Presence/Nature/Extent/Both)             | List of chronic conditions                                                                                                                                                                                                                                                                                                  | Measure of Socioeconomic disadvantage                   |
|--------------------------------|-----------------|----------|----------------------------------------|------------------------------------------------------------------------|-----------------------------------------------------------------------------------------------------------------------------------------------------------------------------------------------------------------------------------------------------------------------------------------------------------------------------|---------------------------------------------------------|
|                                |                 |          |                                        |                                                                        | failure, inflammatory bowel failure and cancers.                                                                                                                                                                                                                                                                            |                                                         |
| Zacarias-Pons et al. 2021 (75) | Longitudinal    | Europe   | People aged 50 years and older         | Latent transition analysis for types of multimorbidity                 | Heart attack, hypertension, hypercholesterolaemia, stroke or cerebral vascular disease, diabetes or high blood sugar, chronic lung disease [COPD], cancer, stomach or duodenal ulcer, Parkinson disease, cataracts, dementia, other affective or emotional disorders, rheumatoid arthritis, osteoarthritis and osteoporosis | Education, employment and material deprivation index    |
| Vidyashree et al 2021 (48)     | Cross-sectional | India    | People aged 60 and above in rural area | Presence of multimorbidity (Cut off unclear)                           | Unclear                                                                                                                                                                                                                                                                                                                     | Economic dependency                                     |
| Sharma 2021 (47)               | Cross-sectional | India    | People aged 60 and above               | Presence and patterns of multimorbidity<br><br>Cut-off of 2 conditions | Arthritis, Rheumatism or Osteoarthritis, Cerebral embolism stroke or Thrombosis, Heart diseases, Diabetes, Chronic lung disease, Asthma, Depression, Hypertension, Alzheimer's disease, Cancer, Dementia, Liver or Gall bladder illness, Osteoporosis, Renal or Urinary tract infection, Cataract,                          | Educational attainment, working status, wealth quintile |

| Study                        | Study design    | Location    | Population focus              | Assessment of multimorbidity (Presence/Nature/Extent/Both) | List of chronic conditions                                                                                                                                                                                       | Measure of Socioeconomic disadvantage |
|------------------------------|-----------------|-------------|-------------------------------|------------------------------------------------------------|------------------------------------------------------------------------------------------------------------------------------------------------------------------------------------------------------------------|---------------------------------------|
|                              |                 |             |                               |                                                            | Loss of all-natural teeth, Accidental injury in the past one year, injury due to fall, skin disease and paralysis                                                                                                |                                       |
| Singh 2021 (72)              | Longitudinal    | Australia   | People aged 15 and above      | Presence of multimorbidity<br>Cut-off of 2 conditions      | Arthritis, cancer, type 1 diabetes mellitus, type 2 diabetes mellitus, hypertension, heart disease, asthma, bronchitis or depression                                                                             | Financial hardship                    |
| Aminisani et al. 2019 (56)   | Longitudinal    | New Zealand | Adults aged 55-70 year        | Presence of multimorbidity<br>Cut-off of 2 conditions      | Nine groups of chronic diseases: cardiovascular diseases, neurologic diseases, musculoskeletal conditions, diabetes mellitus, respiratory diseases, chronic liver conditions, cancer and mental disorders.       | Education and income                  |
| Chamberlain et al. 2020 (83) | Cross-sectional | US          | Adults aged 20 years and over | Presence of multimorbidity.<br>Cut-off of 2 conditions     | 21 conditions including cardiovascular diseases, metabolic conditions, respiratory diseases, arthritis, osteoporosis, chronic kidney disease, autism spectrum disorder, hepatitis, human immunodeficiency virus, | Area level deprivation                |

| Study                   | Study design    | Location     | Population focus               | Assessment of multimorbidity (Presence/Nature/Extent/Both)         | List of chronic conditions                                                                                                                                                         | Measure of Socioeconomic disadvantage |
|-------------------------|-----------------|--------------|--------------------------------|--------------------------------------------------------------------|------------------------------------------------------------------------------------------------------------------------------------------------------------------------------------|---------------------------------------|
|                         |                 |              |                                |                                                                    | depression, dementia, schizophrenia, and substance                                                                                                                                 |                                       |
| Costa et al. 2020 (39)  | Cross-sectional | Brazil       | Adults aged 20-59 years        | Presence of multimorbidity<br>Cut-off of 2 conditions              | 14 conditions including cardiovascular diseases, metabolic diseases, chronic pulmonary disease, digestive disorders, neurological disorders, cancer, kidney disease and depression | Economic status and education         |
| Kim et al. 2020 (66)    | Longitudinal    | South Korea  | Adults aged 19 years and over  | Presence of multimorbidity<br>Cut-off of 2 conditions              | 28 chronic conditions as listed elsewhere (63)                                                                                                                                     | Household income and education        |
| Moller et al. 2020 (68) | Longitudinal    | Denmark      | People aged 16 years and over  | Multimorbidity patterns or classes (LCA)                           | 47 diseases                                                                                                                                                                        | Education and employment              |
| Odland et al. 2020 (45) | Cross-sectional | Burkina Faso | Adults aged 40 years and older | Presence and patterns of multimorbidity<br>Cut-off of 2 conditions | 11 conditions including: cancer, HIV, chronic respiratory disease, stroke heart disease, hypertension, diabetes, anxiety, depression and dementia/cognitive decline.               | Education and wealth                  |

| Study                   | Study design    | Location    | Population focus               | Assessment of multimorbidity (Presence/Nature/Extent/Both)                                  | List of chronic conditions                                                                                                                                                                                                                                                                                                                                   | Measure of Socioeconomic disadvantage   |
|-------------------------|-----------------|-------------|--------------------------------|---------------------------------------------------------------------------------------------|--------------------------------------------------------------------------------------------------------------------------------------------------------------------------------------------------------------------------------------------------------------------------------------------------------------------------------------------------------------|-----------------------------------------|
| Pati et al. 2020 (46)   | Cross-sectional | India       | Adults aged 18 years and older | Presence of multimorbidity<br>Cut-off of 2 conditions                                       | 21 chronic conditions                                                                                                                                                                                                                                                                                                                                        | Poverty level and education             |
| Zhao et al. 2020 (50)   | Longitudinal    | China       | People aged 50 years and older | Presence of multimorbidity.<br>Cut-off of 2 conditions                                      | Diagnosed                                                                                                                                                                                                                                                                                                                                                    | Annual per-capita household consumption |
| Yidiz et al. 2020 (85)  | Cross-sectional | Netherlands | People aged 18-64 years        | Presence of multimorbidity<br>Cut-off of 2 and 3 conditions most prevalent chronic diseases | List of most prevalent chronic diseases (cardiovascular diseases, psychological disorders, inflammatory conditions and respiratory diseases)                                                                                                                                                                                                                 | Employment status and education         |
| Wister et al. 2020 (82) | Cross-sectional | Canada      | People aged 45-85 years        | Presence of multimorbidity<br>Cut-off of 2 conditions                                       | High blood pressure, osteoarthritis, back problems, cancer, diabetes, heart disease, thyroid dysfunction, lung disease, osteoporosis, urinary incontinence, migraine headaches, irritable bowel syndrome, intestinal and stomach ulcer, glaucoma, peripheral vascular disease, angina, macular degeneration, heart attack, transient ischemic attack, kidney | Vancouver                               |

| Study               | Study design    | Location | Population focus                   | Assessment of multimorbidity (Presence/Nature/Extent/Both)                                              | List of chronic conditions                                                                                                                                                                                                                                                                                       | Measure of Socioeconomic disadvantage     |
|---------------------|-----------------|----------|------------------------------------|---------------------------------------------------------------------------------------------------------|------------------------------------------------------------------------------------------------------------------------------------------------------------------------------------------------------------------------------------------------------------------------------------------------------------------|-------------------------------------------|
|                     |                 |          |                                    |                                                                                                         | disease, rheumatoid arthritis, bowel incontinence, stroke, multiple sclerosis, epilepsy, Parkinson’s disease, as well as dementia and Alzheimer’s disease.                                                                                                                                                       |                                           |
| Vinjerui 2020 (84)  | Cross-sectional | Norway   | People aged 25-100 years           | Complex multimorbidity<br>Three or more diseases involving three or more different body (organ) systems | 51 chronic conditions including following body systems or types: neoplasms; endocrine/nutritional/metabolic; mental/behavioural; eye/adnexa; ear/mastoid; circulatory system; respiratory system; digestive system; skin/subcutaneous tissue; musculoskeletal/ connective tissue and genitourinary systems       | Occupational groups                       |
| Ba et al. 2019 (36) | Cross-sectional | Vietnam  | Individuals aged 15 years and over | Presence of multimorbidity.<br>Cut-off of 2 conditions                                                  | A list of 11 conditions including: cancer, heart and circulatory conditions, chronic joint problems, chronic pulmonary diseases, chronic kidney problems, chronic digestive problems, psychological illness, diabetes, and/or other chronic conditions (such as eye, nose, sore and throat, teeth problems, etc) | Educational level and occupational status |

| Study                     | Study design | Location    | Population focus               | Assessment of multimorbidity (Presence/Nature/Extent/Both)               | List of chronic conditions                                                                                                                                                   | Measure of Socioeconomic disadvantage                                                                                      |
|---------------------------|--------------|-------------|--------------------------------|--------------------------------------------------------------------------|------------------------------------------------------------------------------------------------------------------------------------------------------------------------------|----------------------------------------------------------------------------------------------------------------------------|
| Dugravot et al. 2019 (60) | Longitudinal | UK          | Adults aged 35-55 years        | Presence of multimorbidity<br>Cut-off of 2 and 5 conditions              | 9 conditions including diabetes, coronary heart disease, stroke, chronic obstructive pulmonary disease, depression, arthritis, cancer, dementia and Parkinson's disease      | Occupational position, education.                                                                                          |
| Johnston et al. 2019 (63) | Longitudinal | Scotland    | Adults aged 45 to 51 years     | Presence of multimorbidity<br>Cut-off of 2 conditions                    | Six conditions. List not provided                                                                                                                                            | Father's occupation during childhood. Educational attainment in adulthood                                                  |
| Park et al. 2019 (69)     | Longitudinal | South Korea | Adults aged 50 years and older | Presence and patterns of multimorbidity (LCA)<br>Cut-off of 2 conditions | 10 chronic diseases: hypertension, dyslipidaemia, stroke, osteoarthritis, tuberculosis, asthma, allergic                                                                     | Household income, educational level and occupation                                                                         |
| Russell et al 2019 (55)   | Longitudinal | New Zealand | Age 2 years                    | Presence of multimorbidity<br>Cut-off of 2 conditions                    | Asthma requiring medication, eczema requiring medication, a birth condition, epilepsy, permanent hearing problems, vision problems not correctable with glasses, and obesity | Index constructed from maternal education, employment, financial stress, beneficiary status, housing tenure, overcrowding, |

| Study                               | Study design    | Location    | Population focus              | Assessment of multimorbidity (Presence/Nature/Extent/Both)                                                                      | List of chronic conditions                                                                                                                                                                                         | Measure of Socioeconomic disadvantage                                     |
|-------------------------------------|-----------------|-------------|-------------------------------|---------------------------------------------------------------------------------------------------------------------------------|--------------------------------------------------------------------------------------------------------------------------------------------------------------------------------------------------------------------|---------------------------------------------------------------------------|
|                                     |                 |             |                               |                                                                                                                                 |                                                                                                                                                                                                                    | and residential mobility                                                  |
| Seo 2019 (71)                       | Longitudinal    | South Korea | Working age adults            | Presence of multimorbidity<br>Cut-off of 2 conditions                                                                           | 23 conditions                                                                                                                                                                                                      | Type of employment, income, education                                     |
| Calderon-Larrañaga et al. 2018 (57) | Longitudinal    | Sweden      | Adults aged 60 years and over | Presence of multimorbidity was explored as rapid or slow development of multiple chronic conditions.<br>Cut-off of 2 conditions | List not provided. A disease was considered chronic if it had a long and if residual disability remained or life quality was worsened or long period of care, treatment or rehabilitation was needed.              | Educational level and occupation                                          |
| Costa et al. 2018 (40)              | Cross-sectional | Brazil      | Adults aged 60 years and over | Presence and nature of multimorbidity<br>Cut-off of 2 conditions                                                                | 31 conditions: cardiovascular diseases, metabolic conditions, musculoskeletal conditions, incontinence and constipation, neurological diseases, mental disorders, cancer, respiratory diseases and kidney disease. | Educational level and monthly income per capita (National Economic Index) |

| Study                           | Study design    | Location    | Population focus                                 | Assessment of multimorbidity (Presence/Nature/Extent/Both) | List of chronic conditions                                                                                                                                                                                                            | Measure of Socioeconomic disadvantage                |
|---------------------------------|-----------------|-------------|--------------------------------------------------|------------------------------------------------------------|---------------------------------------------------------------------------------------------------------------------------------------------------------------------------------------------------------------------------------------|------------------------------------------------------|
| Mondor et al. 2018 (80)         | Cross-sectional | Canada      | Adults aged 18 years and older                   | Presence of multimorbidity<br>Cut-off of 2 conditions      | 12 chronic conditions including high blood pressure, diabetes, osteoarthritis, rheumatoid arthritis, heart attack, stroke, cancer, chronic lung disease, hip fracture, Parkinson's disease, Alzheimer's disease, affective disorders. | Household income and educational level inequalities. |
| Stanley et al. 2018 (3)         | Cross-sectional | New Zealand | Adults aged 18 years and older                   | Presence of multimorbidity.<br>Cut-off of 2 conditions     | List of diseases not provided but listed elsewhere (64).                                                                                                                                                                              | Area based measure of socioeconomic deprivation      |
| Stokes et al. 2018 (91)         | Cross-sectional | New Zealand | Pacific and Maori adults aged 35 years and older | Presence of multimorbidity.<br>Cut-off of 2 conditions     | 31 chronic conditions                                                                                                                                                                                                                 | Area based measure of socioeconomic deprivation      |
| Alimohammadian et al. 2017 (35) | Cross-sectional | Iran        | Adults aged 40-75 years                          | Presence of multimorbidity.<br>Cut-off of 2 conditions     | A total of nine conditions were explored: cardiovascular disease, diabetes (type I and II), chronic obstructive pulmonary disease, chronic liver disease, tuberculosis, gastro-oesophageal reflux disease (GORD), and cancers         | Socioeconomic status. Education.                     |
| Canizares et al. 2017 (59)      | Longitudinal    | Canada      | Adults aged 20-69                                | Presence and extent of multimorbidity.                     | 18 chronic conditions were explored: arthritis, back problems, respiratory conditions, allergies                                                                                                                                      | Education, and household income.                     |



| Study                        | Study design    | Location              | Population focus              | Assessment of multimorbidity (Presence/Nature/Extent/Both)        | List of chronic conditions                                                                                                                                                         | Measure of Socioeconomic disadvantage                                 |
|------------------------------|-----------------|-----------------------|-------------------------------|-------------------------------------------------------------------|------------------------------------------------------------------------------------------------------------------------------------------------------------------------------------|-----------------------------------------------------------------------|
|                              |                 |                       |                               | Cut-off of 2 conditions                                           | (excluding food allergies), cardiovascular diseases, diabetes, cancer, ulcers, urinary incontinency, dementia, migraine, glaucoma, and cataracts.                                  |                                                                       |
| Hayek et al. 2017 (61)       | Longitudinal    | Israel                | Adults aged 21 years and over | Presence of multimorbidity.<br>Cut-off of 2 conditions            | 10 conditions were assessed: asthma, arthritis, cancer, diabetes, dyslipidemia, heart attack, hypertension, migraine, osteoporosis, or thyroid disease.                            | Monthly household income and years of schooling                       |
| Katikireddi et al. 2017 (10) | Longitudinal    | Scotland              | Adults aged 35 to 75 years    | Presence and extent of multimorbidity.<br>Cut-off of 2 conditions | 40 conditions                                                                                                                                                                      | Area-based deprivation level.                                         |
| Ki et al. 2017 (65)          | Longitudinal    | South Korea           | Adults aged 30 years and over | Presence and extent of multimorbidity.<br>Cut-off of 2 conditions | 66 chronic conditions.                                                                                                                                                             | Educational attainment, employment status and relative poverty index. |
| Nielsen et al. 2017 (92)     | Cross-sectional | 15 European countries | Adults aged 50 years and over | Presence of multimorbidity.<br>Cut-off of 2 conditions            | 13 chronic conditions: high blood pressure, diabetes, osteoarthritis, rheumatoid arthritis, heart attack, stroke, cancer, chronic lung disease, hip fracture, Parkinson's disease, | Educational level, household income.                                  |

| Study                  | Study design    | Location   | Population focus                | Assessment of multimorbidity (Presence/Nature/Extent/Both) | List of chronic conditions                                                                                                                                                                                                                                                                   | Measure of Socioeconomic disadvantage          |
|------------------------|-----------------|------------|---------------------------------|------------------------------------------------------------|----------------------------------------------------------------------------------------------------------------------------------------------------------------------------------------------------------------------------------------------------------------------------------------------|------------------------------------------------|
|                        |                 |            |                                 |                                                            | Alzheimer's disease, affective disorders.                                                                                                                                                                                                                                                    |                                                |
| Nunes et al. 2017 (12) | Cross-sectional | Brazil     | Adults aged 18 years and over   | Presence of multimorbidity.<br>Cut-off of 2 conditions     | 21 chronic conditions including: cardiovascular diseases, respiratory conditions, mental disorders, musculoskeletal conditions, metabolic disorders, arthritis/rheumatism, cancer, kidney problem.                                                                                           | State level of education and wealth quintiles. |
| Puth et al. 2017 (81)  | Cross-sectional | Germany    | Adults aged 18 years and older  | Presence of multimorbidity<br>Cut-off of 2 conditions      | 15 chronic diseases: hypertension, coronary heart disease, myocardial infarction, chronic heart failure, stroke, diabetes mellitus, bronchial asthma, any type of cancer, hypercholesterolemia, chronic bronchitis, chronic liver disease, arthrosis, osteoporosis, arthritis and depression | Level of education                             |
| Congdon, 2016 (93)     | Cross-sectional | London, UK | Adults aged between 65-75 years | Presence of multimorbidity.<br>Cut-off of 2 conditions     | A list of 15 chronic conditions were assessed: cardiovascular diseases, diabetes, asthma, chronic obstructive pulmonary disease, dementia, depression, serious mental illness (psychosis or bipolar disorder), cancer, and chronic kidney disease.                                           | Area-level socioeconomic deprivation           |

| Study                        | Study design    | Location                               | Population focus            | Assessment of multimorbidity (Presence/Nature/Extent/Both)                                                   | List of chronic conditions                                                                                                                                                                                        | Measure of Socioeconomic disadvantage        |
|------------------------------|-----------------|----------------------------------------|-----------------------------|--------------------------------------------------------------------------------------------------------------|-------------------------------------------------------------------------------------------------------------------------------------------------------------------------------------------------------------------|----------------------------------------------|
| Garin et al. 2016 (43)       | Cross-sectional | 9 low to upper middle-income countries | Adults aged 50 years of age | Presence of multimorbidity.<br><br>Cut-off of 2 conditions                                                   | 9 conditions explored: arthritis, asthma, cataract, chronic obstructive pulmonary disease (COPD), depression, diabetes, edentulism, hypertension, cognitive impairment, obesity, and stroke.                      | Household income, education                  |
| Jackson et al. 2016 (9)      | Longitudinal    | Australia                              | Women aged 45 to 50 years   | Multimorbidity patterns (psychosomatic, musculoskeletal, cardiometabolic, cancer and respiratory syndromes). | 23 conditions examined including cardiovascular diseases, musculoskeletal conditions, respiratory diseases, cancer, allergies, mental conditions, diabetes, impaired glucose tolerance, chronic fatigue syndrome. | Education, occupation and income management. |
| Tomasdottir et al. 2016 (73) | Longitudinal    | Norway                                 | Adults aged 20-59 years     | Presence of multimorbidity.<br><br>Cut-off of 2 conditions                                                   | 17 chronic conditions                                                                                                                                                                                             | Financial hardship (worries)                 |
| Afshar et al. 2015 (34)      | Cross-sectional | 28 Low to middle-income countries      | Adults aged 18 and over     | Presence of multimorbidity.<br><br>Cut-off of 2 conditions                                                   | Seven chronic conditions including: arthritis, angina pectoris, asthma, depression, schizophrenia or psychosis and diabetes.                                                                                      | Level of education.                          |

| Study                            | Study design    | Location | Population focus                  | Assessment of multimorbidity (Presence/Nature/Extent/Both)              | List of chronic conditions                                                                                                                                                                         | Measure of Socioeconomic disadvantage                                             |
|----------------------------------|-----------------|----------|-----------------------------------|-------------------------------------------------------------------------|----------------------------------------------------------------------------------------------------------------------------------------------------------------------------------------------------|-----------------------------------------------------------------------------------|
| Chung et al. 2015 (38)           | Cross-sectional | China    | Adults aged 15 years and older    | Presence and extent of multimorbidity.<br>Cut-off of 2 conditions       | List not provided                                                                                                                                                                                  | Household income, educational attainment, employment status and type of housing.  |
| Diaz et al. 2015 (94)            | Cross-sectional | Norway   | Immigrants aged 15 years and over | Presence of multimorbidity.<br>Cut-off of 2 conditions                  | List not provided                                                                                                                                                                                  | Personal income level. Reason for migration.                                      |
| Prazeres and Santiago, 2015 (95) | Cross-sectional | Portugal | Adults aged 18 years and older    | Extent and presence of multimorbidity.<br>Cut-off of 2 and 3 conditions | List not provided                                                                                                                                                                                  | Years of educations, professional status and self-perceived Socioeconomic status. |
| Roberts et al. 2015 (96)         | Cross-sectional | Canada   | Adults aged 20 years and older    | Presence and extent of multimorbidity<br>Cut-off of 2 or 3 conditions   | A list of 9 conditions including arthritis, mood disorder and/or anxiety, asthma, diabetes mellitus, heart disease, chronic obstructive pulmonary disease, cancer, stroke, and Alzheimer's disease | Educational level and household income                                            |

| Study                    | Study design    | Location | Population focus                                      | Assessment of multimorbidity (Presence/Nature/Extent/Both)                                                                                   | List of chronic conditions                                                                                                                                                                                                                                                                    | Measure of Socioeconomic disadvantage                                                         |
|--------------------------|-----------------|----------|-------------------------------------------------------|----------------------------------------------------------------------------------------------------------------------------------------------|-----------------------------------------------------------------------------------------------------------------------------------------------------------------------------------------------------------------------------------------------------------------------------------------------|-----------------------------------------------------------------------------------------------|
| Banjare et al. 2014 (37) | Cross-sectional | India    | Adults aged over 60 years                             | Extent of multimorbidity (no morbidity, one morbidity, two morbidities and three or more morbidities)                                        | 23 chronic conditions were assessed: musculoskeletal conditions, cardiovascular disease, respiratory conditions, neurological disorders, severe dental conditions, kidney or renal disorders, depression, liver or gall bladder illness, accidental injury, injury due to fall, skin disease. | Education, state of economic independence, quintiles of wealth, living arrangement and caste. |
| Habib et al. 2014 (44)   | Cross-sectional | Lebanon  | Palestinian refugees aged between 14 and 87 years old | Presence and extent of multimorbidity.<br>Cut-off of 2 conditions                                                                            | List not provided                                                                                                                                                                                                                                                                             | Educational attainment, wealth index.                                                         |
| McLean et al. 2014 (78)  | Cross-sectional | Scotland | Adults aged 25 years and over                         | Presence and pattern of multimorbidity (physical only, mental only and mixed physical and mental multimorbidity).<br>Cut-off of 2 conditions | A list of 35 physical and 8 mental conditions were included but not specified on the paper.                                                                                                                                                                                                   | Area-based deprivation.                                                                       |
| Violan et al. 2014 (97)  | Cross-sectional | Spain    | Adults aged 19                                        | Presence of multimorbidity.                                                                                                                  | 31 chronic conditions                                                                                                                                                                                                                                                                         | Area-level of deprivation                                                                     |

| Study                       | Study design    | Location     | Population focus            | Assessment of multimorbidity (Presence/Nature/Extent/Both)        | List of chronic conditions                                                                                                                   | Measure of Socioeconomic disadvantage                                                                                                           |
|-----------------------------|-----------------|--------------|-----------------------------|-------------------------------------------------------------------|----------------------------------------------------------------------------------------------------------------------------------------------|-------------------------------------------------------------------------------------------------------------------------------------------------|
|                             |                 |              | years and older             | Cut-off of 2 conditions                                           |                                                                                                                                              |                                                                                                                                                 |
| Alaba et al. 2013 (51)      | Cross-sectional | South Africa | Adults aged 18 and over     | Presence or absence of multimorbidity.<br>Cut-off of 2            | Eight chronic conditions were assessed including tuberculosis, high blood pressure, diabetes or high blood sugar, stroke, asthma and cancer. | Years of schooling, household income, social assistance, employment.                                                                            |
| Cornish et al. 2013 (54)    | Longitudinal    | Bristol, UK  | Children aged 0 to 18 years | Presence and extent of multimorbidity.<br>Cut-off of 2 conditions | As listed in the Johns Hopkins University Adjusted Clinical Groups (ACG) System                                                              | Parent's educational level. Occupational social class. Housing tenure. Family adversity index during pregnancy. Area socioeconomic deprivation. |
| Demirchyan et al. 2013 (42) | Longitudinal    | Armenia      | Adults aged 37 to 90 years  | Presence of multimorbidity.<br>Cut-off of 2 conditions            | List not provided                                                                                                                            | Education, perceived low affordability of healthcare services and perceived living standards.                                                   |

| Study                         | Study design    | Location     | Population focus               | Assessment of multimorbidity (Presence/Nature/Extent/Both)                                                                                                          | List of chronic conditions                                                                                                                                                                                | Measure of Socioeconomic disadvantage                         |
|-------------------------------|-----------------|--------------|--------------------------------|---------------------------------------------------------------------------------------------------------------------------------------------------------------------|-----------------------------------------------------------------------------------------------------------------------------------------------------------------------------------------------------------|---------------------------------------------------------------|
| Weiman et al. 2016 (49)       | Cross-sectional | South Africa | People aged 15 years and older | Presence of multimorbidity.<br>Cut-off of 2 conditions                                                                                                              | List not provided                                                                                                                                                                                         | Multidimensional poverty index                                |
| Agborsangaya et al. 2012 (86) | Cross-sectional | Canada       | Adults aged 18 and over        | Presence of multimorbidity.<br>Cut-off of 2 conditions                                                                                                              | >16 chronic conditions explored, including diabetes, respiratory conditions, cardiovascular diseases, depression or anxiety, chronic pain, arthritis, gastrointestinal tract disease and kidney diseases. | Educational level and annual household income.                |
| Barnett et al. 2012 (53)      | Cross-sectional | UK           | Individuals from all ages      | Presence of multimorbidity<br>Cut-off of 2 conditions                                                                                                               | 40 chronic conditions                                                                                                                                                                                     | Area level deprivation                                        |
| Schäfer et al. 2012 (70)      | Longitudinal    | Germany      | Adults aged 65 years and older | Presence and patterns of multimorbidity (cardiometabolic disorders (CMD) and anxiety, depression, somatoform disorders and pain (ADS/P))<br>Cut-off of 3 conditions | 29 chronic conditions                                                                                                                                                                                     | Education, autonomy on former occupation and household income |

| Study                          | Study design | Location      | Population focus              | Assessment of multimorbidity (Presence/Nature/Extent/Both)            | List of chronic conditions                                                                      | Measure of Socioeconomic disadvantage                                                                                                                |
|--------------------------------|--------------|---------------|-------------------------------|-----------------------------------------------------------------------|-------------------------------------------------------------------------------------------------|------------------------------------------------------------------------------------------------------------------------------------------------------|
| Tucker-Seeley et al. 2011 (74) | Longitudinal | United States | Adults aged 50 years and over | Presence and extent of multimorbidity.<br>Count of chronic conditions | Six chronic conditions: cancer, heart disease, lung disease, stroke, diabetes, and hypertension | Childhood financial hardship (yes/no). Average lifetime earnings during young and middle adulthood. Educational attainment as indicator of adult SES |



Table 3. Types of theories and context of application

| Study*                                      | Theoretical application | Materialist | Behavioural | Psychosocial | Social capital | Life course | Neo-liberal |
|---------------------------------------------|-------------------------|-------------|-------------|--------------|----------------|-------------|-------------|
| Vidyashree et al 2021 <sup>b</sup>          |                         | ✓           |             |              | ✓              |             |             |
| Singh 2021 <sup>a</sup>                     | Theory tested           | ✓           | ✓           | ✓            | ✓              |             |             |
| Hone et al. 2021 <sup>b</sup>               |                         | ✓           | ✓           | ✓            |                |             |             |
| Hernandez et al. 2021 <sup>b</sup>          |                         |             |             |              |                |             | ✓           |
| Khanolkar et al. 2021 <sup>a</sup>          |                         |             |             |              |                | ✓           |             |
| Craig et al. 2021 <sup>a</sup>              |                         | ✓           | ✓           |              |                |             |             |
| Andersen 2021 <sup>b</sup>                  |                         |             | ✓           |              |                |             |             |
| Zhao et al. 2020 <sup>b</sup>               |                         | ✓           |             |              |                |             |             |
| Yidiz et al. 2020 <sup>a,b</sup>            |                         | ✓           |             | ✓            | ✓              |             |             |
| Wister et al. 2020 <sup>a,b</sup>           |                         | ✓           | ✓           | ✓            |                |             |             |
| Vinjerui 2020 <sup>a,b</sup>                |                         | ✓           |             | ✓            | ✓              |             |             |
| Chamberlain 2020 <sup>b</sup>               |                         | ✓           |             |              |                |             |             |
| Odland et al. 2020 <sup>b</sup>             |                         | ✓           |             |              |                |             |             |
| Pati et al. 2020 <sup>b</sup>               |                         | ✓           | ✓           |              |                |             |             |
| Russell et al 2019 <sup>b</sup>             |                         |             |             |              |                | ✓           |             |
| Seo 2019 <sup>b</sup>                       |                         | ✓           | ✓           |              |                |             |             |
| Johnston et al. 2019 <sup>a</sup>           | Theory tested           |             |             |              |                | ✓           |             |
| Calderon-Larrañaga et al. 2018 <sup>a</sup> |                         |             |             | ✓            |                |             |             |

| Study*                                  | Theoretical application | Materialist | Behavioural | Psychosocial | Social capital | Life course | Neo-liberal |
|-----------------------------------------|-------------------------|-------------|-------------|--------------|----------------|-------------|-------------|
| Mondor et al. 2018 <sup>a</sup>         | Theory tested           |             | ✓           |              |                |             |             |
| Alimohammadian et al. 2017 <sup>a</sup> |                         |             | ✓           |              |                |             |             |
| Katikireddi et al. 2017 <sup>a</sup>    | Theory tested           |             | ✓           |              |                | ✓           |             |
| Tomasdottir et al. 2016 <sup>a</sup>    |                         |             |             | ✓            |                |             |             |
| Chung et al. 2015 <sup>a</sup>          | Theory tested           | ✓           | ✓           |              |                |             |             |
| Barnett 2012 <sup>b</sup>               |                         |             | ✓           |              |                |             |             |
| Agborsangaya et al. 2012 <sup>a</sup>   |                         |             |             | ✓            |                |             |             |
| Tucker-Seeley et al. 2011 <sup>a</sup>  |                         | ✓           |             |              |                | ✓           |             |
| Costa et al. 2018 <sup>b</sup>          |                         |             | ✓           |              |                |             |             |
| Canizares et al. 2017 <sup>b</sup>      |                         |             | ✓           |              |                |             |             |
| Puth et al. 2017 <sup>b</sup>           |                         |             | ✓           |              |                |             |             |
| Afshar et al. 2015 <sup>b</sup>         |                         |             | ✓           | ✓            |                |             |             |
| Banjare et al. 2014 <sup>b</sup>        |                         |             | ✓           |              |                |             |             |
| Alaba et al. 2013 <sup>b</sup>          |                         |             | ✓           | ✓            | ✓              |             |             |
| Demirchyan et al. 2013 <sup>b</sup>     |                         | ✓           | ✓           | ✓            |                |             |             |

Notes: \* Restricted to studies with identified use of theories.

<sup>a</sup> Specific theory was explicitly mentioned by the authors

<sup>b</sup> Theory was identified and inferred by the reviewers

<sup>ab</sup> One or more theories were explicitly mentioned but one or more identified and inferred by the reviewers

PRISMA flow diagram

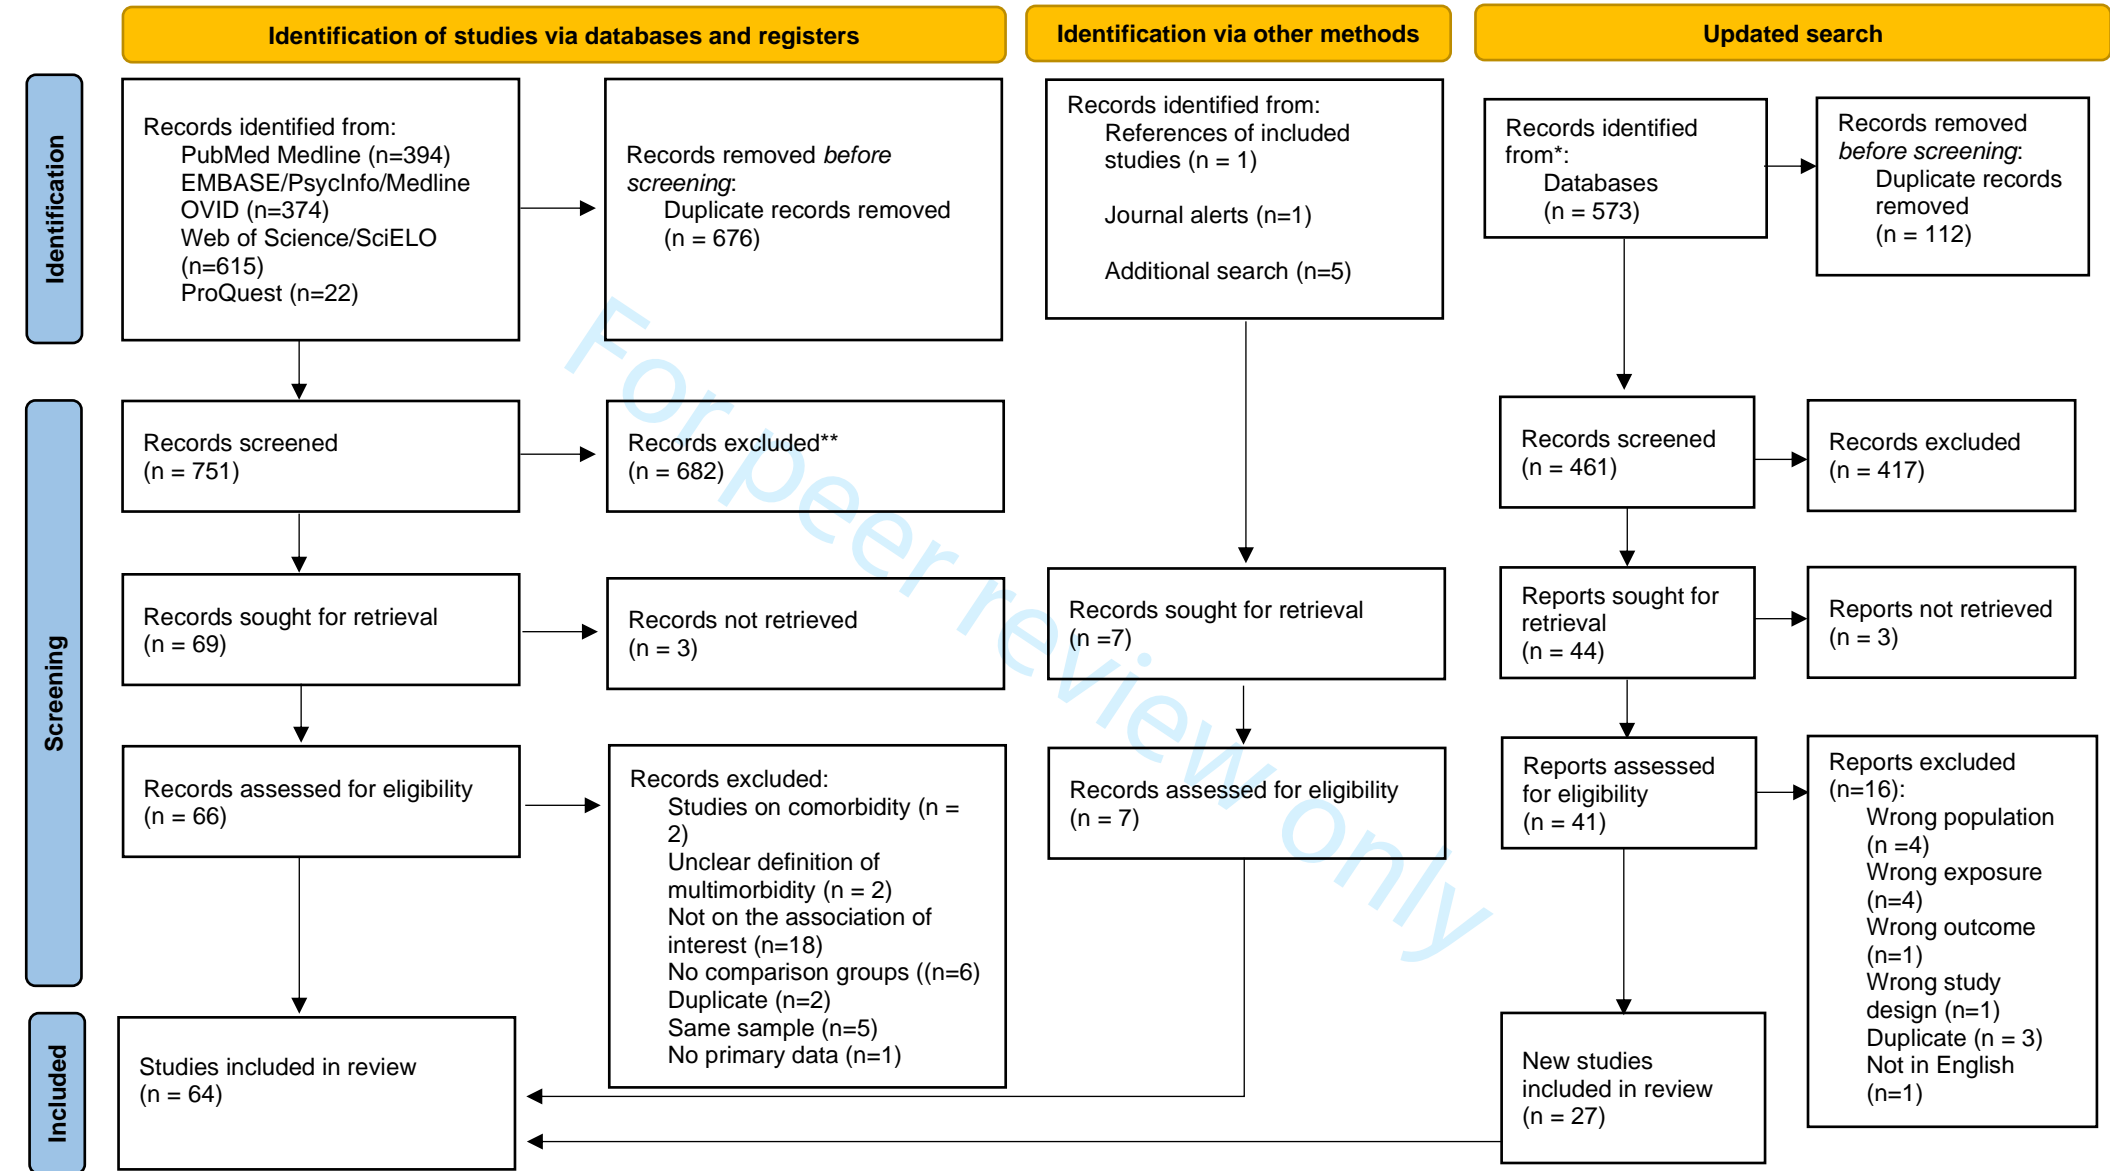

## Appendices

### Contents

|                                                                             |    |
|-----------------------------------------------------------------------------|----|
| Appendix 1. Detailed search strategy according to electronic databases..... | 2  |
| MEDLINE.....                                                                | 2  |
| WEB OF SCIENCE.....                                                         | 6  |
| PUBMED.....                                                                 | 8  |
| Appendix 2. Reasons for exclusion of studies after full-text review .....   | 11 |
| References.....                                                             | 12 |

For peer review only

## Appendix 1. Detailed search strategy according to electronic databases

### MEDLINE

| Outcome                                                                                                    | Exposure                                                                                                                                                                                                                                                                                                                                                                                                                                                                                                                                                      | Phenomenon                                                                                                                                                                                                                                                                                                                                                                                                                             |
|------------------------------------------------------------------------------------------------------------|---------------------------------------------------------------------------------------------------------------------------------------------------------------------------------------------------------------------------------------------------------------------------------------------------------------------------------------------------------------------------------------------------------------------------------------------------------------------------------------------------------------------------------------------------------------|----------------------------------------------------------------------------------------------------------------------------------------------------------------------------------------------------------------------------------------------------------------------------------------------------------------------------------------------------------------------------------------------------------------------------------------|
| (multimorb\$ or multi?morb\$<br>or<br>multiple chronic conditions\$ or<br>multiple chronic diseases\$).ti. | Psychosocial Deprivation* .ti. OR<br>OR<br>exp Family characteristics/ OR<br>exp Hierarchy, Social/ OR<br>Social Hierarch* .ti. OR<br>Minority Group* .ti. OR<br>exp Social Class/ OR<br>Social class* .ti. OR<br>Social Mobilit* .ti. OR<br>Caste* .ti. OR<br>Social Condition* .ti. OR<br>exp Sociology/ OR<br>Poverty .ti. OR<br>exp Socioeconomic Factors/ OR<br>Socioeconomic* .ti. OR<br>Salary .ti. OR<br>Salaries .ti. OR<br>Income* .ti. OR<br>Wage* .ti. OR<br>Remuneration* .ti. OR<br>Occupation* .ti. OR<br>Unemploy* .ti. OR<br>Labour* .ti. OR | Inequalit*.ab. OR<br>Unequal*.ab. OR<br>Disparit* .ab. OR<br>Inequit* .ab. OR<br>Difference* .ab. OR<br>Different*.ab. OR<br>Discriminat* .ab. OR<br>Marginali*.ab OR<br>Marginali*.ti OR<br>Depriv* .ab. OR<br>Inequalit*.ti. OR<br>Disparit* .ti. OR<br>Inequit* .ti. OR<br>Difference* .ti. OR<br>Discriminat* .ti. OR<br>Depriv* .ti. OR<br>Disadvantage*.ti. OR<br>Disadvantage*.ab.<br>OR<br>Vulnerab*.ab<br>OR<br>Vulnerab*.ti. |

|    |  |                                |  |
|----|--|--------------------------------|--|
| 1  |  | Labor* .ti. OR                 |  |
| 2  |  |                                |  |
| 3  |  | Employment* .ti OR             |  |
| 4  |  |                                |  |
| 5  |  | Employment* .ab OR             |  |
| 6  |  |                                |  |
| 7  |  | Educational Status.ti. OR      |  |
| 8  |  |                                |  |
| 9  |  | Educational Achievement*.ti.   |  |
| 10 |  | OR                             |  |
| 11 |  | Educational level*.ti OR       |  |
| 12 |  |                                |  |
| 13 |  | Educational level*.ab OR       |  |
| 14 |  |                                |  |
| 15 |  | Educational attainment .ti OR  |  |
| 16 |  |                                |  |
| 17 |  | Educational attainment .ab OR  |  |
| 18 |  |                                |  |
| 19 |  | exp Ethnic Groups/ OR          |  |
| 20 |  |                                |  |
| 21 |  | Ethnic* .ti. OR                |  |
| 22 |  |                                |  |
| 23 |  | Race* .ti. OR                  |  |
| 24 |  |                                |  |
| 25 |  | Raci* .ti. OR                  |  |
| 26 |  |                                |  |
| 27 |  | exp Sexism/ OR                 |  |
| 28 |  |                                |  |
| 29 |  | Sexis* .ti. OR                 |  |
| 30 |  |                                |  |
| 31 |  | exp Gender Identity/ OR        |  |
| 32 |  |                                |  |
| 33 |  | Gender* .ti. OR                |  |
| 34 |  |                                |  |
| 35 |  | Social Capital* .ti. OR        |  |
| 36 |  |                                |  |
| 37 |  | Neomaterial* .ti.              |  |
| 38 |  |                                |  |
| 39 |  | OR                             |  |
| 40 |  |                                |  |
| 41 |  | Social Cohesi* .ti. OR         |  |
| 42 |  |                                |  |
| 43 |  | Maternalis* .ti. OR            |  |
| 44 |  |                                |  |
| 45 |  | Psychosocial Deprivation* .ab. |  |
| 46 |  | OR                             |  |
| 47 |  |                                |  |
| 48 |  | Social Hierarch* .ab. OR       |  |
| 49 |  |                                |  |
| 50 |  | Minority Group* .ab. OR        |  |
| 51 |  |                                |  |
| 52 |  |                                |  |
| 53 |  |                                |  |
| 54 |  |                                |  |
| 55 |  |                                |  |
| 56 |  |                                |  |
| 57 |  |                                |  |
| 58 |  |                                |  |
| 59 |  |                                |  |
| 60 |  |                                |  |

1  
2  
3  
4  
5  
6  
7  
8  
9  
10  
11  
12  
13  
14  
15  
16  
17  
18  
19  
20  
21  
22  
23  
24  
25  
26  
27  
28  
29  
30  
31  
32  
33  
34  
35  
36  
37  
38  
39  
40  
41  
42  
43  
44  
45  
46  
47  
48  
49  
50  
51  
52  
53  
54  
55  
56  
57  
58  
59  
60

|  |                                                                                                                                                                                                                                                                                                                                                                                                                                                                                                                                                                                                                                                                                          |  |
|--|------------------------------------------------------------------------------------------------------------------------------------------------------------------------------------------------------------------------------------------------------------------------------------------------------------------------------------------------------------------------------------------------------------------------------------------------------------------------------------------------------------------------------------------------------------------------------------------------------------------------------------------------------------------------------------------|--|
|  | <p>Social class* .ab. OR</p> <p>Social Mobilit* .ab. OR</p> <p>Caste* .ab. OR</p> <p>Social Condition* .ab. OR</p> <p>Poverty .ab. OR</p> <p>Socioeconomic*.ab. OR</p> <p>Salary .ab. OR</p> <p>Salaries .ab. OR</p> <p>Income* .ab. OR</p> <p>Wage* .ab. OR</p> <p>Remuneration* .ab. OR</p> <p>Occupation* .ab. OR</p> <p>Unemploy* .ab. OR</p> <p>Labour* .ab. OR</p> <p>Labor* .ab. OR</p> <p>Educational Status.ab. OR</p> <p>Educational Achievement*.ab.<br/>OR</p> <p>Ethnic* .ab. OR</p> <p>Race* .ab. OR</p> <p>Raci* .ab. OR</p> <p>Sexis* .ab. OR</p> <p>Gender* .ab. OR</p> <p>Social Capital* .ab. OR</p> <p>Neomaterial* .ab.</p> <p>OR</p> <p>Social Cohesi* .ab. OR</p> |  |
|--|------------------------------------------------------------------------------------------------------------------------------------------------------------------------------------------------------------------------------------------------------------------------------------------------------------------------------------------------------------------------------------------------------------------------------------------------------------------------------------------------------------------------------------------------------------------------------------------------------------------------------------------------------------------------------------------|--|

1  
2  
3  
4  
5  
6  
7  
8  
9  
10  
11  
12  
13  
14  
15  
16  
17  
18  
19  
20  
21  
22  
23  
24  
25  
26  
27  
28  
29  
30  
31  
32  
33  
34  
35  
36  
37  
38  
39  
40  
41  
42  
43  
44  
45  
46  
47  
48  
49  
50  
51  
52  
53  
54  
55  
56  
57  
58  
59  
60

|  |                                          |  |
|--|------------------------------------------|--|
|  | Materialis* .ab. OR<br>Neomaterial* .ab. |  |
|--|------------------------------------------|--|

For peer review only



## WEB OF SCIENCE

| Outcome                                                                                                      | Exposure                                                                                                                                                                                                                                                                                                                                                                                                                                                                                            | Phenomenon                                                                                                                                                                                 |
|--------------------------------------------------------------------------------------------------------------|-----------------------------------------------------------------------------------------------------------------------------------------------------------------------------------------------------------------------------------------------------------------------------------------------------------------------------------------------------------------------------------------------------------------------------------------------------------------------------------------------------|--------------------------------------------------------------------------------------------------------------------------------------------------------------------------------------------|
| TS = (multimorb* OR<br>multi-morb* OR “multiple<br>chronic condition*” OR<br>“multiple chronic<br>disease*”) | TS = (“Psychosocial<br>Deprivation*” OR<br>“Family characteristics” OR<br>“Social Hierarch*” OR<br>“Minority Group*” OR<br>“Social Class” OR<br>“Social Mobilit*” OR<br>Caste* OR<br>“Social Condition*” OR<br>Sociology OR<br>Poverty. OR<br>“Socioeconomic Factors” OR<br>Socioeconomic* OR<br>Salary OR<br>Salaries OR<br>Income* OR<br>Wage* OR<br>Remuneration* OR<br>Occupation* OR<br>Unemploy* OR<br>Labour* OR<br>Labor* OR<br>Employment* OR<br>Employment* OR<br>“Educational Status” OR | TS = ( Inequalit* OR<br>Unequal* OR<br>Disparit* OR<br>Inequit* OR<br>Difference* OR<br>Different* OR<br>Discriminat* OR<br>Marginali* OR<br>Depriv* OR<br>Disadvantage* OR<br>Vulnerab* ) |

|  |                                                                                                                                                                                                                                                                                                                                                                                                                        |  |
|--|------------------------------------------------------------------------------------------------------------------------------------------------------------------------------------------------------------------------------------------------------------------------------------------------------------------------------------------------------------------------------------------------------------------------|--|
|  | <p>“Educational Achievement*” OR</p> <p>“Educational level*” OR</p> <p>“Educational attainment” OR</p> <p>“Ethnic Groups” OR</p> <p>Ethnic* OR</p> <p>Race* OR</p> <p>Raci* OR</p> <p>Sexism OR</p> <p>Sexis* OR</p> <p>“Gender Identity” OR</p> <p>Gender* OR</p> <p>“Social Capital*” OR</p> <p>“Social Cohesi*” OR</p> <p>Materalis* OR</p> <p>Neomaterial*</p> <p>OR</p> <p>Materalis* OR</p> <p>Neomaterial*)</p> |  |
|--|------------------------------------------------------------------------------------------------------------------------------------------------------------------------------------------------------------------------------------------------------------------------------------------------------------------------------------------------------------------------------------------------------------------------|--|

## PUBMED

| Outcome                                                                                                                                                                                      | Exposure                                                                                                                                                                                                                                                                                                                                                                                                                                                                                                                                                                                                    | Phenomenon                                                                                                                                                                                                                                          |
|----------------------------------------------------------------------------------------------------------------------------------------------------------------------------------------------|-------------------------------------------------------------------------------------------------------------------------------------------------------------------------------------------------------------------------------------------------------------------------------------------------------------------------------------------------------------------------------------------------------------------------------------------------------------------------------------------------------------------------------------------------------------------------------------------------------------|-----------------------------------------------------------------------------------------------------------------------------------------------------------------------------------------------------------------------------------------------------|
| multimorb*[TIAB] OR<br>multimorbidity[MH] OR<br>multi-morb*[TIAB] OR<br>multiple chronic<br>condition*[TIAB] OR<br>multiple chronic<br>disease*[TIAB] OR<br>multiple chronic disease<br>[MH] | Psychosocial<br>Deprivation*[TIAB] OR<br>Family characteristics [TIAB]<br>OR<br>Social Hierarch*[TIAB] OR<br>Minority Group*[TIAB] OR<br>Social Class[TIAB] OR<br>Social Mobilit*[TIAB] OR<br>Caste*[TIAB] OR<br>Social Condition*[TIAB] OR<br>Sociology[TIAB] OR<br>Poverty [TIAB] OR<br>Socioeconomic Factors[TIAB]<br>OR<br>Socioeconomic*[TIAB] OR<br>Salary[TIAB] OR<br>Salaries[TIAB] OR<br>Income*[TIAB] OR<br>Wage*[TIAB] OR<br>Remuneration*[TIAB] OR<br>Occupation*[TIAB] OR<br>Unemploy*[TIAB] OR<br>Labour*[TIAB] OR<br>Labor*[TIAB] OR<br>Employment*[TIAB] OR<br>Educational Status [TIAB] OR | Inequalit*[TIAB] OR<br>Unequal*[TIAB] OR<br>Disparit*[TIAB] OR<br>Inequit*[TIAB] OR<br>Difference*[TIAB] OR<br>Different*[TIAB] OR<br>Discriminat*[TIAB] OR<br>Marginali*[TIAB] OR<br>Depriv*[TIAB] OR<br>Disadvantage*[TIAB] OR<br>Vulnerab*[TIAB] |

|  |                                                                                                                                                                                                                                                                                                                                                                                                                                                                                                                    |  |
|--|--------------------------------------------------------------------------------------------------------------------------------------------------------------------------------------------------------------------------------------------------------------------------------------------------------------------------------------------------------------------------------------------------------------------------------------------------------------------------------------------------------------------|--|
|  | <p>Educational Achievement*[TIAB] OR</p> <p>Educational level*[TIAB] OR</p> <p>Educational attainment [TIAB] OR</p> <p>Ethnic Groups[TIAB] OR</p> <p>Ethnic*[TIAB] OR</p> <p>Race*[TIAB] OR</p> <p>Raci*[TIAB] OR</p> <p>Sexism[TIAB] OR</p> <p>Sexis*[TIAB] OR</p> <p>“Gender Identity”[TIAB] OR</p> <p>Gender*[TIAB] OR</p> <p>Social Capital*[TIAB] OR</p> <p>Social Cohesi*[TIAB] OR</p> <p>Materialis*[TIAB] OR</p> <p>Neomaterial*[TIAB]</p> <p>OR</p> <p>Materialis*[TIAB] OR</p> <p>Neomaterial*[TIAB]</p> |  |
|--|--------------------------------------------------------------------------------------------------------------------------------------------------------------------------------------------------------------------------------------------------------------------------------------------------------------------------------------------------------------------------------------------------------------------------------------------------------------------------------------------------------------------|--|

**PROQUEST** (Applied Social Sciences/ERIC/Humanities Index/ProQuest Central/ProQuest dissertation and Thesis Global/Sociological Abstracts)

multimorb\* OR multi-morb\* OR “multiple chronic condition\*” OR “multiple chronic diseases\*”

AND

“Psychosocial Deprivation\*” OR “Family characteristics” OR “Social Hierarch\*” OR “Minority Group\*” OR “Social Class” OR “Social Mobilit\*” OR Caste\* OR “Social Condition\*” OR Sociology OR Poverty. OR “Socioeconomic Factors” OR Socioeconomic\* OR Salary OR Salaries OR Income\* OR Wage\* OR Remuneration\* OR Occupation\* OR

1  
2  
3 Unemploy\* OR Labour\* OR Labor\* OR Employment\* OR Employment\* OR “Educational  
4 Status” OR “Educational Achievement\*” OR “Educational level\*” OR “Educational  
5 attainment” OR “Ethnic Groups” OR Ethnic\* OR Race\* OR Raci\* OR Sexism OR Saxis\*  
6 OR “Gender Identity” OR Gender\* OR “Social Capital\*” OR “Social Cohesi\*” OR  
7 Materialis\* OR Neomaterial\* OR Materalis\* OR Neomaterial\*  
8  
9

10 AND  
11

12 Inequalit\* OR Unequal\* OR Disparit\* OR Inequit\* OR Difference\* OR Different\* OR  
13 Discriminat\* OR Marginali\* OR Depriv\* OR Disadvantage\* ORVulnerab\*  
14  
15  
16  
17  
18  
19  
20  
21  
22  
23  
24  
25  
26  
27  
28  
29  
30  
31  
32  
33  
34  
35  
36  
37  
38  
39  
40  
41  
42  
43  
44  
45  
46  
47  
48  
49  
50  
51  
52  
53  
54  
55  
56  
57  
58  
59  
60

## Appendix 2. Reasons for exclusion of studies after full-text review

**Comorbidity** Barnett, Mercer (1), Gallacher, McQueenie (2), Alonso-Moran, Orueta (3)

**Unclear definition of multimorbidity** Chau, Baumann (4), Reis-Santos, Gomes (5)

**Did not explore the association between socioeconomic disadvantage and multimorbidity** Charlton, Rudisill (6), Galenkamp, Gagliardi (7), Golinowska, Sowa (8), Jessen, Pallesen (9), Koroukian, Schiltz (10), Mujica-Mota, Roberts (11), Orueta, Garcia-Alvarez (12), Phaswana-Mafuya, Peltzer (13), Rodrigues, Gregorio (14), Thavorn, Maxwell (15), Tran, Kiran (16), van den Akker, Buntinx (17), Wang, Wang (18), Ward (19), Woo and Leung (20), Cassell, Edwards (21), Brinda, Attermann (22), Kone, Mondor (23)

**Absence of comparative group** Eakin, Bull (24), Frakes, Brownie (25), Kangovi, Mitra (26), Leiser, Deruaz-Luyetl (27), Smith, Ferede (28), von dem Knesebeck, Bickel (29)

**Full-text unavailable** Jantz (30), Pati and Swain (31), Russel, Grant (32), Cezard, Keenan (33), Zou, Wang (34)

**Duplicate** Myung, Yo Han (35), Srinivasa Vittal, Skivington (36), Aminisani, Stephens (37), Chamberlain, Rutten (38), Pati, Swain (39)

**Use of the same sample** Ahmadi, Alimohammadian (40), Ataguba (41), Kunna, Miguel San (42), Nunes, Thume (43), Habib, Mikati (44)

**No primary data** Shadmi (45)

**Not in English** Melo and Lima (46)

**Not peer-reviewed** Korea National Health & Nutrition Survey (47)

**Wrong exposure** Basham (48), Douglas, Vinjerui (49), Guimaraes and Andrade (50), Harrison, Britt (51)

**Wrong outcome** Kivimaki, Batty (52)

**Wrong population** Calderon-Larranaga, Marengoni (53), Carrilero, Dalmau-Bueno (54), Shang, Peng (55), Vinjerui, Boeckxstaens (56)

## References

1. Barnett K, Mercer SW, Norbury M, Watt G, Wyke S, Guthrie B. Epidemiology of multimorbidity and implications for health care, research, and medical education: a cross-sectional study. *Lancet (London, England)*. 2012;380(9836):37-43.
2. Gallacher KI, McQueenie R, Nicholl B, Jani BD, Lee D, Mair FS. Risk factors and mortality associated with multimorbidity in people with stroke or transient ischaemic attack: a study of 8,751 UK Biobank participants. *Journal of comorbidity*. 2018;8(1):1-8.
3. Alonso-Moran E, Orueta JF, Fraile Esteban JI, Arteagoitia Axpe JM, Luz Marques Gonzalez M, Toro Polanco N, et al. Multimorbidity in people with type 2 diabetes in the Basque Country (Spain): Prevalence, comorbidity clusters and comparison with other chronic patients. *European Journal of Internal Medicine*. 2015;26(3):197-202.
4. Chau K, Baumann M, Chau N. Socioeconomic inequities patterns of multi-morbidity in early adolescence. *International journal for equity in health*. 2013;12:65.
5. Reis-Santos B, Gomes T, Macedo LR, Horta BL, Riley LW, Maciel EL. Prevalence and patterns of multimorbidity among tuberculosis patients in Brazil: a cross-sectional study. *International journal for equity in health*. 2013;12:61.
6. Charlton J, Rudisill C, Bhattarai N, Gulliford M. Impact of deprivation on occurrence, outcomes and health care costs of people with multiple morbidity. *Journal of Health Services Research & Policy*. 2013;18(4):215-23.
7. Galenkamp H, Gagliardi C, Principi A, Golinowska S, Moreira A, Schmidt AE, et al. Predictors of social leisure activities in older Europeans with and without multimorbidity. *European Journal of Ageing*. 2016;13(2):129-43.
8. Golinowska S, Sowa A, Deeg D, Socci M, Principi A, Rodrigues R, et al. Participation in formal learning activities of older Europeans in poor and good health. *Eur J Ageing*. 2016;13:115-27.
9. Jessen MAB, Pallesen AVJ, Kriegbaum M, Kristiansen M. The association between loneliness and health - a survey-based study among middle-aged and older adults in Denmark. *Ageing & mental health*. 2017:1-6.
10. Koroukian SM, Schiltz NK, Warner DF, Given CW, Schluchter M, Owusu C, et al. Social determinants, multimorbidity, and patterns of end-of-life care in older adults dying from cancer. *Journal of Geriatric Oncology*. 2017;8(2):117-24.
11. Mujica-Mota RE, Roberts M, Abel G, Elliott M, Lyratzopoulos G, Roland M, et al. Common patterns of morbidity and multi-morbidity and their impact on health-related quality of life: evidence from a national survey. *Quality of life research : an international journal of quality of life aspects of treatment, care and rehabilitation*. 2015;24(4):909-18.
12. Orueta JF, Garcia-Alvarez A, Garcia-Goni M, Paolucci F, Nuno-Solinis R. Prevalence and costs of multimorbidity by deprivation levels in the basque country: a population based study using health administrative databases. *PLoS One*. 2014;9(2):e89787.
13. Phaswana-Mafuya N, Peltzer K, Chirinda W, Musekiwa A, Kose Z, Hoosain E, et al. Self-reported prevalence of chronic non-communicable diseases and associated factors among older adults in South Africa. *Glob Health Action*. 2013;6:20936.
14. Rodrigues AM, Gregorio MJ, Sousa RD, Dias SS, Santos MJ, Mendes JM, et al. Challenges of Ageing in Portugal: Data from the EpiDoC Cohort. *Acta medica portuguesa*. 2018;31(2):80-93.
15. Thavorn K, Maxwell CJ, Gruneir A, Bronskill SE, Bai Y, Kone Pefoyo AJ, et al. Effect of socio-demographic factors on the association between multimorbidity and healthcare costs: a population-based, retrospective cohort study. *BMJ open*. 2017;7(10):e017264.
16. Tran J, Kiran A, Rahimi K. Prevalence of multimorbidity of cardio-metabolic disease in the United Kingdom. *European Heart Journal*. 2016;37 (Supplement 1):742.
17. van den Akker M, Buntinx F, Metsemakers JF, Knottnerus J. Marginal impact of psychosocial factors on multimorbidity: Results of an explorative nested case-control study. *Social Science & Medicine*. 2000;50(11):1679-93.
18. Wang HH, Wang JJ, Lawson KD, Wong SY, Wong MC, Li FJ, et al. Relationships of multimorbidity and income with hospital admissions in 3 health care systems. *Annals of family medicine*. 2015;13(2):164-7.



19. Ward BW. Multiple chronic conditions and labor force outcomes: A population study of U.S. adults. *American journal of industrial medicine*. 2015;58(9):943-54.
20. Woo J, Leung J. Multi-morbidity, dependency, and frailty singly or in combination have different impact on health outcomes. *Age (Dordrecht, Netherlands)*. 2014;36(2):923-31.
21. Cassell A, Edwards D, Harshfield A, Rhodes K, Brimicombe J, Payne R, et al. The epidemiology of multimorbidity in primary care: A retrospective cohort study. *British Journal of General Practice*. 2018;68(669):e245-e51.
22. Brinda EM, Attermann J, Gerdtham UG, Enemark U. Socio-economic inequalities in health and health service use among older adults in India: results from the WHO Study on Global AGEing and adult health survey. *Public health*. 2016;141:32-41.
23. Kone AP, Mondor L, Maxwell C, Kabir US, Rosella LC, Wodchis WP. Rising burden of multimorbidity and related socio-demographic factors: a repeated cross-sectional study of Ontarians. *Canadian journal of public health = Revue canadienne de sante publique*. 2021;112(4):737-47.
24. Eakin EG, Bull SS, Riley KM, Reeves MM, McLaughlin P, Gutierrez S. Resources for health: A primary-care-based diet and physical activity intervention targeting urban Latinos with multiple chronic conditions. *Health Psychology*. 2007;26(4):392-400.
25. Frakes KA, Brownie S, Davies L, Thomas J, Miller ME, Tyack Z. The sociodemographic and health-related characteristics of a regional population with chronic disease at an interprofessional student-assisted clinic in Queensland Capricornia Allied Health Partnership. *The Australian journal of rural health*. 2013;21(2):97-104.
26. Kangovi S, Mitra N, Grande D, Huo H, Smith RA, Long JA. Community Health Worker Support for Disadvantaged Patients With Multiple Chronic Diseases: A Randomized Clinical Trial. *American journal of public health*. 2017;107(10):1660-7.
27. Leiser S, Deruaz-Luyetl A, N'Goran AA, Pasquier J, Streit S, Neuner-Jehle S, et al. Determinants associated with deprivation in multimorbid patients in primary care-A cross-sectional study in Switzerland. *Plos One*. 2017;12(7).
28. Smith SM, Ferede A, O'Dowd T. Multimorbidity in younger deprived patients: an exploratory study of research and service implications in general practice. *BMC Fam Pract*. 2008;9:6.
29. von dem Knesebeck O, Bickel H, Fuchs A, Gensichen J, Hoefels S, Riedel-Heller SG, et al. Social inequalities in patient-reported outcomes among older multimorbid patients - results of the MultiCare cohort study. *International journal for equity in health*. 2015;14.
30. Jantz I. Multimorbidity at midlife: An analysis of morbidity patterns and life course socioeconomic cofactors. *Dissertation Abstracts International Section A: Humanities and Social Sciences*. 2017;78(5-A(E)):No Pagination Specified.
31. Pati S, Swain S. Prevalence, pattern and correlates of multimorbidity among primary care patients in India. *Tropical Medicine and International Health*. 2015;1(1):250.
32. Russel J, Grant C, Morton S. Cumulative socioeconomic disadvantage increases the risk of multi-morbidity in early childhood. *Journal of Paediatrics and Child Health*. 2017;53(S3):5.
33. Cezard G, Keenan K, Sullivan F. Socioeconomic disparities in the development of multimorbidity in Scotland: The Benefits of Applying a Life Course longitudinal approach. *JOURNAL OF EPIDEMIOLOGY AND COMMUNITY HEALTH*. 2020;74:A60-A.
34. Zou S, Wang Z, Bhura M, Zhang G, Tang K. Prevalence and associated socioeconomic factors of multimorbidity in ten regions of China: a cross-sectional analysis. *The Lancet*. 2020;396(Supplement 1):S12.
35. Myung K, Yo Han L, Yong-Soo K, Shin J-Y, Lim J, Nazroo J. Socioeconomic inequalities in health in the context of multimorbidity: A Korean panel study. *PLoS One*. 2017;12(3).
36. Srinivasa Vittal K, Skivington K, Leyland AH, Hunt K, Mercer SW. The contribution of risk factors to socioeconomic inequalities in multimorbidity across the lifecourse: a longitudinal analysis of the Twenty-07 cohort. *BMC medicine*. 2017;15.
37. Aminisani N, Stephens C, Allen J, Alpass F, Shamshirgaran SM. Socio-demographic and lifestyle factors associated with multimorbidity in New Zealand. *EPIDEMIOLOGY AND HEALTH*. 2019;42.
38. Chamberlain AM, Rutten LJJ, Wilson PM, Fan C, Boyd CM, Jacobson DJ, et al. Neighborhood socioeconomic disadvantage is associated with multimorbidity in a geographically-defined community (vol 20, 13, 2020). *BMC PUBLIC HEALTH*. 2020;20(1).



- 1  
2  
3 39. Pati S, Swain S, Knottnerus JA, Metsemakers JFM, Van Den Akker M. Magnitude and  
4 determinants of multimorbidity and health care utilization among patients attending public versus  
5 private primary care: A cross-sectional study from Odisha, India. *International Journal for Equity in*  
6 *Health*. 2020;19(1):57.
- 7 40. Ahmadi B, Alimohammadian M, Yaseri M, Majidi A, Boreiri M, Islami F, et al.  
8 Multimorbidity: Epidemiology and Risk Factors in the Golestan Cohort Study, Iran: A Cross-  
9 Sectional Analysis. *Medicine*. 2016;95(7):e2756.
- 10 41. Ataguba JE. Inequalities in multimorbidity in South Africa. *Intern*. 2013;12:64.
- 11 42. Kunna R, Miguel San S, Jennifer Stewart W. Measurement and decomposition of  
12 socioeconomic inequality in single and multimorbidity in older adults in China and Ghana: results  
13 from the WHO study on global AGEing and adult health (SAGE). *Intern*. 2017;16.
- 14 43. Nunes BP, Thume E, Facchini LA. Multimorbidity in older adults: magnitude and challenges  
15 for the Brazilian health system. *BMC Public Health*. 2015;15:1172.
- 16 44. Habib RR, Mikati D, Hojeij S, El Asmar K, Chaaya M, Zurayk R. Associations between poor  
17 living conditions and multi-morbidity among Syrian migrant agricultural workers in Lebanon.  
18 *European journal of public health*. 2016;26(6):1039-44.
- 19 45. Shadmi E. Disparities in multiple chronic conditions within populations. *Journal of*  
20 *comorbidity*. 2013;3(Spec Issue):45-50.
- 21 46. Melo LAd, Lima KCd. Factors associated with the most frequent multimorbidities in  
22 Brazilian older adults. *Ciencia & saude coletiva*. 2020;25(10):3879-88.
- 23 47. Korea National Health & Nutrition Survey. National Diet and Nutrition Survey [Internet].  
24 2018 [updated c2018; cited 2021 Oct 25]. Available from:  
25 <https://knhanes.cdc.go.kr/knhanes/eng/index.do>.
- 26 48. Basham CA. Regional variation in multimorbidity prevalence in British Columbia, Canada: a  
27 cross-sectional analysis of Canadian Community Health Survey data, 2015/16. *Health Promot*  
28 *Chronic Dis Prev Can*. 2020;40(7-8):225-34.
- 29 49. Douglas KA, Vinjerui KH, Krokstad S, Bjorngaard JH, Sund ER. Socioeconomic position,  
30 multimorbidity and mortality in a population cohort: The hunt study. *Journal of Clinical Medicine*.  
31 2020;9(9):1-13.
- 32 50. Guimaraes RM, Andrade FCD. Healthy life-expectancy and multimorbidity among older  
33 adults: Do inequality and poverty matter? *Arch Gerontol Geriatr*. 2020;90((Guimaraes) Fundacao  
34 Oswaldo Cruz, Avenida Brasil, 4365, Mangueiros, Rio de Janeiro, RJ 21041-360, Brazil(Guimaraes,  
35 Andrade) University of Illinois at Urban-Champaign, 1010W Nevada Street, Office 2107, Urbana, IL  
36 61801, United States):104157.
- 37 51. Harrison C, Britt H, Miller G, Henderson J. Examining different measures of multimorbidity,  
38 using a large prospective cross-sectional study in Australian general practice. *BMJ open*.  
39 2014;4(7):e004694.
- 40 52. Kivimaki M, Batty GD, Pentti J, Shipley MJ, Sipila PN, Nyberg ST, et al. Association  
41 between socioeconomic status and the development of mental and physical health conditions in  
42 adulthood: a multi-cohort study. *LANCET PUBLIC HEALTH*. 2020;5(3):E140-E9.
- 43 53. Calderon-Larranaga A, Marengoni A, Roso-Llorach A, Fernandez-Bertolin S, Guisado-  
44 Clavero M, Violan C, et al. Patterns of Multimorbidity in a Population-Based Cohort of Older People:  
45 Sociodemographic, Lifestyle, Clinical, and Functional Differences. *The journals of gerontology Series*  
46 *A, Biological sciences and medical sciences*. 2020;75(4):798-805.
- 47 54. Carrilero N, Dalmau-Bueno A, Garcia-Altes A. Comorbidity patterns and socioeconomic  
48 inequalities in children under 15 with medical complexity: a population-based study. *BMC*  
49 *PEDIATRICS*. 2020;20(1).
- 50 55. Shang X, Peng W, Wu J, He M, Zhang L. Leading determinants for multimorbidity in  
51 middle-aged Australian men and women: A nine-year follow-up cohort study. *Prev Med*.  
52 2020;141((Shang, Wu, He, Zhang) Centre for Eye Research Australia, Royal Victorian Eye and Ear  
53 Hospital, Melbourne, Australia(Shang) School of Behavioural and Health Sciences, Australian  
54 Catholic University, Australia(Shang) Department of Medicine (Royal Melbourne):106260.
- 55 56. Vinjerui KH, Boeckxstaens P, Douglas KA, Sund ER. Prevalence of multimorbidity with  
56 frailty and associations with socioeconomic position in an adult population: Findings from the cross-  
57 sectional HUNT Study in Norway. *BMJ Open*. 2020;10(6):e035070.
- 58  
59  
60

## Preferred Reporting Items for Systematic reviews and Meta-Analyses extension for Scoping Reviews (PRISMA-ScR) Checklist

| SECTION                                               | ITEM | PRISMA-ScR CHECKLIST ITEM                                                                                                                                                                                                                                                                                  | REPORTED ON PAGE # |
|-------------------------------------------------------|------|------------------------------------------------------------------------------------------------------------------------------------------------------------------------------------------------------------------------------------------------------------------------------------------------------------|--------------------|
| <b>TITLE</b>                                          |      |                                                                                                                                                                                                                                                                                                            |                    |
| Title                                                 | 1    | Identify the report as a scoping review.                                                                                                                                                                                                                                                                   |                    |
| <b>ABSTRACT</b>                                       |      |                                                                                                                                                                                                                                                                                                            |                    |
| Structured summary                                    | 2    | Provide a structured summary that includes (as applicable): background, objectives, eligibility criteria, sources of evidence, charting methods, results, and conclusions that relate to the review questions and objectives.                                                                              |                    |
| <b>INTRODUCTION</b>                                   |      |                                                                                                                                                                                                                                                                                                            |                    |
| Rationale                                             | 3    | Describe the rationale for the review in the context of what is already known. Explain why the review questions/objectives lend themselves to a scoping review approach.                                                                                                                                   |                    |
| Objectives                                            | 4    | Provide an explicit statement of the questions and objectives being addressed with reference to their key elements (e.g., population or participants, concepts, and context) or other relevant key elements used to conceptualize the review questions and/or objectives.                                  |                    |
| <b>METHODS</b>                                        |      |                                                                                                                                                                                                                                                                                                            |                    |
| Protocol and registration                             | 5    | Indicate whether a review protocol exists; state if and where it can be accessed (e.g., a Web address); and if available, provide registration information, including the registration number.                                                                                                             |                    |
| Eligibility criteria                                  | 6    | Specify characteristics of the sources of evidence used as eligibility criteria (e.g., years considered, language, and publication status), and provide a rationale.                                                                                                                                       |                    |
| Information sources*                                  | 7    | Describe all information sources in the search (e.g., databases with dates of coverage and contact with authors to identify additional sources), as well as the date the most recent search was executed.                                                                                                  |                    |
| Search                                                | 8    | Present the full electronic search strategy for at least 1 database, including any limits used, such that it could be repeated.                                                                                                                                                                            |                    |
| Selection of sources of evidence†                     | 9    | State the process for selecting sources of evidence (i.e., screening and eligibility) included in the scoping review.                                                                                                                                                                                      |                    |
| Data charting process‡                                | 10   | Describe the methods of charting data from the included sources of evidence (e.g., calibrated forms or forms that have been tested by the team before their use, and whether data charting was done independently or in duplicate) and any processes for obtaining and confirming data from investigators. |                    |
| Data items                                            | 11   | List and define all variables for which data were sought and any assumptions and simplifications made.                                                                                                                                                                                                     |                    |
| Critical appraisal of individual sources of evidence§ | 12   | If done, provide a rationale for conducting a critical appraisal of included sources of evidence; describe the methods used and how this information was used in any data synthesis (if appropriate).                                                                                                      |                    |
| Synthesis of results                                  | 13   | Describe the methods of handling and summarizing the data that were charted.                                                                                                                                                                                                                               |                    |

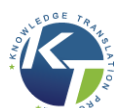

| SECTION                                       | ITEM | PRISMA-ScR CHECKLIST ITEM                                                                                                                                                                       | REPORTED ON PAGE # |
|-----------------------------------------------|------|-------------------------------------------------------------------------------------------------------------------------------------------------------------------------------------------------|--------------------|
| <b>RESULTS</b>                                |      |                                                                                                                                                                                                 |                    |
| Selection of sources of evidence              | 14   | Give numbers of sources of evidence screened, assessed for eligibility, and included in the review, with reasons for exclusions at each stage, ideally using a flow diagram.                    |                    |
| Characteristics of sources of evidence        | 15   | For each source of evidence, present characteristics for which data were charted and provide the citations.                                                                                     |                    |
| Critical appraisal within sources of evidence | 16   | If done, present data on critical appraisal of included sources of evidence (see item 12).                                                                                                      |                    |
| Results of individual sources of evidence     | 17   | For each included source of evidence, present the relevant data that were charted that relate to the review questions and objectives.                                                           |                    |
| Synthesis of results                          | 18   | Summarize and/or present the charting results as they relate to the review questions and objectives.                                                                                            |                    |
| <b>DISCUSSION</b>                             |      |                                                                                                                                                                                                 |                    |
| Summary of evidence                           | 19   | Summarize the main results (including an overview of concepts, themes, and types of evidence available), link to the review questions and objectives, and consider the relevance to key groups. |                    |
| Limitations                                   | 20   | Discuss the limitations of the scoping review process.                                                                                                                                          |                    |
| Conclusions                                   | 21   | Provide a general interpretation of the results with respect to the review questions and objectives, as well as potential implications and/or next steps.                                       |                    |
| <b>FUNDING</b>                                |      |                                                                                                                                                                                                 |                    |
| Funding                                       | 22   | Describe sources of funding for the included sources of evidence, as well as sources of funding for the scoping review. Describe the role of the funders of the scoping review.                 |                    |

JBI = Joanna Briggs Institute; PRISMA-ScR = Preferred Reporting Items for Systematic reviews and Meta-Analyses extension for Scoping Reviews.

\* Where *sources of evidence* (see second footnote) are compiled from, such as bibliographic databases, social media platforms, and Web sites.

† A more inclusive/heterogeneous term used to account for the different types of evidence or data sources (e.g., quantitative and/or qualitative research, expert opinion, and policy documents) that may be eligible in a scoping review as opposed to only studies. This is not to be confused with *information sources* (see first footnote).

‡ The frameworks by Arksey and O'Malley (6) and Levac and colleagues (7) and the JBI guidance (4, 5) refer to the process of data extraction in a scoping review as data charting.

§ The process of systematically examining research evidence to assess its validity, results, and relevance before using it to inform a decision. This term is used for items 12 and 19 instead of "risk of bias" (which is more applicable to systematic reviews of interventions) to include and acknowledge the various sources of evidence that may be used in a scoping review (e.g., quantitative and/or qualitative research, expert opinion, and policy document).

From: Tricco AC, Lillie E, Zarin W, O'Brien KK, Colquhoun H, Levac D, et al. PRISMA Extension for Scoping Reviews (PRISMA-ScR): Checklist and Explanation. *Ann Intern Med.* 2018;169:467–473. doi: [10.7326/M18-0850](https://doi.org/10.7326/M18-0850).

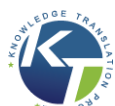

Supplement: bmjopen-2021-055264.draft_revisions.pdf [file bmjopen-2021-055264.draft_revisions.pdf]
