# Supplementary material for: Theoretical explanations for socioeconomic inequalities in multimorbidity: a scoping review
Source: HighWire-hosted journal article supplement (doi:10.1136/bmjopen-2021-055264), 2022-02-01
Supplement: bmjopen-2021-055264supp001_data_supplement.pdf [file bmjopen-2021-055264supp001_data_supplement.pdf]

## Appendices

### Contents

|                                                                             |    |
|-----------------------------------------------------------------------------|----|
| Appendix 1. Detailed search strategy according to electronic databases..... | 2  |
| MEDLINE.....                                                                | 2  |
| WEB OF SCIENCE.....                                                         | 6  |
| PUBMED.....                                                                 | 8  |
| Appendix 2. Reasons for exclusion of studies after full-text review .....   | 11 |
| References.....                                                             | 12 |

## Appendix 1. Detailed search strategy according to electronic databases

### MEDLINE

| Outcome                                                                                                     | Exposure                                                                                                                                                                                                                                                                                                                                                                                                                                                                                                                                                      | Phenomenon                                                                                                                                                                                                                                                                                                                                                                                                                             |
|-------------------------------------------------------------------------------------------------------------|---------------------------------------------------------------------------------------------------------------------------------------------------------------------------------------------------------------------------------------------------------------------------------------------------------------------------------------------------------------------------------------------------------------------------------------------------------------------------------------------------------------------------------------------------------------|----------------------------------------------------------------------------------------------------------------------------------------------------------------------------------------------------------------------------------------------------------------------------------------------------------------------------------------------------------------------------------------------------------------------------------------|
| ( multimorb\$ or multi?morb\$<br>or<br>multiple chronic conditions\$ or<br>multiple chronic diseases\$).ti. | Psychosocial Deprivation* .ti. OR<br>OR<br>exp Family characteristics/ OR<br>exp Hierarchy, Social/ OR<br>Social Hierarch* .ti. OR<br>Minority Group* .ti. OR<br>exp Social Class/ OR<br>Social class* .ti. OR<br>Social Mobilit* .ti. OR<br>Caste* .ti. OR<br>Social Condition* .ti. OR<br>exp Sociology/ OR<br>Poverty .ti. OR<br>exp Socioeconomic Factors/ OR<br>Socioeconomic* .ti. OR<br>Salary .ti. OR<br>Salaries .ti. OR<br>Income* .ti. OR<br>Wage* .ti. OR<br>Remuneration* .ti. OR<br>Occupation* .ti. OR<br>Unemploy* .ti. OR<br>Labour* .ti. OR | Inequalit*.ab. OR<br>Unequal*.ab. OR<br>Disparit* .ab. OR<br>Inequit* .ab. OR<br>Difference* .ab. OR<br>Different*.ab. OR<br>Discriminat* .ab. OR<br>Marginali*.ab OR<br>Marginali*.ti OR<br>Depriv* .ab. OR<br>Inequalit*.ti. OR<br>Disparit* .ti. OR<br>Inequit* .ti. OR<br>Difference* .ti. OR<br>Discriminat* .ti. OR<br>Depriv* .ti. OR<br>Disadvantage*.ti. OR<br>Disadvantage*.ab.<br>OR<br>Vulnerab*.ab<br>OR<br>Vulnerab*.ti. |

|  |                                                                                                                                                                                                                                                                                                                                                                                                                                                                                                                                                                                                                                                                                                                                    |  |
|--|------------------------------------------------------------------------------------------------------------------------------------------------------------------------------------------------------------------------------------------------------------------------------------------------------------------------------------------------------------------------------------------------------------------------------------------------------------------------------------------------------------------------------------------------------------------------------------------------------------------------------------------------------------------------------------------------------------------------------------|--|
|  | <p>Labor* .ti. OR</p> <p>Employment* .ti OR</p> <p>Employment* .ab OR</p> <p>Educational Status.ti. OR</p> <p>Educational Achievement*.ti.<br/>OR</p> <p>Educational level*.ti OR</p> <p>Educational level*.ab OR</p> <p>Educational attainment .ti OR</p> <p>Educational attainment .ab OR</p> <p>exp Ethnic Groups/ OR</p> <p>Ethnic* .ti. OR</p> <p>Race* .ti. OR</p> <p>Raci* .ti. OR</p> <p>exp Sexism/ OR</p> <p>Sexis* .ti. OR</p> <p>exp Gender Identity/ OR</p> <p>Gender* .ti. OR</p> <p>Social Capital* .ti. OR</p> <p>Neomaterial* .ti.<br/>OR</p> <p>Social Cohesi* .ti. OR</p> <p>Materalis* .ti. OR</p> <p>Psychosocial Deprivation* .ab.<br/>OR</p> <p>Social Hierarch* .ab. OR</p> <p>Minority Group* .ab. OR</p> |  |
|--|------------------------------------------------------------------------------------------------------------------------------------------------------------------------------------------------------------------------------------------------------------------------------------------------------------------------------------------------------------------------------------------------------------------------------------------------------------------------------------------------------------------------------------------------------------------------------------------------------------------------------------------------------------------------------------------------------------------------------------|--|

|  |                                                                                                                                                                                                                                                                                                                                                                                                                                                                                                                                                                                                                                                                                         |  |
|--|-----------------------------------------------------------------------------------------------------------------------------------------------------------------------------------------------------------------------------------------------------------------------------------------------------------------------------------------------------------------------------------------------------------------------------------------------------------------------------------------------------------------------------------------------------------------------------------------------------------------------------------------------------------------------------------------|--|
|  | <p>Social class* .ab. OR</p> <p>Social Mobilit* .ab. OR</p> <p>Caste* .ab. OR</p> <p>Social Condition* .ab. OR</p> <p>Poverty .ab. OR</p> <p>Socioeconomic* .ab. OR</p> <p>Salary .ab. OR</p> <p>Salaries .ab. OR</p> <p>Income* .ab. OR</p> <p>Wage* .ab. OR</p> <p>Remuneration* .ab. OR</p> <p>Occupation* .ab. OR</p> <p>Unemploy* .ab. OR</p> <p>Labour* .ab. OR</p> <p>Labor* .ab. OR</p> <p>Educational Status.ab. OR</p> <p>Educational Achievement* .ab.<br/>OR</p> <p>Ethnic* .ab. OR</p> <p>Race* .ab. OR</p> <p>Raci* .ab. OR</p> <p>Sexis* .ab. OR</p> <p>Gender* .ab. OR</p> <p>Social Capital* .ab. OR</p> <p>Neomaterial* .ab.<br/>OR</p> <p>Social Cohesi* .ab. OR</p> |  |
|--|-----------------------------------------------------------------------------------------------------------------------------------------------------------------------------------------------------------------------------------------------------------------------------------------------------------------------------------------------------------------------------------------------------------------------------------------------------------------------------------------------------------------------------------------------------------------------------------------------------------------------------------------------------------------------------------------|--|

|  |                                          |  |
|--|------------------------------------------|--|
|  | Materialis* .ab. OR<br>Neomaterial* .ab. |  |
|--|------------------------------------------|--|

## WEB OF SCIENCE

| Outcome                                                                                           | Exposure                                                                                                                                                                                                                                                                                                                                                                                                                    | Phenomenon                                                                                                                                                   |
|---------------------------------------------------------------------------------------------------|-----------------------------------------------------------------------------------------------------------------------------------------------------------------------------------------------------------------------------------------------------------------------------------------------------------------------------------------------------------------------------------------------------------------------------|--------------------------------------------------------------------------------------------------------------------------------------------------------------|
| TS = (multimorb* OR multi-morb* OR “multiple chronic condition*” OR “multiple chronic disease**”) | TS = (“Psychosocial Deprivation*” OR “Family characteristics” OR “Social Hierarch*” OR “Minority Group*” OR “Social Class” OR “Social Mobilit*” OR Caste* OR “Social Condition*” OR Sociology OR Poverty. OR “Socioeconomic Factors” OR Socioeconomic* OR Salary OR Salaries OR Income* OR Wage* OR Remuneration* OR Occupation* OR Unemploy* OR Labour* OR Labor* OR Employment* OR Employment* OR “Educational Status” OR | TS = ( Inequalit* OR Unequal* OR Disparit* OR Inequit* OR Difference* OR Different* OR Discriminat* OR Marginali* OR Depriv* OR Disadvantage* OR Vulnerab* ) |

|  |                                                                                                                                                                                                                                                                                                                                             |  |
|--|---------------------------------------------------------------------------------------------------------------------------------------------------------------------------------------------------------------------------------------------------------------------------------------------------------------------------------------------|--|
|  | “Educational Achievement*” OR<br>“Educational level*” OR<br>“Educational attainment” OR<br>“Ethnic Groups” OR<br>Ethnic* OR<br>Race* OR<br>Raci* OR<br>Sexism OR<br>Saxis* OR<br>“Gender Identity” OR<br>Gender* OR<br>“Social Capital*” OR<br>“Social Cohesi*” OR<br>Materalis* OR<br>Neomaterial*<br>OR<br>Materalis* OR<br>Neomaterial*) |  |
|--|---------------------------------------------------------------------------------------------------------------------------------------------------------------------------------------------------------------------------------------------------------------------------------------------------------------------------------------------|--|

## PUBMED

| Outcome                                                                                                                                                                                      | Exposure                                                                                                                                                                                                                                                                                                                                                                                                                                                                                                                                                                                                    | Phenomenon                                                                                                                                                                                                                                          |
|----------------------------------------------------------------------------------------------------------------------------------------------------------------------------------------------|-------------------------------------------------------------------------------------------------------------------------------------------------------------------------------------------------------------------------------------------------------------------------------------------------------------------------------------------------------------------------------------------------------------------------------------------------------------------------------------------------------------------------------------------------------------------------------------------------------------|-----------------------------------------------------------------------------------------------------------------------------------------------------------------------------------------------------------------------------------------------------|
| multimorb*[TIAB] OR<br>multimorbidity[MH] OR<br>multi-morb*[TIAB] OR<br>multiple chronic<br>condition*[TIAB] OR<br>multiple chronic<br>disease*[TIAB] OR<br>multiple chronic disease<br>[MH] | Psychosocial<br>Deprivation*[TIAB] OR<br>Family characteristics [TIAB]<br>OR<br>Social Hierarch*[TIAB] OR<br>Minority Group*[TIAB] OR<br>Social Class[TIAB] OR<br>Social Mobilit*[TIAB] OR<br>Caste*[TIAB] OR<br>Social Condition*[TIAB] OR<br>Sociology[TIAB] OR<br>Poverty [TIAB] OR<br>Socioeconomic Factors[TIAB]<br>OR<br>Socioeconomic*[TIAB] OR<br>Salary[TIAB] OR<br>Salaries[TIAB] OR<br>Income*[TIAB] OR<br>Wage*[TIAB] OR<br>Remuneration*[TIAB] OR<br>Occupation*[TIAB] OR<br>Unemploy*[TIAB] OR<br>Labour*[TIAB] OR<br>Labor*[TIAB] OR<br>Employment*[TIAB] OR<br>Educational Status [TIAB] OR | Inequalit*[TIAB] OR<br>Unequal*[TIAB] OR<br>Disparit*[TIAB] OR<br>Inequit*[TIAB] OR<br>Difference*[TIAB] OR<br>Different*[TIAB] OR<br>Discriminat*[TIAB] OR<br>Marginali*[TIAB] OR<br>Depriv*[TIAB] OR<br>Disadvantage*[TIAB] OR<br>Vulnerab*[TIAB] |



|  |                                                                                                                                                                                                                                                                                                                                                                                                                                       |  |
|--|---------------------------------------------------------------------------------------------------------------------------------------------------------------------------------------------------------------------------------------------------------------------------------------------------------------------------------------------------------------------------------------------------------------------------------------|--|
|  | Educational Achievement*[TIAB] OR<br>Educational level*[TIAB] OR<br>Educational attainment [TIAB] OR<br>Ethnic Groups[TIAB] OR<br>Ethnic*[TIAB] OR<br>Race*[TIAB] OR<br>Raci*[TIAB] OR<br>Sexism[TIAB] OR<br>Saxis*[TIAB] OR<br>“Gender Identity”[TIAB] OR<br>Gender*[TIAB] OR<br>Social Capital*[TIAB] OR<br>Social Cohesi*[TIAB] OR<br>Materalis*[TIAB] OR<br>Neomaterial*[TIAB]<br>OR<br>Materalis*[TIAB] OR<br>Neomaterial*[TIAB] |  |
|--|---------------------------------------------------------------------------------------------------------------------------------------------------------------------------------------------------------------------------------------------------------------------------------------------------------------------------------------------------------------------------------------------------------------------------------------|--|

**PROQUEST** (Applied Social Sciences/ERIC/Humanities Index/ProQuest Central/ProQuest dissertation and Thesis Global/Sociological Abstracts)

multimorb\* OR multi-morb\* OR “multiple chronic condition\*” OR “multiple chronic diseases\*”

AND

“Psychosocial Deprivation\*” OR “Family characteristics” OR “Social Hierarch\*” OR “Minority Group\*” OR “Social Class” OR “Social Mobilit\*” OR Caste\* OR “Social Condition\*” OR Sociology OR Poverty. OR “Socioeconomic Factors” OR Socioeconomic\* OR Salary OR Salaries OR Income\* OR Wage\* OR Remuneration\* OR Occupation\* OR

Unemploy\* OR Labour\* OR Labor\* OR Employment\* OR Employment\* OR “Educational Status” OR “Educational Achievement\*” OR “Educational level\*” OR “Educational attainment” OR “Ethnic Groups” OR Ethnic\* OR Race\* OR Raci\* OR Sexism OR Saxis\* OR “Gender Identity” OR Gender\* OR “Social Capital\*” OR “Social Cohesi\*” OR Materalis\* OR Neomaterial\* OR Materalis\* OR Neomaterial\*

AND

Inequalit\* OR Unequal\* OR Disparit\* OR Inequit\* OR Difference\* OR Different\* OR Discriminat\* OR Marginali\* OR Depriv\* OR Disadvantage\* ORVulnerab\*

## Appendix 2. Reasons for exclusion of studies after full-text review

**Comorbidity** Barnett, Mercer (1), Gallacher, McQueenie (2), Alonso-Moran, Orueta (3)

**Unclear definition of multimorbidity** Chau, Baumann (4), Reis-Santos, Gomes (5)

**Did not explore the association between socioeconomic disadvantage and multimorbidity** Charlton, Rudisill (6), Galenkamp, Gagliardi (7), Golinowska, Sowa (8), Jessen, Pallesen (9), Koroukian, Schiltz (10), Mujica-Mota, Roberts (11), Orueta, Garcia-Alvarez (12), Phaswana-Mafuya, Peltzer (13), Rodrigues, Gregorio (14), Thavorn, Maxwell (15), Tran, Kiran (16), van den Akker, Buntinx (17), Wang, Wang (18), Ward (19), Woo and Leung (20), Cassell, Edwards (21), Brinda, Attermann (22), Kone, Mondor (23)

**Absence of comparative group** Eakin, Bull (24), Frakes, Brownie (25), Kangovi, Mitra (26), Leiser, Deruaz-Luyetl (27), Smith, Ferede (28), von dem Knesebeck, Bickel (29)

**Full-text unavailable** Jantz (30), Pati and Swain (31), Russel, Grant (32), Cezard, Keenan (33), Zou, Wang (34)

**Duplicate** Myung, Yo Han (35), Srinivasa Vittal, Skivington (36), Aminisani, Stephens (37), Chamberlain, Rutten (38), Pati, Swain (39)

**Use of the same sample** Ahmadi, Alimohammadian (40), Ataguba (41), Kunna, Miguel San (42), Nunes, Thume (43), Habib, Mikati (44)

**No primary data** Shadmi (45)

**Not in English** Melo and Lima (46)

**Not peer-reviewed** Korea National Health & Nutrition Survey (47)

**Wrong exposure** Basham (48), Douglas, Vinjerui (49), Guimaraes and Andrade (50), Harrison, Britt (51)

**Wrong outcome** Kivimaki, Batty (52)

**Wrong population** Calderon-Larranaga, Marengoni (53), Carrilero, Dalmau-Bueno (54), Shang, Peng (55), Vinjerui, Boeckxstaens (56)

## References

1. Barnett K, Mercer SW, Norbury M, Watt G, Wyke S, Guthrie B. Epidemiology of multimorbidity and implications for health care, research, and medical education: a cross-sectional study. *Lancet (London, England)*. 2012;380(9836):37-43.
2. Gallacher KI, McQueenie R, Nicholl B, Jani BD, Lee D, Mair FS. Risk factors and mortality associated with multimorbidity in people with stroke or transient ischaemic attack: a study of 8,751 UK Biobank participants. *Journal of comorbidity*. 2018;8(1):1-8.
3. Alonso-Moran E, Orueta JF, Fraile Esteban JI, Arteagoitia Axpe JM, Luz Marques Gonzalez M, Toro Polanco N, et al. Multimorbidity in people with type 2 diabetes in the Basque Country (Spain): Prevalence, comorbidity clusters and comparison with other chronic patients. *European Journal of Internal Medicine*. 2015;26(3):197-202.
4. Chau K, Baumann M, Chau N. Socioeconomic inequities patterns of multi-morbidity in early adolescence. *International journal for equity in health*. 2013;12:65.
5. Reis-Santos B, Gomes T, Macedo LR, Horta BL, Riley LW, Maciel EL. Prevalence and patterns of multimorbidity among tuberculosis patients in Brazil: a cross-sectional study. *International journal for equity in health*. 2013;12:61.
6. Charlton J, Rudisill C, Bhattarai N, Gulliford M. Impact of deprivation on occurrence, outcomes and health care costs of people with multiple morbidity. *Journal of Health Services Research & Policy*. 2013;18(4):215-23.
7. Galenkamp H, Gagliardi C, Principi A, Golinowska S, Moreira A, Schmidt AE, et al. Predictors of social leisure activities in older Europeans with and without multimorbidity. *European Journal of Ageing*. 2016;13(2):129-43.
8. Golinowska S, Sowa A, Deeg D, Socci M, Principi A, Rodrigues R, et al. Participation in formal learning activities of older Europeans in poor and good health. *Eur J Ageing*. 2016;13:115-27.
9. Jessen MAB, Palleen AVJ, Kriegbaum M, Kristiansen M. The association between loneliness and health - a survey-based study among middle-aged and older adults in Denmark. *Ageing & mental health*. 2017:1-6.
10. Koroukian SM, Schiltz NK, Warner DF, Given CW, Schluchter M, Owusu C, et al. Social determinants, multimorbidity, and patterns of end-of-life care in older adults dying from cancer. *Journal of Geriatric Oncology*. 2017;8(2):117-24.
11. Mujica-Mota RE, Roberts M, Abel G, Elliott M, Lyratzopoulos G, Roland M, et al. Common patterns of morbidity and multi-morbidity and their impact on health-related quality of life: evidence from a national survey. *Quality of life research : an international journal of quality of life aspects of treatment, care and rehabilitation*. 2015;24(4):909-18.
12. Orueta JF, Garcia-Alvarez A, Garcia-Goni M, Paolucci F, Nuno-Solinis R. Prevalence and costs of multimorbidity by deprivation levels in the basque country: a population based study using health administrative databases. *PLoS One*. 2014;9(2):e89787.
13. Phaswana-Mafuya N, Peltzer K, Chirinda W, Musekiwa A, Kose Z, Hoosain E, et al. Self-reported prevalence of chronic non-communicable diseases and associated factors among older adults in South Africa. *Glob Health Action*. 2013;6:20936.
14. Rodrigues AM, Gregorio MJ, Sousa RD, Dias SS, Santos MJ, Mendes JM, et al. Challenges of Ageing in Portugal: Data from the EpiDoC Cohort. *Acta medica portuguesa*. 2018;31(2):80-93.
15. Thavorn K, Maxwell CJ, Gruneir A, Bronskill SE, Bai Y, Kone Pefoyo AJ, et al. Effect of socio-demographic factors on the association between multimorbidity and healthcare costs: a population-based, retrospective cohort study. *BMJ open*. 2017;7(10):e017264.
16. Tran J, Kiran A, Rahimi K. Prevalence of multimorbidity of cardio-metabolic disease in the United Kingdom. *European Heart Journal*. 2016;37 (Supplement 1):742.
17. van den Akker M, Buntinx F, Metsemakers JF, Knottnerus J. Marginal impact of psychosocial factors on multimorbidity: Results of an explorative nested case-control study. *Social Science & Medicine*. 2000;50(11):1679-93.
18. Wang HH, Wang JJ, Lawson KD, Wong SY, Wong MC, Li FJ, et al. Relationships of multimorbidity and income with hospital admissions in 3 health care systems. *Annals of family medicine*. 2015;13(2):164-7.

19. Ward BW. Multiple chronic conditions and labor force outcomes: A population study of U.S. adults. *American journal of industrial medicine*. 2015;58(9):943-54.
20. Woo J, Leung J. Multi-morbidity, dependency, and frailty singly or in combination have different impact on health outcomes. *Age (Dordrecht, Netherlands)*. 2014;36(2):923-31.
21. Cassell A, Edwards D, Harshfield A, Rhodes K, Brimicombe J, Payne R, et al. The epidemiology of multimorbidity in primary care: A retrospective cohort study. *British Journal of General Practice*. 2018;68(669):e245-e51.
22. Brinda EM, Attermann J, Gerdtham UG, Enemark U. Socio-economic inequalities in health and health service use among older adults in India: results from the WHO Study on Global AGEing and adult health survey. *Public health*. 2016;141:32-41.
23. Kone AP, Mondor L, Maxwell C, Kabir US, Rosella LC, Wodchis WP. Rising burden of multimorbidity and related socio-demographic factors: a repeated cross-sectional study of Ontarians. *Canadian journal of public health = Revue canadienne de sante publique*. 2021;112(4):737-47.
24. Eakin EG, Bull SS, Riley KM, Reeves MM, McLaughlin P, Gutierrez S. Resources for health: A primary-care-based diet and physical activity intervention targeting urban Latinos with multiple chronic conditions. *Health Psychology*. 2007;26(4):392-400.
25. Frakes KA, Brownie S, Davies L, Thomas J, Miller ME, Tyack Z. The sociodemographic and health-related characteristics of a regional population with chronic disease at an interprofessional student-assisted clinic in Queensland Capricornia Allied Health Partnership. *The Australian journal of rural health*. 2013;21(2):97-104.
26. Kangovi S, Mitra N, Grande D, Huo H, Smith RA, Long JA. Community Health Worker Support for Disadvantaged Patients With Multiple Chronic Diseases: A Randomized Clinical Trial. *American journal of public health*. 2017;107(10):1660-7.
27. Leiser S, Deruaz-Luyetl A, N'Goran AA, Pasquier J, Streit S, Neuner-Jehle S, et al. Determinants associated with deprivation in multimorbid patients in primary care-A cross-sectional study in Switzerland. *Plos One*. 2017;12(7).
28. Smith SM, Ferede A, O'Dowd T. Multimorbidity in younger deprived patients: an exploratory study of research and service implications in general practice. *BMC Fam Pract*. 2008;9:6.
29. von dem Knesebeck O, Bickel H, Fuchs A, Gensichen J, Hoefels S, Riedel-Heller SG, et al. Social inequalities in patient-reported outcomes among older multimorbid patients - results of the MultiCare cohort study. *International journal for equity in health*. 2015;14.
30. Jantz I. Multimorbidity at midlife: An analysis of morbidity patterns and life course socioeconomic cofactors. *Dissertation Abstracts International Section A: Humanities and Social Sciences*. 2017;78(5-A(E)):No Pagination Specified.
31. Pati S, Swain S. Prevalence, pattern and correlates of multimorbidity among primary care patients in India. *Tropical Medicine and International Health*. 2015;1(1):250.
32. Russel J, Grant C, Morton S. Cumulative socioeconomic disadvantage increases the risk of multi-morbidity in early childhood. *Journal of Paediatrics and Child Health*. 2017;53(S3):5.
33. Cezard G, Keenan K, Sullivan F. Socioeconomic disparities in the development of multimorbidity in Scotland: The Benefits of Applying a Life Course longitudinal approach. *JOURNAL OF EPIDEMIOLOGY AND COMMUNITY HEALTH*. 2020;74:A60-A.
34. Zou S, Wang Z, Bhura M, Zhang G, Tang K. Prevalence and associated socioeconomic factors of multimorbidity in ten regions of China: a cross-sectional analysis. *The Lancet*. 2020;396(Supplement 1):S12.
35. Myung K, Yo Han L, Yong-Soo K, Shin J-Y, Lim J, Nazroo J. Socioeconomic inequalities in health in the context of multimorbidity: A Korean panel study. *PLoS One*. 2017;12(3).
36. Srinivasa Vittal K, Skivington K, Leyland AH, Hunt K, Mercer SW. The contribution of risk factors to socioeconomic inequalities in multimorbidity across the lifecourse: a longitudinal analysis of the Twenty-07 cohort. *BMC medicine*. 2017;15.
37. Aminisani N, Stephens C, Allen J, Alpess F, Shamshirgaran SM. Socio-demographic and lifestyle factors associated with multimorbidity in New Zealand. *EPIDEMIOLOGY AND HEALTH*. 2019;42.
38. Chamberlain AM, Rutten LJJ, Wilson PM, Fan C, Boyd CM, Jacobson DJ, et al. Neighborhood socioeconomic disadvantage is associated with multimorbidity in a geographically-defined community (vol 20, 13, 2020). *BMC PUBLIC HEALTH*. 2020;20(1).

39. Pati S, Swain S, Knottnerus JA, Metsemakers JFM, Van Den Akker M. Magnitude and determinants of multimorbidity and health care utilization among patients attending public versus private primary care: A cross-sectional study from Odisha, India. *International Journal for Equity in Health*. 2020;19(1):57.
40. Ahmadi B, Alimohammadian M, Yaseri M, Majidi A, Boreiri M, Islami F, et al. Multimorbidity: Epidemiology and Risk Factors in the Golestan Cohort Study, Iran: A Cross-Sectional Analysis. *Medicine*. 2016;95(7):e2756.
41. Ataguba JE. Inequalities in multimorbidity in South Africa. *Intern*. 2013;12:64.
42. Kunna R, Miguel San S, Jennifer Stewart W. Measurement and decomposition of socioeconomic inequality in single and multimorbidity in older adults in China and Ghana: results from the WHO study on global AGEing and adult health (SAGE). *Intern*. 2017;16.
43. Nunes BP, Thume E, Facchini LA. Multimorbidity in older adults: magnitude and challenges for the Brazilian health system. *BMC Public Health*. 2015;15:1172.
44. Habib RR, Mikati D, Hojeij S, El Asmar K, Chaaya M, Zurayk R. Associations between poor living conditions and multi-morbidity among Syrian migrant agricultural workers in Lebanon. *European journal of public health*. 2016;26(6):1039-44.
45. Shadmi E. Disparities in multiple chronic conditions within populations. *Journal of comorbidity*. 2013;3(Spec Issue):45-50.
46. Melo LAd, Lima KCd. Factors associated with the most frequent multimorbidities in Brazilian older adults. *Ciencia & saude coletiva*. 2020;25(10):3879-88.
47. Korea National Health & Nutrition Survey. National Diet and Nutrition Survey [Internet]. 2018 [updated c2018; cited 2021 Oct 25]. Available from: <https://knhanes.cdc.go.kr/knhanes/eng/index.do>.
48. Basham CA. Regional variation in multimorbidity prevalence in British Columbia, Canada: a cross-sectional analysis of Canadian Community Health Survey data, 2015/16. *Health Promot Chronic Dis Prev Can*. 2020;40(7-8):225-34.
49. Douglas KA, Vinjerui KH, Krokstad S, Bjorngaard JH, Sund ER. Socioeconomic position, multimorbidity and mortality in a population cohort: The hunt study. *Journal of Clinical Medicine*. 2020;9(9):1-13.
50. Guimaraes RM, Andrade FCD. Healthy life-expectancy and multimorbidity among older adults: Do inequality and poverty matter? *Arch Gerontol Geriatr*. 2020;90((Guimaraes) Fundacao Oswaldo Cruz, Avenida Brasil, 4365, Manguinhos, Rio de Janeiro, RJ 21041-360, Brazil(Guimaraes, Andrade) University of Illinois at Urban-Champaign, 1010W Nevada Street, Office 2107, Urbana, IL 61801, United States):104157.
51. Harrison C, Britt H, Miller G, Henderson J. Examining different measures of multimorbidity, using a large prospective cross-sectional study in Australian general practice. *BMJ open*. 2014;4(7):e004694.
52. Kivimaki M, Batty GD, Pentti J, Shipley MJ, Sipila PN, Nyberg ST, et al. Association between socioeconomic status and the development of mental and physical health conditions in adulthood: a multi-cohort study. *LANCET PUBLIC HEALTH*. 2020;5(3):E140-E9.
53. Calderon-Larranaga A, Marengoni A, Roso-Llorach A, Fernandez-Bertolin S, Guisado-Clavero M, Violan C, et al. Patterns of Multimorbidity in a Population-Based Cohort of Older People: Sociodemographic, Lifestyle, Clinical, and Functional Differences. *The journals of gerontology Series A, Biological sciences and medical sciences*. 2020;75(4):798-805.
54. Carrilero N, Dalmau-Bueno A, Garcia-Altes A. Comorbidity patterns and socioeconomic inequalities in children under 15 with medical complexity: a population-based study. *BMC PEDIATRICS*. 2020;20(1).
55. Shang X, Peng W, Wu J, He M, Zhang L. Leading determinants for multimorbidity in middle-aged Australian men and women: A nine-year follow-up cohort study. *Prev Med*. 2020;141((Shang, Wu, He, Zhang) Centre for Eye Research Australia, Royal Victorian Eye and Ear Hospital, Melbourne, Australia(Shang) School of Behavioural and Health Sciences, Australian Catholic University, Australia(Shang) Department of Medicine (Royal Melbourne):106260.
56. Vinjerui KH, Boeckxstaens P, Douglas KA, Sund ER. Prevalence of multimorbidity with frailty and associations with socioeconomic position in an adult population: Findings from the cross-sectional HUNT Study in Norway. *BMJ Open*. 2020;10(6):e035070.
